# Supplementary material for: Stimulus responsive self-assembly of Gemini Amphiphilic Pseudopeptides
Source: Royal Society of Chemistry journal article supplement (doi:10.1039/c1sm06435e), 2011-01-01
Supplement: c1sm06435e.pdf [file c1sm06435e.pdf]

## Supporting Information for:

# Stimulus Responsive Self-assembly of Gemini Amphiphilic Pseudopeptides

Jenifer Rubio,<sup>a</sup> Ignacio Alfonso<sup>b,\*</sup> M. Isabel Burguete<sup>a</sup> and Santiago V. Luis<sup>a,\*</sup>

<sup>a</sup>*Departamento de Química Inorgánica y Orgánica, Universidad Jaume I, Avd. Sos Baynat s/n, Castellón, Spain. Fax: +34 964728214; Tel: +34 964728239; E-mail: luiss@qio.uji.es*

<sup>b</sup>*Instituto de Química Avanzada de Cataluña, IQAC-CSIC, Jordi Girona 18-26, Barcelona, Spain. E-mail: ignacio.alfonso@iqac.csic.es*

### Table of contents:

|                                                                                               |      |
|-----------------------------------------------------------------------------------------------|------|
| General experimental and synthetic procedures                                                 | S-2  |
| Copies of the NMR and ESI-MS spectra                                                          | S-8  |
| SEM micrographs of compounds from chloroform solutions                                        | S-34 |
| SEM micrographs of compounds from MeOH solutions                                              | S-35 |
| SEM micrographs of compounds from 2 : 1 MeOH : H <sub>2</sub> O solutions                     | S-36 |
| SEM micrographs of compounds from 2 : 1 MeOH : H <sub>2</sub> O solutions in the presence HCl | S-37 |
| NMR spectra of A4Val <sub>a</sub> 10obenz (3) at different conditions                         | S-38 |
| NMR studies to check similar trends of compounds                                              | S-41 |
| UV spectra of A4Val <sub>a</sub> 10obenz (3) in MeOH at different concentrations              | S-46 |
| UV study of compounds at different concentrations in MeOH at acid pH.                         | S-47 |
| UV study of compounds with different long aliphatic tail                                      | S-48 |
| UV study of compounds with different amino acid side chain                                    | S-49 |
| UV extinction coefficients at the corresponding maxima for several compounds                  | S-50 |
| Selected bands of the ATR FT-IR spectra of A4Val <sub>a</sub> 10obenz at different conditions | S-51 |
| Frontier orbitals (B3LYP/6-31G*) for a simplified fragment of the GAPs                        | S-57 |

## General

Reagents and solvents were purchased from commercial suppliers (Aldrich, Fluka or Merck) and were used without further purification. The  $C_2$  symmetrical bis(amidoamines) were prepared as previously described (see reference 71 of the manuscript)

## Electron microscopy

Scanning Electron Microscopy was performed either in a LEO 440I or in a JEOL 7001F microscope with a digital camera. Samples were obtained by slow evaporation of a solution of the compounds (~1-2 mg/ml) directly onto the sample holder, and were conventionally coated previous to the measurement. Transmission Electron Microscopy was carried out in a JEOL 2100 microscope at 120 KV. The micrographs were obtained from ~1 mg/ml solutions onto a holey carbon copper grid. The samples were sonicated for 10 minutes previous to the measurement, one drop added onto the grid and collected directly without staining.

## NMR spectroscopy

The NMR experiments were carried out on a Varian INOVA 500 spectrometer (500 MHz for  $^1\text{H}$  and 125 MHz for  $^{13}\text{C}$ ) or on a Varian UNITY 300 (300 MHz for  $^1\text{H}$  and 75 MHz for  $^{13}\text{C}$ ). Chemical shifts are reported in ppm using TMS as a reference.

## Infrared spectroscopy

FT-IR spectra were acquired in a JASCO 6200 equipment having a MIRacle Single Reflection ATR Diamond / ZnSe accessory. A 20 mM sample of the corresponding pseudopeptide was prepared and seeded onto the ATR sample holder. The FT-IR spectra were sequentially collected until the complete solvent evaporation. The raw IR data were processed with the JASCO spectral manager software and the deconvolution of the bands was performed with the Origin software, using Gaussian-shaped ideal peaks.

## UV and CD spectroscopy

Spectra were recorded with a JASCO J-810 spectropolarimeter at RT. The normalized CD spectra were obtained by transforming the molar circular dichroic absorption data ( $\Delta\epsilon$ ,  $\text{cm}^2 \text{mmol}^{-1}$ ) using the formula:  $\Delta\epsilon = \theta / (32980Cl)$ , in which  $\theta$  is the measured ellipticity (in mdeg),  $C$  is the concentration (in M) and  $l$  is the pathlength (in cm). Molar extinction coefficients of the UV spectra were obtained by linear regression between the measured absorbance and the sample concentration.

## Steady-state fluorescence spectroscopy

Steady-state fluorescence spectra were recorded in a Spex Fluorog 3-11 equipped with a 450 W xenon lamp. Fluorescence spectra were recorded in the front face mode. All the samples were measured in aerated conditions otherwise stated.

## Molecular Modeling

All the theoretical calculations were performed with Spartan 06 software, using the MMFF level of theory for the geometry optimizations.

## General procedure for the reductive amination reaction

**Synthesis of A2Val\_a10obenz.** The corresponding pseudopeptidic bis(amidoamine) precursor (216.0 mg, 0.836 mmol) was dissolved in 5 mL of  $\text{CHCl}_3$  and the solution was placed inside a flask under nitrogen atmosphere. Then, 4-decyloxybenzaldehyde (476.1  $\mu\text{L}$ , 452.3 mg, 1.672 mmol) was dissolved in 5 mL of  $\text{CHCl}_3$ , this solution was added over the solution of the diamine and afterwards, 7 mL of  $\text{CHCl}_3$  were added until a final volume of 17 mL (0.05 M final concentration each). The mixture was stirred overnight, then a large excess of  $\text{Py}\cdot\text{BH}_3$  (889.0  $\mu\text{L}$ , 817.9 mg, 8.36 mmol) was carefully added at 35 °C, and the mixture was allowed to react for 24 h before being hydrolyzed (conc. HCl, to acidity) and evaporated to dryness. The residue obtained was dissolved in water, basified with 1N NaOH, and extracted with  $\text{CHCl}_3$ . The combined organic layers were dried ( $\text{MgSO}_4$ ) and evaporated in vacuum. The product was purified by flash chromatography on silica gel using  $\text{CH}_2\text{Cl}_2$  as eluent, increasing slowly the polarity with MeOH and several drops of aqueous ammonia.

Yield = 63%; mp 95-104 °C;  $[\alpha]_D^{25} = -27.0$  (c = 0.01, CHCl<sub>3</sub>); IR (ATR) 3303, 2921, 2851, 1641, 1555, 1513 cm<sup>-1</sup>; <sup>1</sup>H-NMR (500 MHz, CDCl<sub>3</sub>) δ 0.79 (m, 18H), 0.86 (m, 24H), 1.23 (m, 4H), 1.38 (s, 2H), 1.48 (m, 4H), 1.7 (m, 2H), 2.01 (m, 2H), 2.87 (m, 4H), 3.35 (dd, 2H, J = 5.2, 8.1 Hz), 3.45 (dd, 2H, J = 5.4, 8.2 Hz), 3.61 (t, 4H, J = 6.6 Hz), 6.77 (d, 4H, J = 6.77 Hz), 7.10 (d, 4H, J = 7.10 Hz), 7.53 (s, 2H); <sup>13</sup>C-NMR (125 MHz, CDCl<sub>3</sub>) δ 14.3, 18.0, 19.8, 22.9, 26.3, 29.5, 29.8, 29.9, 31.5, 32.1, 39.6, 53.1, 68.0, 68.3, 114.8, 129.5, 131.7, 158.7, 174.7; HRMS (ESI-TOF)<sup>+</sup> measured for C<sub>46</sub>H<sub>78</sub>N<sub>4</sub>O<sub>4</sub> (M + H)<sup>+</sup>: 751.6101; found 751.6102; Anal. Calcd. for C<sub>46</sub>H<sub>78</sub>N<sub>4</sub>O<sub>4</sub>·H<sub>2</sub>O: C, 71.93; H, 11.17; N, 6.70; found: C, 71.83; H, 10.98; N, 6.90. A small amount of the monoalkylated by-product was also isolated: Yield = 5%; mp 78-82 °C;  $[\alpha]_D^{25} = -2.5$  (c = 0.01, CHCl<sub>3</sub>); IR (ATR) 3299, 2958, 2852, 1631, 1553, 1513, 1467, 1244 cm<sup>-1</sup>; <sup>1</sup>H-NMR (500 MHz, CDCl<sub>3</sub>) δ 0.81 (d, 6H, J = 6.7 Hz), 0.87 (m, 3H), 0.95 (d, 6H, J = 6.0 Hz), 1.30 (m, 12H), 1.43 (m, 2H), 1.65 (m, 2H), 1.76 (td, 1H, J = 6.6, 13.0 Hz), 2.08 (m, 1H), 2.25 (m, 1H), 2.96 (s, 1H), 3.19 (s, 1H), 3.40 (t, 4H, J = 12.5 Hz), 3.55 (d, 1H, J = 12.8 Hz), 3.69 (d, 1H, J = 11.4 Hz), 3.93 (t, 2H, J = 6.5 Hz), 6.84 (m, 2H), 7.19 (m, 2H), 7.61 (s, 2H), 7.69 (s, 2H); <sup>13</sup>C-NMR (75 MHz, CDCl<sub>3</sub>) δ 14.3, 16.4, 18.1, 19.7, 22.9, 26.3, 29.5, 29.6, 29.8, 31.0, 31.4, 32.1, 39.3, 39.8, 52.9, 60.4, 67.9, 68.3, 114.8, 129.6, 131.4, 158.8, 174.7, 175.1; HRMS (ESI-TOF)<sup>+</sup> calcd. for C<sub>29</sub>H<sub>52</sub>N<sub>4</sub>O<sub>3</sub> (M + H)<sup>+</sup>: 505.4118; found 505.4114; Anal. Calcd. for C<sub>29</sub>H<sub>52</sub>N<sub>4</sub>O<sub>3</sub>: C, 69.01; H, 10.38; N, 11.10; found: C, 68.85; H, 10.70; N, 11.43.

**A3Val\_a10obenz.** Yield = 68%; mp 89-94 °C;  $[\alpha]_D^{25} = -35.6$  (c = 0.01, CHCl<sub>3</sub>); IR (ATR) 3323, 2852, 1631, 1547, 1512, 1467 cm<sup>-1</sup>; <sup>1</sup>H-NMR (500 MHz, CDCl<sub>3</sub>) δ 0.88 (t, 6H, J = 6.9 Hz), 0.92 (d, 6H, J = 6.6 Hz), 0.96 (d, 6H, J = 6.9 Hz), 1.30 (m, 24H), 1.44 (m, 4H), 1.67 (m, 2H), 1.76 (m, 4H), 2.15 (td, 2H, J = 13.4, 26.9 Hz), 3.06 (s, 2H), 3.30 (m, 4H), 3.64 (d, 2H, J = 2.9 Hz), 3.77 (d, 2H, J = 12.8 Hz), 3.92 (t, 4H, J = 6.6 Hz), 6.84 (d, 4H, J = 8.4 Hz), 7.25 (d, 4H, J = 8.5 Hz), 7.64 (s, 2H); <sup>13</sup>C-NMR (125 MHz, CDCl<sub>3</sub>) δ 14.3, 18.3, 19.6, 22.9, 26.3, 29.5, 29.6, 29.7, 29.8, 29.9, 30.2, 31.2, 32.1, 36.1, 52.8, 67.8, 68.3, 114.2, 129.9, 130.0, 158.9, 173.9; HRMS (ESI-TOF)<sup>+</sup> calc for C<sub>47</sub>H<sub>80</sub>N<sub>4</sub>O<sub>4</sub> (M + H)<sup>+</sup>: 765.6258; found 765.6264; Anal. Calcd. for C<sub>47</sub>H<sub>80</sub>N<sub>4</sub>O<sub>4</sub>·2H<sub>2</sub>O: C, 70.46; H, 10.57; N, 6.99; found: C, 70.01; H, 10.53; N, 7.13. Monoalkylated by-product: Yield = 15 %; mp 72-78 °C;  $[\alpha]_D^{25} = -26.3$  (c = 0.01, CHCl<sub>3</sub>); IR (ATR) 3299, 2954, 2922, 2867, 1637, 1542, 1509, 1467, 1245 cm<sup>-1</sup>; <sup>1</sup>H-NMR (500 MHz, CDCl<sub>3</sub>) δ 0.86 (m, 3H), 0.94 (d, 6H, J = 6.9 Hz), 0.99 (d, 6H, J = 6.9 Hz), 1.30 (m, 12H), 1.44 (m, 2H), 1.66 (m, 2H), 1.76 (m, 2H), 2.09 (m, 2H), 2.27 (m, 1H), 2.96 (d, 2H, J = 4.6 Hz), 3.29 (m, 4H), 3.57 (d, 1H, J = 12.9 Hz), 3.70 (d, 1H, J = 12.8 Hz), 3.93 (t, 2H, J = 6.6 Hz), 6.84 (d, 2H, J = 8.7 Hz), 7.20 (d, 2H, J = 8.6 Hz), 7.57 (t, 2H, J = 6.3 Hz), 7.69 (d, 2H, J = 5.5 Hz); <sup>13</sup>C-NMR (75 MHz, CDCl<sub>3</sub>) δ 14.3, 16.7, 18.1, 19.8, 22.9, 26.3, 29.5, 29.6, 29.8, 30.2, 31.2, 31.4, 32.1, 36.0, 53.1, 60.5, 68.0, 68.3, 114.8, 129.7, 131.2, 158.7, 173.2, 174.3; HRMS (ESI-TOF)<sup>+</sup> calcd. for C<sub>30</sub>H<sub>54</sub>N<sub>4</sub>O<sub>3</sub> (M + H)<sup>+</sup>: 519.4274; found 519.4273; Anal. Calcd. for C<sub>30</sub>H<sub>54</sub>N<sub>4</sub>O<sub>3</sub>: C, 69.46; H, 10.49; N, 10.80; found: C, 69.27; H, 10.84; N, 10.85.

**A4Val\_a10obenz.** Yield = 66%; mp 85-89 °C;  $[\alpha]_D^{25} = -17.8$  (c = 0.01, CHCl<sub>3</sub>); IR (ATR) 3302, 2921, 2852, 1632, 1549, 1513 cm<sup>-1</sup>; <sup>1</sup>H-NMR (500 MHz, CDCl<sub>3</sub>) δ 0.87 (m, 12H), 0.93 (d, 6H, J = 6.9 Hz), 1.30 (m, 24H), 1.44 (m, 4H), 1.55 (m, 4H), 1.76 (m, 4H), 1.88 (s, 2H), 2.10 (dt, 2H, J = 6.8, 13.5 Hz), 2.97 (d, 2H, J = 4.3 Hz), 3.29 (tdd, 4H, J = 5.98, 12.1, 24.1 Hz), 3.56 (d, 2H, J = 12.9 Hz), 3.68 (d, 2H, J = 12.9 Hz), 3.92 (t, 4H, J = 6.6 Hz), 6.84 (d, 4H, J = 8.4 Hz), 7.17 (d, 4H, J = 8.3 Hz), 7.35 (s, 2H); <sup>13</sup>C-NMR (75 MHz, CDCl<sub>3</sub>) δ 14.3, 18.0, 19.8, 22.9, 26.3, 27.5, 29.5, 29.6, 29.8, 29.9, 31.4, 32.1, 38.7, 53.1, 68.0, 68.3, 114.8, 129.6, 131.4, 158.8, 173.6; HRMS (ESI-TOF)<sup>+</sup> calc for C<sub>48</sub>H<sub>82</sub>N<sub>4</sub>O<sub>4</sub> (M + H)<sup>+</sup>: 779.6414; found 779.6421; Anal. Calcd. for C<sub>48</sub>H<sub>82</sub>N<sub>4</sub>O<sub>4</sub>·H<sub>2</sub>O: C, 72.32; H, 10.62; N, 7.03; found: C, 72.44; H, 10.71; N, 7.02. Monoalkylated by-product: Yield = 19 %; mp 65-67 °C;  $[\alpha]_D^{25} = -25.3$  (c = 0.01, CHCl<sub>3</sub>); IR (ATR) 3300, 2940, 2865, 1637, 1542, 1509, 1457, 1245 cm<sup>-1</sup>; <sup>1</sup>H-NMR (500 MHz, CDCl<sub>3</sub>) δ 0.81 (d, 3H, J = 6.9 Hz), 0.86 (m, 6H), 0.93 (d, 3H, J = 6.9 Hz), 0.97 (d, 3H, J

= 7.0 Hz), 1.31 (m, 12H), 1.43 (m, 2H), 1.53 (m, 4H), 1.76 (m, 2H), 1.88 (s, 1H), 2.08 (m, 1H), 2.27 (qd, 1H, J = 6.7, 13.5 Hz), 2.94 (d, 2H, J = 4.4 Hz), 3.26 (m, 4H), 3.55 (d, 1H, J = 12.8 Hz), 3.66 (d, 1H, J = 12.9 Hz), 3.93 (t, 2H, J = 6.6 Hz), 6.84 (d, 2H, J = 8.4 Hz), 7.16 (d, 2H, J = 8.3 Hz), 7.34 (t, 2H, J = 5.6 Hz), 7.41 (s, 2H); <sup>13</sup>C-NMR (75 MHz, CDCl<sub>3</sub>) δ 14.3, 16.5, 18.0, 19.8, 22.9, 26.3, 27.3, 27.6, 29.5, 29.6, 29.8, 31.0, 31.4, 31.4, 32.1, 38.7, 38.8, 53.1, 60.3, 68.0, 68.3, 114.8, 129.5, 131.6, 158.7, 173.7, 174.2; HRMS (ESI-TOF)<sup>+</sup> calcd. for C<sub>31</sub>H<sub>56</sub>N<sub>4</sub>O<sub>3</sub> (M + H)<sup>+</sup>: 533.4431; found 533.4431; Anal. Calcd. for C<sub>31</sub>H<sub>56</sub>N<sub>4</sub>O<sub>3</sub>·2H<sub>2</sub>O: C, 65.46; H, 10.63; N, 9.85; found: C, 65.52; H, 10.89; N, 9.36.

**A5Val\_a10obenz.** Yield = 38%; mp 95-96 °C; [α]<sub>D</sub><sup>25</sup> = -21.2 (c = 0.01, CHCl<sub>3</sub>); IR (ATR) 3310, 2957, 2921, 2851, 1682, 1641, 1510 cm<sup>-1</sup>; <sup>1</sup>H-NMR (500 MHz, CDCl<sub>3</sub>) δ 0.86 (m, 12H), 0.92 (d, 6H, J = 6.7 Hz), 1.26 (m, 26H), 1.42 (m, 4H), 1.53 (m, 4H), 1.75 (m, 4H), 2.08 (m, 2H), 2.94 (d, 2H, J = 3.8 Hz), 3.25 (m, 4H), 3.55 (d, 2H, J = 12.8 Hz), 3.67 (d, 2H, J = 12.9 Hz), 3.92 (t, 4H, J = 6.3 Hz), 6.84 (d, 4H, J = 8.1 Hz), 7.17 (d, 4H, J = 8.0 Hz), 7.29 (s, 2H); <sup>13</sup>C-NMR (125 MHz, CDCl<sub>3</sub>) δ 14.1, 17.8, 19.6, 22.6, 24.3, 26.0, 29.3, 29.4, 29.4, 29.4, 29.5, 29.5, 31.2, 31.9, 38.7, 52.9, 67.8, 68.0, 114.5, 129.3, 131.4, 158.5, 173.3; HRMS (ESI-TOF)<sup>+</sup> calc for C<sub>49</sub>H<sub>84</sub>N<sub>4</sub>O<sub>4</sub> (M + H)<sup>+</sup>: 793.6571; found 793.6565; Anal. Calcd. for C<sub>49</sub>H<sub>84</sub>N<sub>4</sub>O<sub>4</sub>: C, 74.19; H, 10.67; N, 7.06; found: C, 74.38; H, 10.33; N, 7.36. Monoalkylated by-product: Yield = 19%; mp 67-68 °C; [α]<sub>D</sub><sup>25</sup> = -29.0 (c = 0.01, CHCl<sub>3</sub>); IR (ATR) 3296, 2955, 2920, 2852, 1638, 1549, 1511 cm<sup>-1</sup>; <sup>1</sup>H-NMR (500 MHz, CDCl<sub>3</sub>) δ 0.77 (d, 3H, J = 6.9 Hz), 0.83 (m, 6H), 0.89 (d, 3H, J = 6.9 Hz), 0.92 (d, 3H, J = 7.0 Hz), 1.29 (m, 14H), 1.40 (m, 2H), 1.49 (m, 4H), 1.72 (m, 2H), 2.03 (m, 1H), 2.22 (m, 1H), 2.89 (d, 2H, J = 4.6 Hz), 3.14 (d, 2H, J = 3.8 Hz), 3.21 (m, 4H), 3.51 (d, 1H, J = 12.9 Hz), 3.63 (d, 1H, J = 12.9 Hz), 3.89 (t, 2H, J = 6.6 Hz), 6.81 (d, 2H, J = 8.5 Hz), 7.13 (d, 2H, J = 8.5 Hz), 7.27 (s, 1H), 7.32 (s, 1H); <sup>13</sup>C-NMR (75 MHz, CDCl<sub>3</sub>) δ 14.0, 16.1, 17.8, 19.6, 19.6, 22.6, 24.2, 26.0, 29.2, 29.3, 29.4, 29.4, 29.5, 29.5, 29.5, 30.8, 31.2, 31.8, 38.6, 38.7, 52.8, 60.1, 67.8, 68.0, 114.5, 129.2, 131.5, 158.4, 173.5, 174.2; HRMS (ESI-TOF)<sup>+</sup> calc for C<sub>32</sub>H<sub>58</sub>N<sub>4</sub>O<sub>3</sub> (M + H)<sup>+</sup>: 547.4587; found 547.4594; Anal. Calcd. for C<sub>32</sub>H<sub>58</sub>N<sub>4</sub>O<sub>3</sub>·H<sub>2</sub>O: C, 68.04; H, 10.71; N, 9.92; found: C, 67.92; H, 10.87; N, 9.94.

**A6Val\_a10obenz.** Yield = 67%; mp 93-95 °C; [α]<sub>D</sub><sup>25</sup> = -3.2 (c = 0.01, CHCl<sub>3</sub>); IR (ATR) 3293, 2954, 2922, 2852, 1638, 1553, 1510 cm<sup>-1</sup>; <sup>1</sup>H-NMR (500 MHz, CDCl<sub>3</sub>) δ 0.88 (m, 12H), 0.94 (d, 6H, J = 6.5 Hz), 1.31 (m, 28H), 1.44 (m, 4H), 1.51 (m, 4H), 1.76 (m, 4H), 2.12 (m, 2H), 2.99 (m, 2H), 3.26 (m, 4H), 3.59 (d, 2H, J = 12.8 Hz), 3.70 (d, 2H, J = 12.8 Hz), 3.93 (t, 4H, J = 6.1 Hz), 6.85 (d, 4H, J = 7.9 Hz), 7.19 (d, 4H, J = 7.9 Hz), 7.33 (s, 2H); <sup>13</sup>C-NMR (125 MHz, CDCl<sub>3</sub>) δ 14.1, 17.9, 19.5, 22.6, 26.0, 26.4, 29.3, 29.3, 29.4, 29.5, 29.5, 29.7, 31.1, 31.9, 38.7, 52.7, 67.7, 68.1, 114.6, 129.4, 158.6, 172.9; HRMS (ESI-TOF)<sup>+</sup> calc for C<sub>50</sub>H<sub>86</sub>N<sub>4</sub>O<sub>4</sub> (M + H)<sup>+</sup>: 807.6121; found 807.6129; Anal. Calcd. for C<sub>50</sub>H<sub>86</sub>N<sub>4</sub>O<sub>4</sub>: C, 74.39; H, 10.74; N, 6.94; found: C, 74.44; H, 10.64; N, 6.91. Monoalkylated by-product: Yield = 9%; [α]<sub>D</sub><sup>25</sup> = -5.3 (c = 0.01, CHCl<sub>3</sub>); IR (ATR) 3310, 2953, 2922, 2853, 1641, 1613, 1550, 1510 cm<sup>-1</sup>; <sup>1</sup>H-NMR (500 MHz, CDCl<sub>3</sub>) δ 0.79 (d, 3H, J = 6.9 Hz), 0.84 (m, 6H), 0.91 (d, 3H, J = 7.0 Hz), 0.95 (d, 3H, J = 7.0 Hz), 1.29 (m, 16H), 1.44 (m, 6H), 1.65 (td, 1H, J = 5.6, 11.2 Hz), 1.74 (m, 2H), 2.05 (m, 1H), 2.25 (m, 1H), 2.91 (d, 1H, J = 4.5 Hz), 3.23 (m, 4H), 3.53 (d, 1H, J = 12.9 Hz), 3.65 (d, 1H, J = 12.9 Hz), 3.91 (t, 2H, J = 6.5 Hz), 6.83 (d, 2H, J = 8.4 Hz), 7.15 (d, 2H, J = 8.5 Hz), 7.31 (s, 1H); <sup>13</sup>C-NMR (125 MHz, CDCl<sub>3</sub>) δ 14.1, 16.1, 17.7, 19.6, 19.7, 22.6, 26.0, 26.4, 26.5, 29.3, 29.4, 29.5, 29.5, 29.5, 29.6, 29.7, 30.8, 31.2, 31.8, 38.6, 38.7, 52.9, 60.2, 67.8, 68.0, 114.5, 129.2, 131.6, 158.4, 173.5, 174.3; HRMS (ESI-TOF)<sup>+</sup> calc for C<sub>33</sub>H<sub>60</sub>N<sub>4</sub>O<sub>3</sub> (M + H)<sup>+</sup>: 561.4744; found 561.4752; Anal. Calcd. for C<sub>33</sub>H<sub>60</sub>N<sub>4</sub>O<sub>3</sub>: C, 70.67; H, 10.78; N, 9.99; found: C, 71.00; H, 10.51; N, 10.02.

**A2Phe\_a10obenz.** Yield = 66%; mp 131-136 °C; [α]<sub>D</sub><sup>25</sup> = -33.4 (c = 0.01, CHCl<sub>3</sub>); IR (ATR) 3345, 3278, 2920, 2851, 1652, 1511, 1468 cm<sup>-1</sup>; <sup>1</sup>H-NMR (500 MHz, CDCl<sub>3</sub>) δ 0.89 (t, 6H, J = 6.6 Hz), 1.32 (m, 24H), 1.42 (m, 4H), 1.75 (m, 4H), 2.77 (m, 2H), 3.15 (d, 2H, J = 13.8 Hz),

3.38 (m, 6H), 3.45 (m, 2H), 3.63 (d, 2H,  $J = 13.0$  Hz), 3.89 (t, 4H,  $J = 6.5$  Hz), 6.76 (d, 4H,  $J = 8.4$  Hz), 6.99 (d, 4H,  $J = 6.6$  Hz), 7.13 (d, 4H,  $J = 7.3$  Hz), 7.20 (t, 4H,  $J = 7.2$  Hz), 7.26 (t, 2H,  $J = 7.3$  Hz), 7.43 (s, 2H);  $^{13}\text{C}$ -NMR (125 MHz,  $\text{CDCl}_3$ )  $\delta$  14.1, 22.6, 25.9, 29.1, 29.3, 29.5, 30.2, 31.4, 31.9, 35.1, 38.6, 52.8, 60.2, 68.1, 114.8, 123.9, 124.4, 127.8, 129.0, 129.7, 131.9, 160.1, 171.9; HRMS (ESI-TOF) $^+$  calc for  $\text{C}_{54}\text{H}_{78}\text{N}_4\text{O}_4$  ( $\text{M} + \text{H}$ ) $^+$ : 847.6101; found 847.6115; Anal. Calcd. for  $\text{C}_{54}\text{H}_{78}\text{N}_4\text{O}_4 \cdot 6\text{H}_2\text{O}$ : C, 67.89; H, 9.50; N, 5.86; found: C, 67.85; H, 8.86; N, 5.65. Monoalkylated by-product: Yield = 21%; mp 110-112 °C;  $[\alpha]_{\text{D}}^{25} = -26.3$  ( $c = 0.01$ ,  $\text{CHCl}_3$ ); IR (ATR) 3281, 2922, 2854, 1648, 1509, 1245  $\text{cm}^{-1}$ ;  $^1\text{H}$ -NMR (300 MHz,  $\text{CDCl}_3$ )  $\delta$  0.88 (t, 3H,  $J = 6.6$  Hz), 1.30 (m, 14H), 1.43 (s, 1H), 1.75 (m, 2H), 2.15 (s, 2H), 2.73 (m, 2H), 3.19 (m, 2H), 3.34 (m, 4H), 3.50 (d, 1H,  $J = 13.2$  Hz), 3.59 (m, 1H), 3.65 (d, 1H,  $J = 13.1$  Hz), 3.89 (t, 2H,  $J = 6.6$  Hz), 6.77 (d, 2H,  $J = 8.5$  Hz), 7.00 (d, 2H,  $J = 8.3$  Hz), 7.14 (d, 2H,  $J = 7.5$  Hz), 7.19 (d, 2H,  $J = 7.5$  Hz), 7.23 (m, 4H), 7.29 (m, 2H), 7.52 (s, 2H);  $^{13}\text{C}$ -NMR (75 MHz,  $\text{CDCl}_3$ )  $\delta$  14.3, 22.9, 26.3, 29.5, 29.6, 29.8, 29.9, 30.4, 31.6, 32.1, 39.3, 39.6, 41.1, 52.1, 56.7, 63.1, 68.3, 114.7, 127.1, 127.1, 128.9, 129.0, 129.4, 129.4, 129.5, 137.4, 137.9, 158.7, 164.3, 174.7; HRMS (ESI-TOF) $^+$  calcd. for  $\text{C}_{37}\text{H}_{52}\text{N}_4\text{O}_3$  ( $\text{M} + \text{H}$ ) $^+$ : 601.4117; found 601.4111; Anal. Calcd. for  $\text{C}_{37}\text{H}_{52}\text{N}_4\text{O}_3$ : C, 73.96; H, 8.72; N, 9.32; found: C, 75.61; H, 8.57; N, 9.13.

**A3Phe\_a10obenz.** Yield = 61%; mp 81-83 °C;  $[\alpha]_{\text{D}}^{25} = -50.8$  ( $c = 0.01$ ,  $\text{CHCl}_3$ ); IR (ATR) 3310, 2922, 2852, 1638, 1611, 1541, 1509, 1471, 1245  $\text{cm}^{-1}$ ;  $^1\text{H}$ -NMR (500 MHz,  $\text{CDCl}_3$ )  $\delta$  0.88 (t, 6H,  $J = 6.5$  Hz), 1.27 (m, 24H), 1.43 (m, 4H), 1.58 (m, 2H), 1.68 (s, 2H), 1.75 (m, 4H), 2.75 (dd, 2H,  $J = 9.3$  Hz), 3.18 (m, 6H), 3.37 (dd, 2H,  $J = 4.3, 9.0$  Hz), 3.48 (d, 2H,  $J = 13.1$  Hz), 3.66 (d, 2H,  $J = 13.1$  Hz), 3.91 (t, 4H,  $J = 6.5$  Hz), 6.77 (d, 4H,  $J = 8.3$  Hz), 7.00 (d, 4H,  $J = 8.2$  Hz), 7.16 (d, 4H,  $J = 6.9$  Hz), 7.25 (m, 6H), 7.54 (t, 2H,  $J = 5.3$  Hz);  $^{13}\text{C}$ -NMR (125 MHz,  $\text{CDCl}_3$ )  $\delta$  14.1, 22.6, 26.0, 29.3, 29.4, 29.6, 29.6, 30.0, 31.9, 35.6, 39.3, 52.1, 63.1, 68.1, 114.5, 126.8, 128.7, 129.1, 131.1, 137.5, 158.3, 174.0; HRMS (ESI-TOF) $^+$  calc for  $\text{C}_{55}\text{H}_{80}\text{N}_4\text{O}_4$  ( $\text{M} + \text{H}$ ) $^+$ : 861.6258; found 861.6262; Anal. Calcd. for  $\text{C}_{55}\text{H}_{80}\text{N}_4\text{O}_4$ : C, 76.70; H, 9.36; N, 6.51; found: C, 76.72; H, 9.68; N, 6.25. Monoalkylated by-product: Yield = 19 %; mp 73-76 °C;  $[\alpha]_{\text{D}}^{25} = -19.0$  ( $c = 0.01$ ,  $\text{CHCl}_3$ ); IR (ATR) 3305, 2921, 2850, 1640, 1543, 1510, 1444, 1241  $\text{cm}^{-1}$ ;  $^1\text{H}$ -NMR (300 MHz,  $\text{CDCl}_3$ )  $\delta$  0.88 (t, 3H,  $J = 6.8$  Hz), 1.29 (m, 12H), 1.43 (s, 2H), 1.59 (m, 2H), 1.75 (m, 2H), 2.12 (s, 2H), 2.76 (td, 2H,  $J = 9.4, 13.7$  Hz), 3.19 (m, 6H), 3.39 (dd, 2H,  $J = 4.4, 9.1$  Hz), 3.49 (d, 1H,  $J = 13.1$  Hz), 3.65 (d, 1H,  $J = 13.2$  Hz), 3.90 (m, 2H), 6.77 (d, 2H,  $J = 8.3$  Hz), 6.99 (d, 2H,  $J = 8.3$  Hz), 7.15 (d, 2H,  $J = 7.1$  Hz), 7.26 (m, 8H), 7.56 (s, 1H), 7.63 (s, 1H);  $^{13}\text{C}$ -NMR (125 MHz,  $\text{CDCl}_3$ )  $\delta$  14.1, 22.6, 26.0, 29.3, 29.3, 29.4, 29.5, 29.5, 29.7, 31.9, 35.7, 39.2, 41.0, 52.1, 56.6, 63.0, 68.1, 114.5, 126.8, 128.6, 128.7, 129.1, 129.2, 129.3, 130.8, 137.3, 137.8, 158.4, 174.0, 174.2; HRMS (ESI-TOF) $^+$  calc for  $\text{C}_{38}\text{H}_{54}\text{N}_4\text{O}_3$  ( $\text{M} + \text{H}$ ) $^+$ : 615.4274; found 615.4278; Anal. Calcd. for  $\text{C}_{38}\text{H}_{54}\text{N}_4\text{O}_3 \cdot 4\text{H}_2\text{O}$ : C, 66.44; H, 9.10; N, 8.16; found: C, 66.06; H, 9.01; N, 8.55.

**A4Phe\_a10obenz.** Yield = 74%; mp 100-104 °C;  $[\alpha]_{\text{D}}^{25} = -47.3$  ( $c = 0.01$ ,  $\text{CHCl}_3$ ); IR (ATR) 3332, 3286, 2919, 2851, 1631, 1612, 1534, 1509, 1466  $\text{cm}^{-1}$ ;  $^1\text{H}$ -NMR (500 MHz,  $\text{CDCl}_3$ )  $\delta$  0.89 (t, 6H,  $J = 6.9$  Hz), 1.31 (m, 24H), 1.43 (m, 8H), 1.76 (m, 4H), 2.31 (s, 2H), 2.76 (dd, 2H,  $J = 9.1, 13.8$  Hz), 3.18 (d, 2H,  $J = 4.4$  Hz), 3.24 (m, 4H), 3.40 (dd, 2H,  $J = 4.5, 8.8$  Hz), 3.49 (d, 2H,  $J = 13.1$  Hz), 3.62 (d, 2H,  $J = 13.1$  Hz), 3.89 (t, 4H,  $J = 6.6$  Hz), 6.77 (d, 4H,  $J = 8.5$  Hz), 6.98 (d, 4H,  $J = 8.4$  Hz), 7.15 (d, 4H,  $J = 6.9$  Hz), 7.22 (m, 2H), 7.27 (m, 4H), 7.35 (t, 2H,  $J = 5.6$  Hz);  $^{13}\text{C}$ -NMR (125 MHz,  $\text{CDCl}_3$ )  $\delta$  14.1, 22.7, 26.0, 27.0, 29.3, 29.3, 29.4, 29.5, 29.6, 31.9, 38.6, 39.1, 52.0, 63.0, 68.0, 114.5, 126.8, 128.5, 128.7, 129.1, 129.1, 137.3, 158.4, 173.2; HRMS (ESI-TOF) $^+$  calc for  $\text{C}_{56}\text{H}_{82}\text{N}_4\text{O}_4$  ( $\text{M} + \text{H}$ ) $^+$ : 875.6414; found 875.6419; Anal. Calcd. for  $\text{C}_{56}\text{H}_{82}\text{N}_4\text{O}_4$ : C, 78.17; H, 11.21; N, 5.46; found: C, 77.76; H, 11.30; N, 5.85. Monoalkylated by-product: Yield = 23 %; mp 97-104 °C;  $[\alpha]_{\text{D}}^{25} = -44.6$  ( $c = 0.01$ ,  $\text{CHCl}_3$ ); IR (ATR) 3292, 2920, 2852, 1639, 1529, 1509, 1466, 1244  $\text{cm}^{-1}$ ;  $^1\text{H}$ -NMR (500 MHz,  $\text{CDCl}_3$ )  $\delta$  0.88 (t, 3H,  $J = 6.7$  Hz), 1.29 (m, 12H), 1.44 (m, 6H), 1.75 (m, 2H), 1.99 (m, 3H), 2.72 (m,

2H), 3.18 (m, 2H), 3.24 (m, 4H), 3.36 (dd, 2H,  $J = 4.3, 9.1$  Hz), 3.47 (d, 1H,  $J = 13.1$  Hz), 3.60 (d, 1H,  $J = 13.2$  Hz), 3.90 (t, 2H,  $J = 6.6$  Hz), 6.77 (d, 2H,  $J = 8.5$  Hz), 6.96 (d, 2H,  $J = 8.5$  Hz), 7.14 (d, 2H,  $J = 6.9$  Hz), 7.22 (m, 6H), 7.27 (m, 2H), 7.50 (s, 2H), 7.54 (s, 2H);  $^{13}\text{C}$ -NMR (125 MHz,  $\text{CDCl}_3$ )  $\delta$  14.1, 22.6, 26.0, 26.9, 27.1, 29.3, 29.3, 29.4, 29.5, 29.5, 31.9, 38.6, 38.7, 39.2, 41.0, 52.1, 56.5, 63.0, 68.1, 114.5, 126.8, 126.8, 128.6, 128.7, 129.0, 129.1, 129.3, 131.0, 137.4, 137.9, 158.4, 173.6, 174.1; HRMS (ESI-TOF) $^+$  calcd. for  $\text{C}_{39}\text{H}_{56}\text{N}_4\text{O}_3$  (M + H) $^+$ : 629.4431; found 629.4435; Anal. Calcd. for  $\text{C}_{39}\text{H}_{56}\text{N}_4\text{O}_3$ : C, 75.77; H, 9.20; N, 7.52; found: C, 75.45; H, 9.50; N, 7.63.

**A2Val\_a8.** Yield = 26%; mp 100-105 °C;  $[\alpha]_{\text{D}}^{25} = -65.0$  ( $c = 0.01$ ,  $\text{CHCl}_3$ ); IR (ATR) 3288, 3085, 2957, 2921, 2853, 1632, 1556, 1450  $\text{cm}^{-1}$ ;  $^1\text{H}$ -NMR (500 MHz,  $\text{CDCl}_3$ )  $\delta$  0.87 (m, 12H), 0.97 (d, 6H,  $J = 6.9$  Hz), 1.32 (m, 24H), 1.44 (s, 2H), 2.08 (m, 2H), 2.49 (t, 4H,  $J = 6.9$  Hz), 2.86 (d, 2H,  $J = 3.0$  Hz), 3.39 (m, 4H), 7.64 (s, 2H);  $^{13}\text{C}$ -NMR (75 MHz,  $\text{CDCl}_3$ )  $\delta$  14.3, 18.0, 19.8, 22.9, 27.5, 29.5, 29.7, 30.4, 31.5, 32.0, 39.4, 49.9, 68.7, 175.0; HRMS (ESI-TOF) $^+$  calc for  $\text{C}_{28}\text{H}_{58}\text{N}_4\text{O}_2$  (M + H) $^+$ : 483.4638; found 483.4635; Anal. Calcd. for  $\text{C}_{28}\text{H}_{58}\text{N}_4\text{O}_2$ : C, 69.66; H, 12.11; N, 11.60; found: C, 70.00; H, 12.29; N, 11.30.

**A3Val\_a8.** Yield = 21%; mp 89-90 °C;  $[\alpha]_{\text{D}}^{25} = -37.8$  ( $c = 0.01$ ,  $\text{CHCl}_3$ ); IR (ATR) 3284, 2955, 2923, 2854, 1638, 1557, 1542  $\text{cm}^{-1}$ ;  $^1\text{H}$ -NMR (500 MHz,  $\text{CDCl}_3$ )  $\delta$  0.87 (t, 6H,  $J = 6.6$  Hz), 0.98 (d, 12H,  $J = 6.9$  Hz), 1.27 (m, 20H), 1.36 (s, 2H), 1.44 (td, 4H,  $J = 6.1, 12.4$  Hz), 1.67 (m, 2H), 2.10 (m, 2H), 2.51 (m, 4H), 2.86 (d, 2H,  $J = 4.5$  Hz), 3.29 (m, 4H), 7.57 (s, 2H);  $^{13}\text{C}$ -NMR (75 MHz,  $\text{CDCl}_3$ )  $\delta$  14.3, 18.0, 19.9, 22.8, 27.5, 29.5, 29.7, 30.4, 31.5, 32.0, 35.9, 49.9, 68.9, 174.6; HRMS (ESI-TOF) $^+$  calc for  $\text{C}_{29}\text{H}_{60}\text{N}_4\text{O}_2$  (M + H) $^+$ : 497.4795; found 497.4799; Anal. Calcd. for  $\text{C}_{29}\text{H}_{60}\text{N}_4\text{O}_2$ : C, 70.11; H, 12.17; N, 11.28; found: C, 70.45; H, 12.40; N, 10.93.

**A4Val\_a8.** Yield = 32%; mp 84-87 °C;  $[\alpha]_{\text{D}}^{25} = -30.3$  ( $c = 0.01$ ,  $\text{CHCl}_3$ ); IR (ATR) 3281, 2921, 2851, 1637, 1542, 1509, 1466, 1245  $\text{cm}^{-1}$ ;  $^1\text{H}$ -NMR (500 MHz,  $\text{CDCl}_3$ )  $\delta$  0.87 (m, 12H), 0.97 (m, 6H), 1.29 (m, 24H), 1.43 (m, 2H), 1.54 (m, 4H), 2.10 (m, 2H), 2.46 (m, 4H), 2.81 (d, 1H,  $J = 4.3$  Hz), 2.86 (d, 1H,  $J = 4.3$  Hz), 3.23 (m, 2H), 3.33 (m, 2H), 7.35 (m, 2H);  $^{13}\text{C}$ -NMR (125 MHz,  $\text{CDCl}_3$ )  $\delta$  14.0, 17.6, 19.6, 22.6, 27.2, 27.3, 29.2, 29.4, 30.2, 31.2, 31.8, 38.4, 49.7, 68.6, 173.9; HRMS (ESI-TOF) $^+$  calc for  $\text{C}_{30}\text{H}_{62}\text{N}_4\text{O}_2$  (M + H) $^+$ : 511.4951; found 511.4958; Anal. Calcd. for  $\text{C}_{30}\text{H}_{62}\text{N}_4\text{O}_2$ : C, 70.54; H, 12.23; N, 10.97; found: C, 70.45; H, 12.57; N, 10.52.

**A4Ala\_a10obenz.** Yield = 48%; mp 101-103 °C;  $[\alpha]_{\text{D}}^{25} = 20.2$  ( $c = 0.01$ ,  $\text{CHCl}_3$ ); IR (ATR) 3299, 2952, 2918, 2850, 1638, 1622, 1549, 1511  $\text{cm}^{-1}$ ;  $^1\text{H}$ -NMR (500 MHz,  $\text{CDCl}_3$ )  $\delta$  0.81 (t, 6H,  $J = 6.9$  Hz), 1.21 (m, 28H), 1.37 (m, 4H), 1.46 (m, 6H), 1.69 (m, 4H), 3.14 (q, 2H,  $J = 6.9$  Hz), 3.19 (q, 4H,  $J = 5.9$  Hz), 3.55 (d, 2H,  $J = 12.9$  Hz), 3.55 (d, 2H,  $J = 13.0$  Hz), 3.85 (t, 4H,  $J = 6.6$  Hz), 6.77 (d, 4H,  $J = 8.5$  Hz), 7.09 (d, 4H,  $J = 8.5$  Hz), 7.25 (t, 2H,  $J = 5.8$  Hz);  $^{13}\text{C}$ -NMR (125 MHz,  $\text{CDCl}_3$ )  $\delta$  14.1, 19.9, 22.6, 26.0, 27.2, 29.3, 29.4, 29.4, 29.5, 29.5, 31.9, 38.5, 52.1, 57.7, 68.1, 114.6, 129.1, 131.4, 158.4, 174.9; HRMS (ESI-TOF) $^+$  calc for  $\text{C}_{44}\text{H}_{74}\text{N}_4\text{O}_4$  (M + H) $^+$ : 723.5788; found 723.5790; Anal. Calcd. for  $\text{C}_{44}\text{H}_{74}\text{N}_4\text{O}_4$ : C, 73.09; H, 10.32; N, 7.75; found: C, 72.94; H, 10.11; N, 7.37. Monoalkylated by-product: Yield = 26%; mp 79-82 °C;  $[\alpha]_{\text{D}}^{25} = 60.7$  ( $c = 0.01$ ,  $\text{CHCl}_3$ ); IR (ATR) 3290, 2923, 2857, 1640, 1543, 1519, 1466  $\text{cm}^{-1}$ ;  $^1\text{H}$ -NMR (500 MHz,  $\text{CDCl}_3$ )  $\delta$  0.75 (t, 3H,  $J = 6.8$  Hz), 1.14 (m, 18H), 1.31 (m, 2H), 1.39 (m, 4H), 1.62 (m, 2H), 1.85 (s, 3H), 3.07 (m, 5H), 3.30 (dd, 1H,  $J = 6.9, 13.8$  Hz), 3.48 (d, 1H,  $J = 12.9$  Hz), 3.52 (d, 1H,  $J = 13.0$  Hz), 3.79 (t, 2H,  $J = 6.5$  Hz), 6.70 (d, 2H,  $J = 8.4$  Hz), 7.04 (d, 2H,  $J = 8.4$  Hz), 7.36 (t, 1H,  $J = 5.7$  Hz), 7.42 (s, 1H);  $^{13}\text{C}$ -NMR (125 MHz,  $\text{CDCl}_3$ )  $\delta$  14.0, 19.6, 21.6, 22.5, 25.9, 26.8, 27.0, 29.1, 29.2, 29.2, 29.4, 29.4, 31.7, 38.4, 38.5, 50.6, 51.8, 57.4, 67.9, 114.4, 129.0, 131.4, 158.2, 175.0, 175.8; ; HRMS (ESI-TOF) $^+$  calc for  $\text{C}_{27}\text{H}_{48}\text{N}_4\text{O}_3$  (M + H) $^+$ : 477.3805; found 477.3807; Anal. Calcd. for  $\text{C}_{27}\text{H}_{48}\text{N}_4\text{O}_3$ : C, 68.03; H, 10.15; N, 11.75; found: C, 68.43; H, 10.38; N, 11.57.

**A4Leu\_a10obenz.** Yield = 63%; mp 98-99 °C;  $[\alpha]_{\text{D}}^{25} = -19.3$  (c = 0.01, CHCl<sub>3</sub>); IR (ATR) 3329, 2956, 2921, 2852, 1643, 1629, 1546, 1509 cm<sup>-1</sup>; <sup>1</sup>H-NMR (500 MHz, CDCl<sub>3</sub>) δ 0.83 (d, 6H, J = 6.2 Hz), 0.89 (m, 12H), 1.38 (m, 28H), 1.60 (m, 6H), 1.76 (m, 4H), 3.17 (dd, 2H, J = 4.2, 8.3 Hz), 3.27 (m, 4H), 3.56 (d, 2H, J = 12.9 Hz), 3.67 (d, 2H, J = 12.9 Hz), 3.91 (t, 4H, J = 6.3 Hz), 6.84 (d, 4H, J = 8.1 Hz), 7.17 (d, 4H, J = 8.1 Hz), 7.38 (s, 2H); <sup>13</sup>C-NMR (125 MHz, CDCl<sub>3</sub>) δ 14.1, 21.8, 22.6, 23.2, 25.1, 26.0, 27.2, 29.3, 29.3, 29.4, 29.5, 29.6, 31.9, 38.5, 42.9, 52.2, 60.8, 68.1, 114.6, 129.3, 131.0, 158.5, 174.5; HRMS (ESI-TOF)<sup>+</sup> calc for C<sub>50</sub>H<sub>86</sub>N<sub>4</sub>O<sub>4</sub> (M + H)<sup>+</sup>: 807.6727; found 807.6735; Anal. Calcd. for C<sub>50</sub>H<sub>86</sub>N<sub>4</sub>O<sub>4</sub>·H<sub>2</sub>O: C, 72.77; H, 10.75; N, 6.75; found: C, 72.73; H, 10.68; N, 6.37. Monoalkylated by-product: Yield = 12%; mp 65-70 °C;  $[\alpha]_{\text{D}}^{25} = -192.6$  (c = 0.01, CHCl<sub>3</sub>); IR (ATR) 3326, 2925, 2858, 1631, 1541, 1518 cm<sup>-1</sup>; <sup>1</sup>H-NMR (500 MHz, CDCl<sub>3</sub>) δ 0.83 (m, 15H), 1.38 (m, 15H), 1.53 (m, 4H), 1.63 (m, 5H), 2.06 (s, 3H), 3.11 (m, 1H), 3.23 (m, 4H), 3.32 (m, 1H), 3.52 (d, 1H, J = 12.9 Hz), 3.63 (d, 1H, J = 12.6 Hz), 3.90 (t, 2H, J = 6.3 Hz), 6.81 (d, 2H, J = 8.1 Hz), 7.13 (d, 2H, J = 8.1 Hz), 7.34 (s, 1H), 7.40 (s, 1H); <sup>13</sup>C-NMR (125 MHz, CDCl<sub>3</sub>) δ 15.8, 23.2, 23.5, 24.4, 25.0, 25.1, 26.6, 26.8, 27.8, 28.7, 29.0, 31.0, 31.0, 31.1, 31.3, 31.3, 33.6, 40.2, 40.3, 44.8, 45.9, 54.0, 55.3, 62.6, 69.8, 116.3, 130.9, 133.2, 160.2, 176.7, 177.3; HRMS (ESI-TOF)<sup>+</sup> calc for C<sub>33</sub>H<sub>60</sub>N<sub>4</sub>O<sub>3</sub> (M + H)<sup>+</sup>: 561.4744; found 561.4750; Anal. Calcd. for C<sub>33</sub>H<sub>60</sub>N<sub>4</sub>O<sub>3</sub>: C, 70.67; H, 10.78; N, 9.99; found: C, 70.73; H, 10.88; N, 10.02.

**A4Val\_a1obenz.** Yield = 77%; mp 115-117 °C;  $[\alpha]_{\text{D}}^{25} = -36.1$  (c = 0.01, CHCl<sub>3</sub>); IR (ATR) 3303, 2934, 2822, 1634, 1547, 1513, 1455, 1364, 1298, 1242 cm<sup>-1</sup>; <sup>1</sup>H-NMR (500 MHz, CDCl<sub>3</sub>) δ 0.86 (d, 6H, J = 6.8 Hz), 0.93 (d, 6H, J = 6.8 Hz), 1.53 (m, 4H), 2.09 (dd, 2H, J = 6.4, 11.5 Hz), 2.96 (d, 2H, J = 4.1 Hz), 3.27 (dd, 4H, J = 5.9, 14.8 Hz), 3.57 (d, 2H, J = 12.9), 3.68 (d, 2H, J = 12.9 Hz), 3.78 (s, 6H), 6.85 (d, 4H, J = 8.2 Hz), 7.18 (d, 4H, J = 8.2 Hz), 7.33 (s, 2H); <sup>13</sup>C-NMR (125 MHz, CDCl<sub>3</sub>) δ 17.8, 19.5, 27.3, 31.2, 38.5, 52.8, 55.2, 67.7, 113.9, 129.4, 131.4, 158.9, 173.3; HRMS (ESI-TOF)<sup>+</sup> calc for C<sub>30</sub>H<sub>46</sub>N<sub>4</sub>O<sub>4</sub> (M + H)<sup>+</sup>: 527.3597; found 527.3596; Anal. Calcd. for C<sub>30</sub>H<sub>46</sub>N<sub>4</sub>O<sub>4</sub>: C, 68.41; H, 8.80; N, 10.64; found: C, 68.64; H, 8.26; N, 10.34.

**A4Val\_a4obenz.** Yield = 70%; mp 98-100 °C;  $[\alpha]_{\text{D}}^{25} = -28.95$  (c = 0.01, CHCl<sub>3</sub>); IR (ATR) 3307, 2939, 2871, 1633, 1544, 1518, 1459 cm<sup>-1</sup>; <sup>1</sup>H-NMR (500 MHz, CDCl<sub>3</sub>) δ 0.84 (d, 6H, J = 6.9 Hz), 0.93 (m, 12H), 1.46 (q, 4H, J = 7.4, 14.7 Hz), 1.52 (m, 4H), 1.73 (q, 4H, J = 6.5, 14.3 Hz), 1.84 (s, 2H), 2.06 (q, 2H, J = 6.9, 11.6 Hz), 2.92 (d, 2H, J = 4.6 Hz), 3.26 (q, 4H, J = 6.2, 13.1 Hz), 3.53 (d, 2H, J = 12.9 Hz), 3.65 (d, 2H, J = 12.9 Hz), 3.91 (t, 4H, J = 6.5 Hz), 6.82 (d, 4H, J = 8.6 Hz), 7.15 (d, 4H, J = 8.6 Hz), 7.33 (t, 2H, J = 5.7 Hz); <sup>13</sup>C-NMR (125 MHz, CDCl<sub>3</sub>) δ 13.8, 17.8, 19.2, 19.6, 27.3, 31.2, 31.3, 38.5, 52.9, 67.7, 67.8, 114.5, 129.3, 131.4, 158.4, 173.5; HRMS (ESI-TOF)<sup>+</sup> calc for C<sub>36</sub>H<sub>58</sub>N<sub>4</sub>O<sub>4</sub> (M + H)<sup>+</sup>: 611.4536; found 611.4538; Anal. Calcd. for C<sub>36</sub>H<sub>58</sub>N<sub>4</sub>O<sub>4</sub>: C, 70.78; H, 9.57; N, 9.17; found: C, 71.01; H, 9.43; N, 9.19. Monoalkylated by-product: Yield = 12%; mp 65-68 °C;  $[\alpha]_{\text{D}}^{25} = -36.41$  (c = 0.01, CHCl<sub>3</sub>); IR (ATR) 3294, 3083, 2952, 2871, 1635, 1546, 1518 cm<sup>-1</sup>; <sup>1</sup>H-NMR (500 MHz, CDCl<sub>3</sub>) δ 0.80 (d, 3H, J = 6.9 Hz), 0.85 (d, 3H, J = 6.9 Hz), 0.94 (m, 9H), 1.47 (m, 2H), 1.53 (m, 4H), 1.74 (m, 5H), 2.07 (m, 1H), 2.25 (m, 1H), 2.92 (d, 1H, J = 4.5 Hz), 3.20 (m, 1H), 3.27 (m, 4H), 3.54 (d, 1H, J = 12.9 Hz), 3.65 (d, 1H, J = 12.9 Hz), 3.93 (t, 2H, J = 6.5 Hz), 6.84 (d, 2H, J = 8.6 Hz), 7.16 (d, 2H, J = 8.5 Hz), 7.33 (t, 1H, J = 5.7 Hz), 7.39 (s, 1H); <sup>13</sup>C-NMR (125 MHz, CDCl<sub>3</sub>) δ 13.8, 16.1, 17.7, 19.2, 19.6, 19.6, 27.1, 27.3, 30.8, 31.2, 31.3, 38.5, 38.5, 52.9, 60.1, 67.7, 67.8, 114.5, 129.2, 131.5, 158.4, 173.6, 174.2; HRMS (ESI-TOF)<sup>+</sup> calc for C<sub>25</sub>H<sub>44</sub>N<sub>4</sub>O<sub>3</sub> (M + H)<sup>+</sup>: 449.3492; found 449.3500; Anal. Calcd. for C<sub>25</sub>H<sub>44</sub>N<sub>4</sub>O<sub>3</sub>: C, 66.93; H, 9.89; N, 12.49; found: C, 66.98; H, 9.52; N, 12.26.

### Copies of the NMR and ESI-MS spectra A2Val\_a10benz (1)

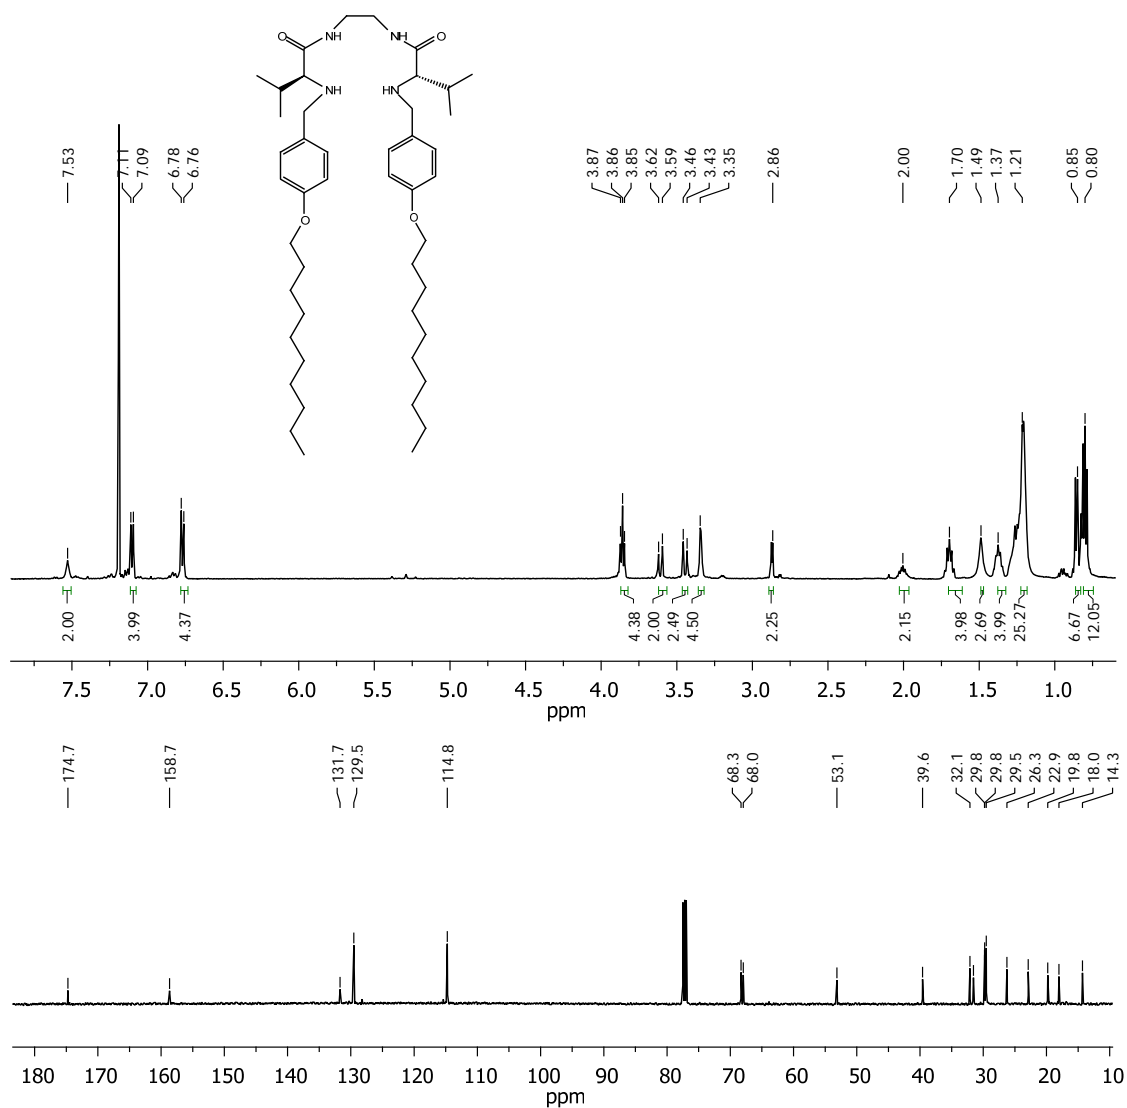

scic\_sl\_14U (U.U15)Is (1.UU.U.U1) C<sub>46</sub>H<sub>78</sub>N<sub>4</sub>O<sub>4</sub>H  
5.80e12

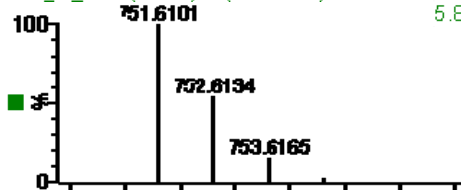

scic\_sl\_140 76 (0.818) Cm (84:78) 1: TOF MS ES+  
1.03e3

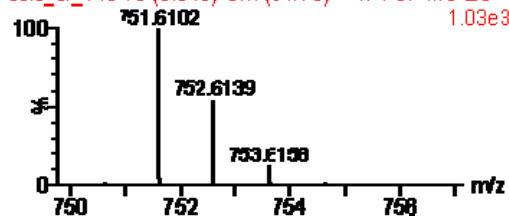



A2Val\_a10benz\_m (1)<sup>b</sup>

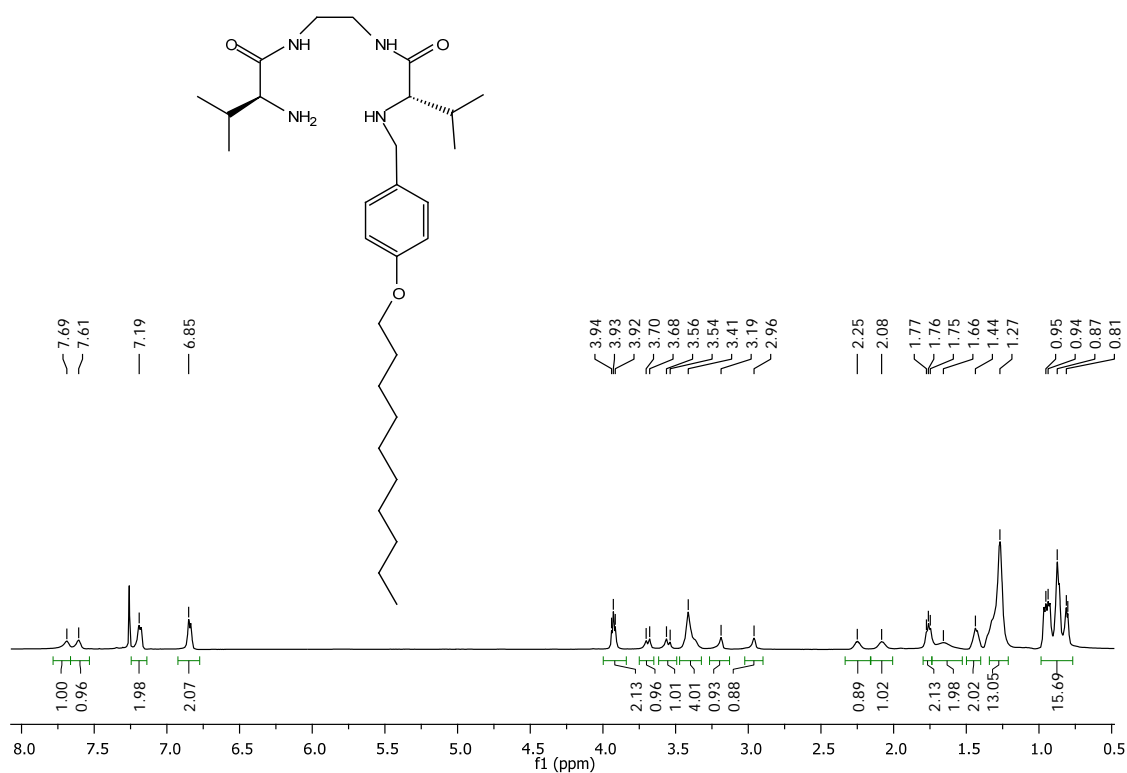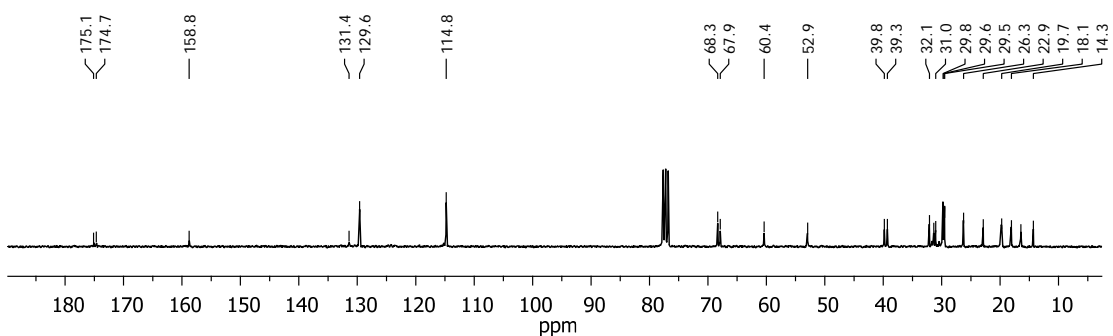

scic\_sl\_141 (U.U13) Is ('.UU.U.U1; C29H52N4O3) 7.04e-2

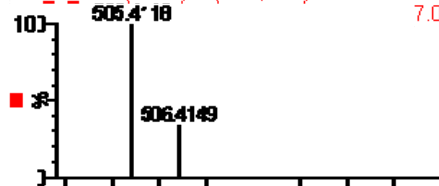

scic\_sl\_141 36 (0.392) Cm (34:43) 1: TOF MS ES+ 7.11e3

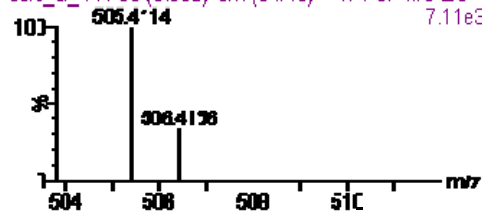

### A3Val\_a10obenz (2)

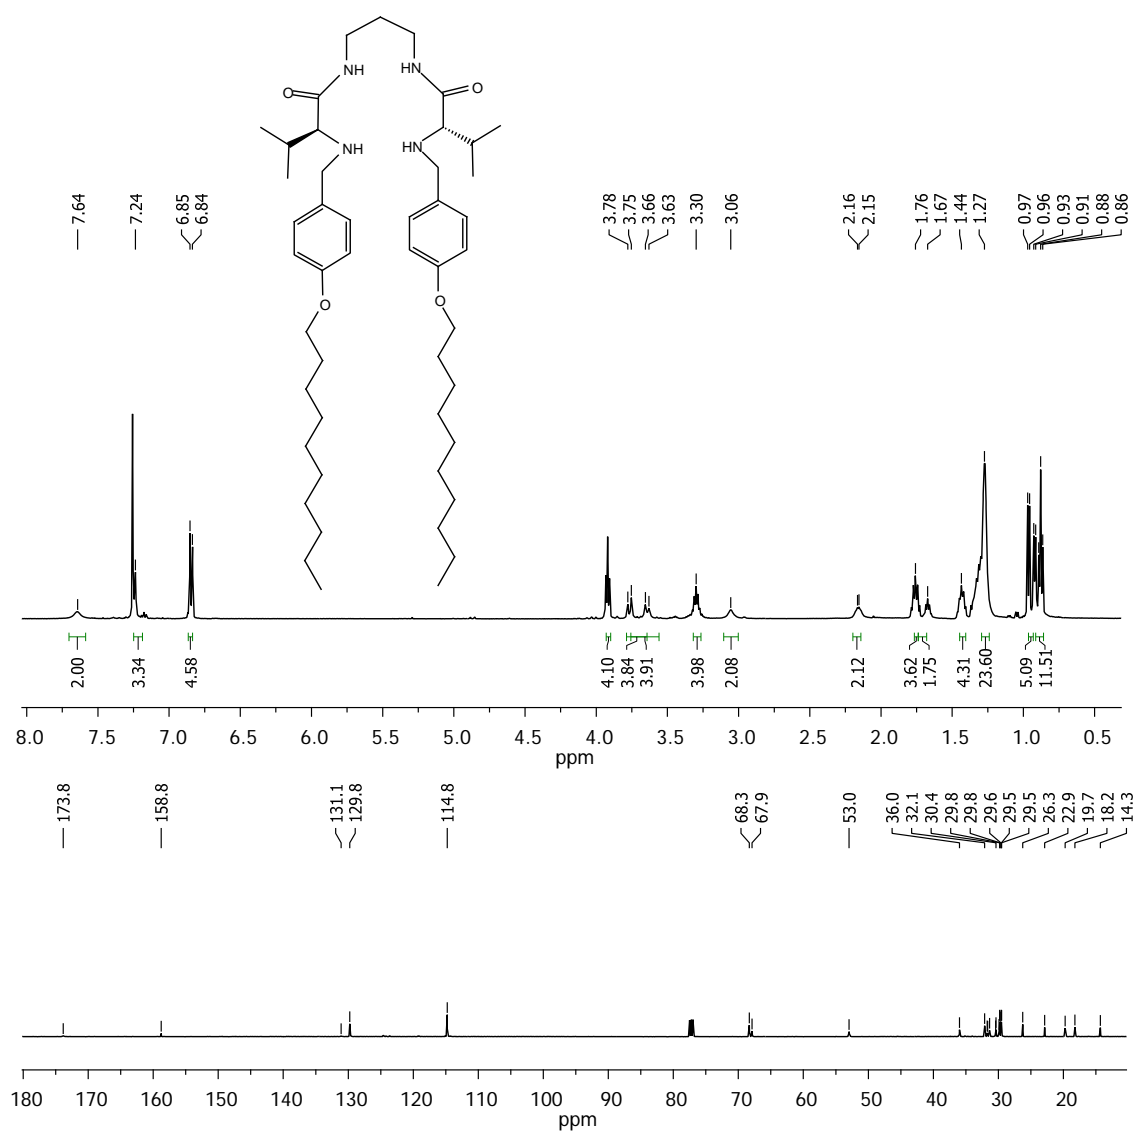

scie\_sl\_213 (0.016) E (1.00,0.01) C47H80N4O4+ 0.73e12

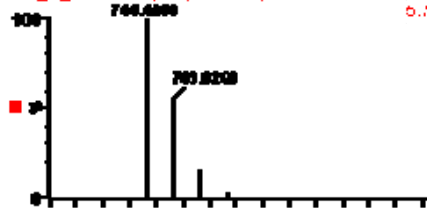

scie\_sl\_213 72 (0.778) Cm (72:75) : TOF MSES+ 908e3

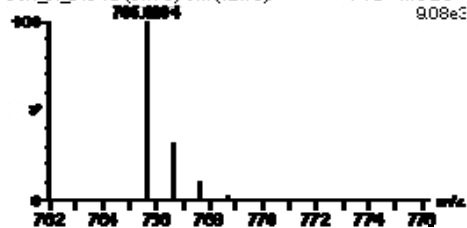

A3Val\_a10benz\_m (2)<sup>b</sup>

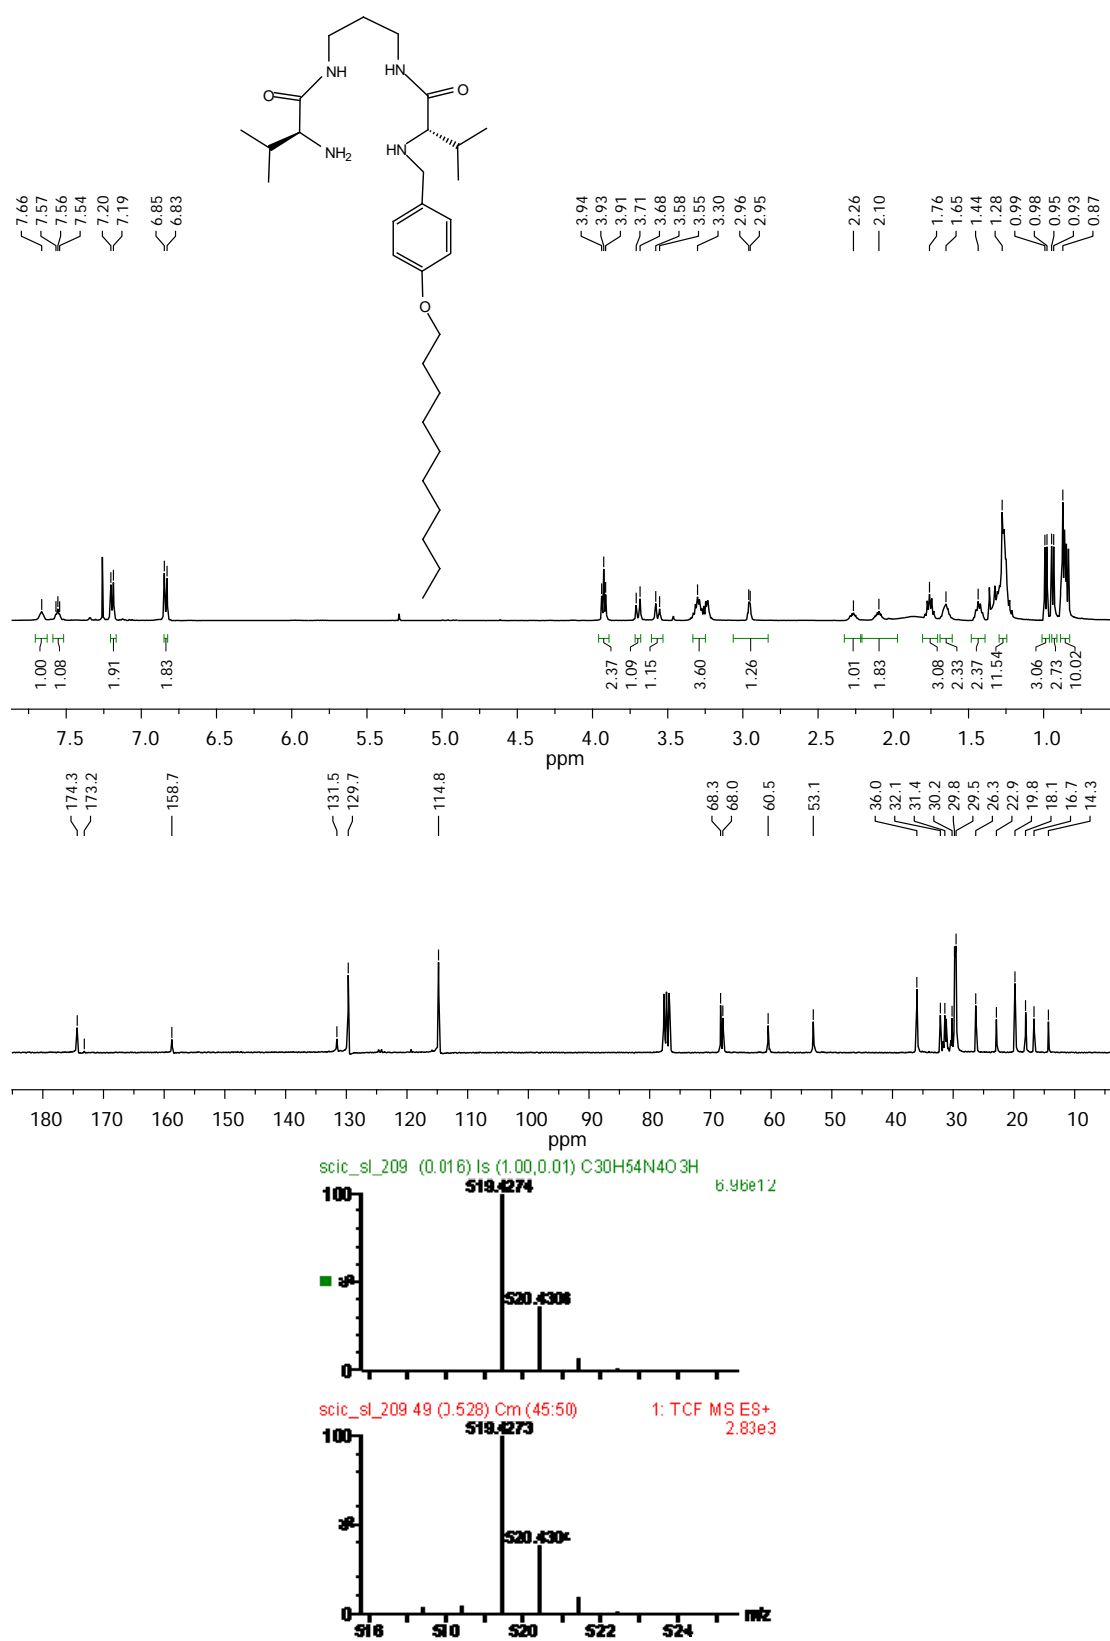

A4Val\_a10obenz (3)

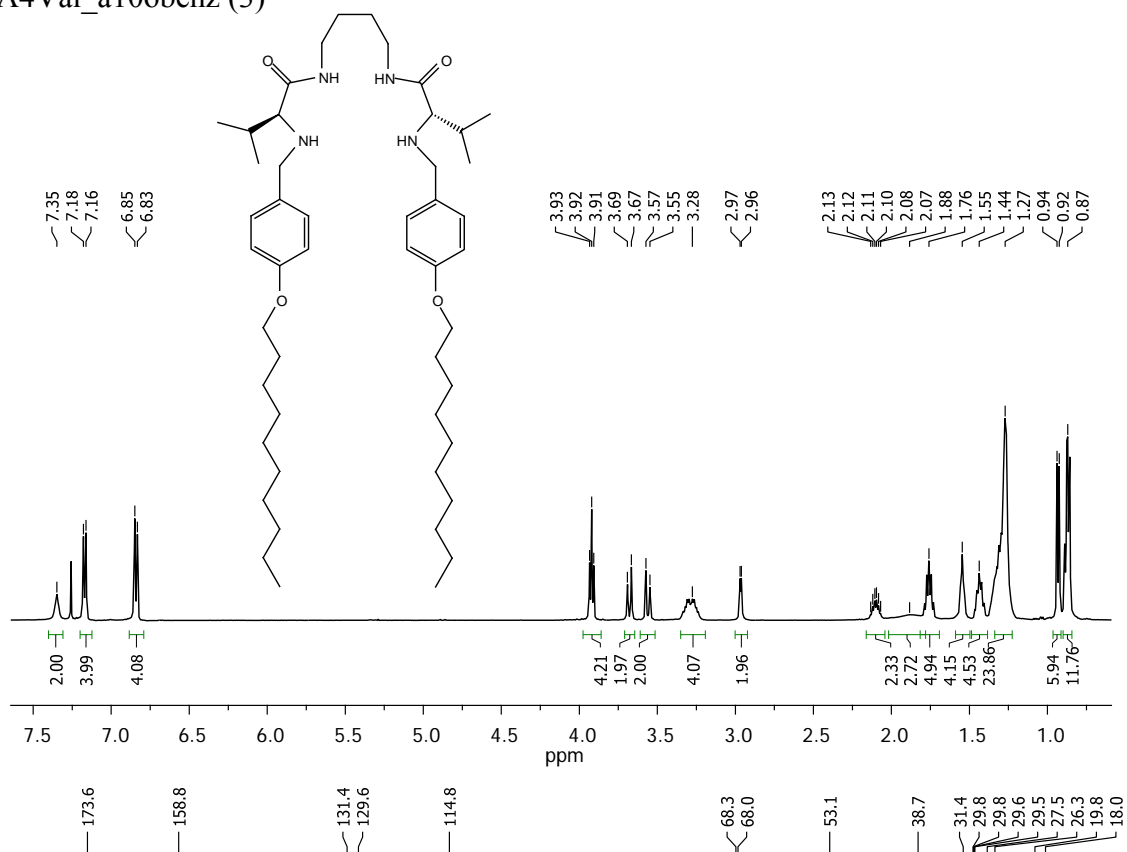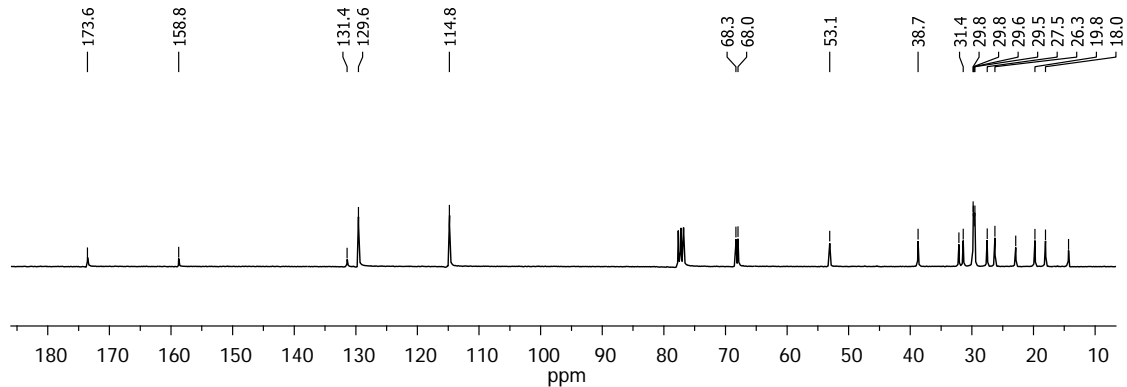

scic\_sl\_144 (0.015) Is (1.00,0.01) C<sub>48</sub>H<sub>82</sub>N<sub>4</sub>O<sub>4</sub>H 5.67e12

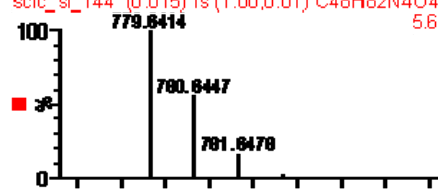

scic\_sl\_144 68 (0.730) Cm (53:68) 1: TOF MS ES+ 9.67e3

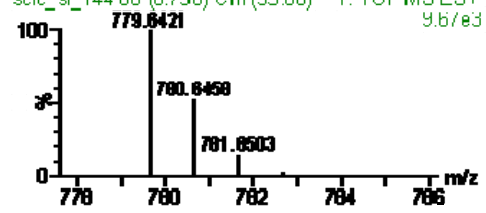

A4Val\_a10benz\_m (3)<sup>b</sup>

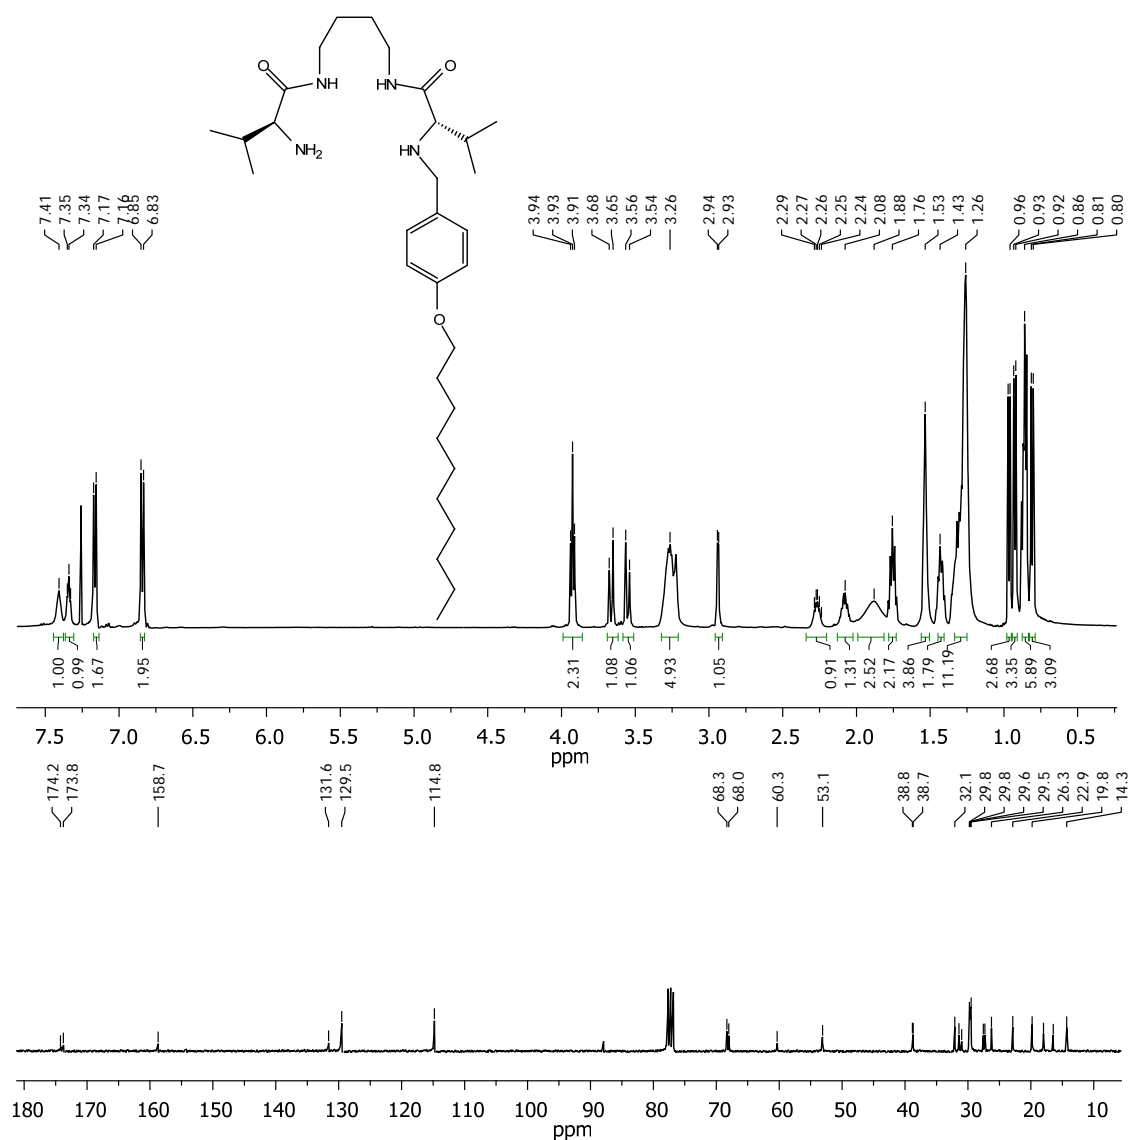

scic\_sl\_142 (0.015) ls (1.00,0.01) C<sub>31</sub>H<sub>56</sub>N<sub>4</sub>O<sub>3</sub>H  
6.88e12

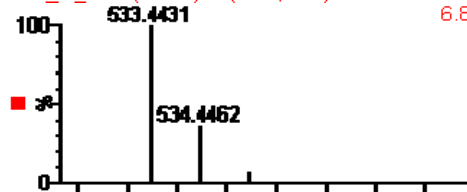

scic\_sl\_142 62 (0.667) Cm (61:70) 1: TOF MS ES+  
1.03e4

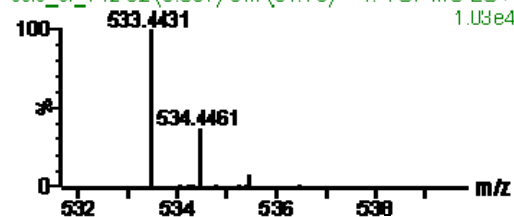

A5Val\_a10benz (4)

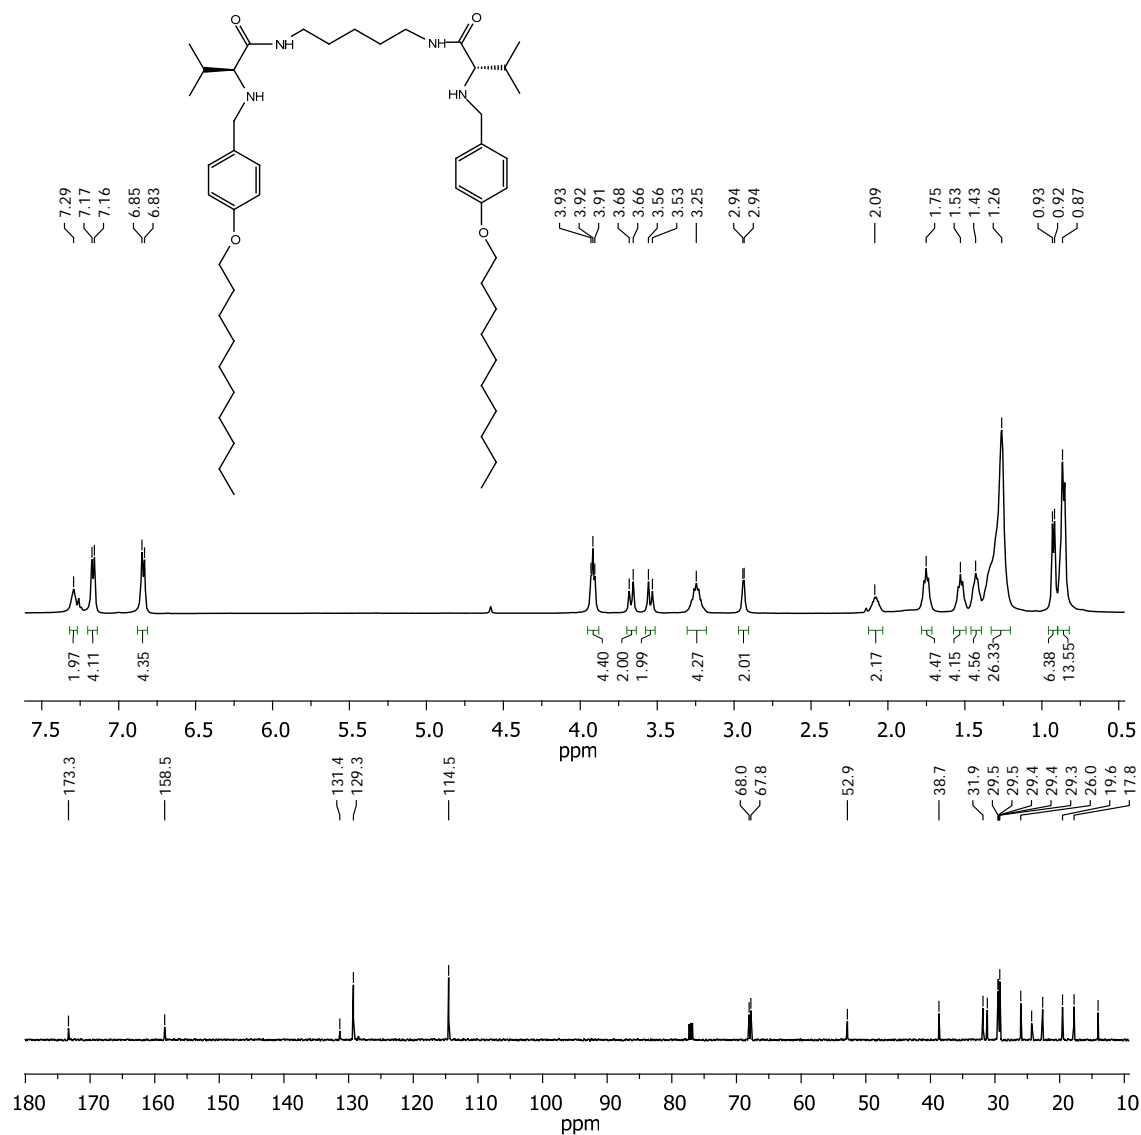

scic\_sl\_198 (0.016) Is (1.00,0.01) C49H84N4O4H 5.60e12

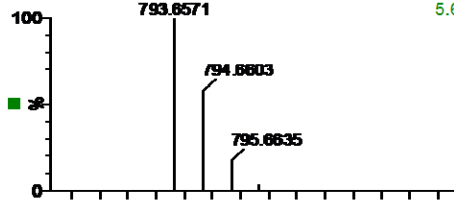

scic\_sl\_198 89 (0.962) Cm (71:89) 1: TOF MS ES+ 1.47e4

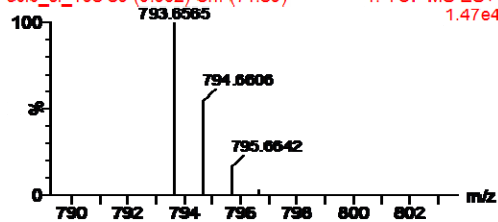

A5Val\_a10obenz\_m (4)<sup>b</sup>

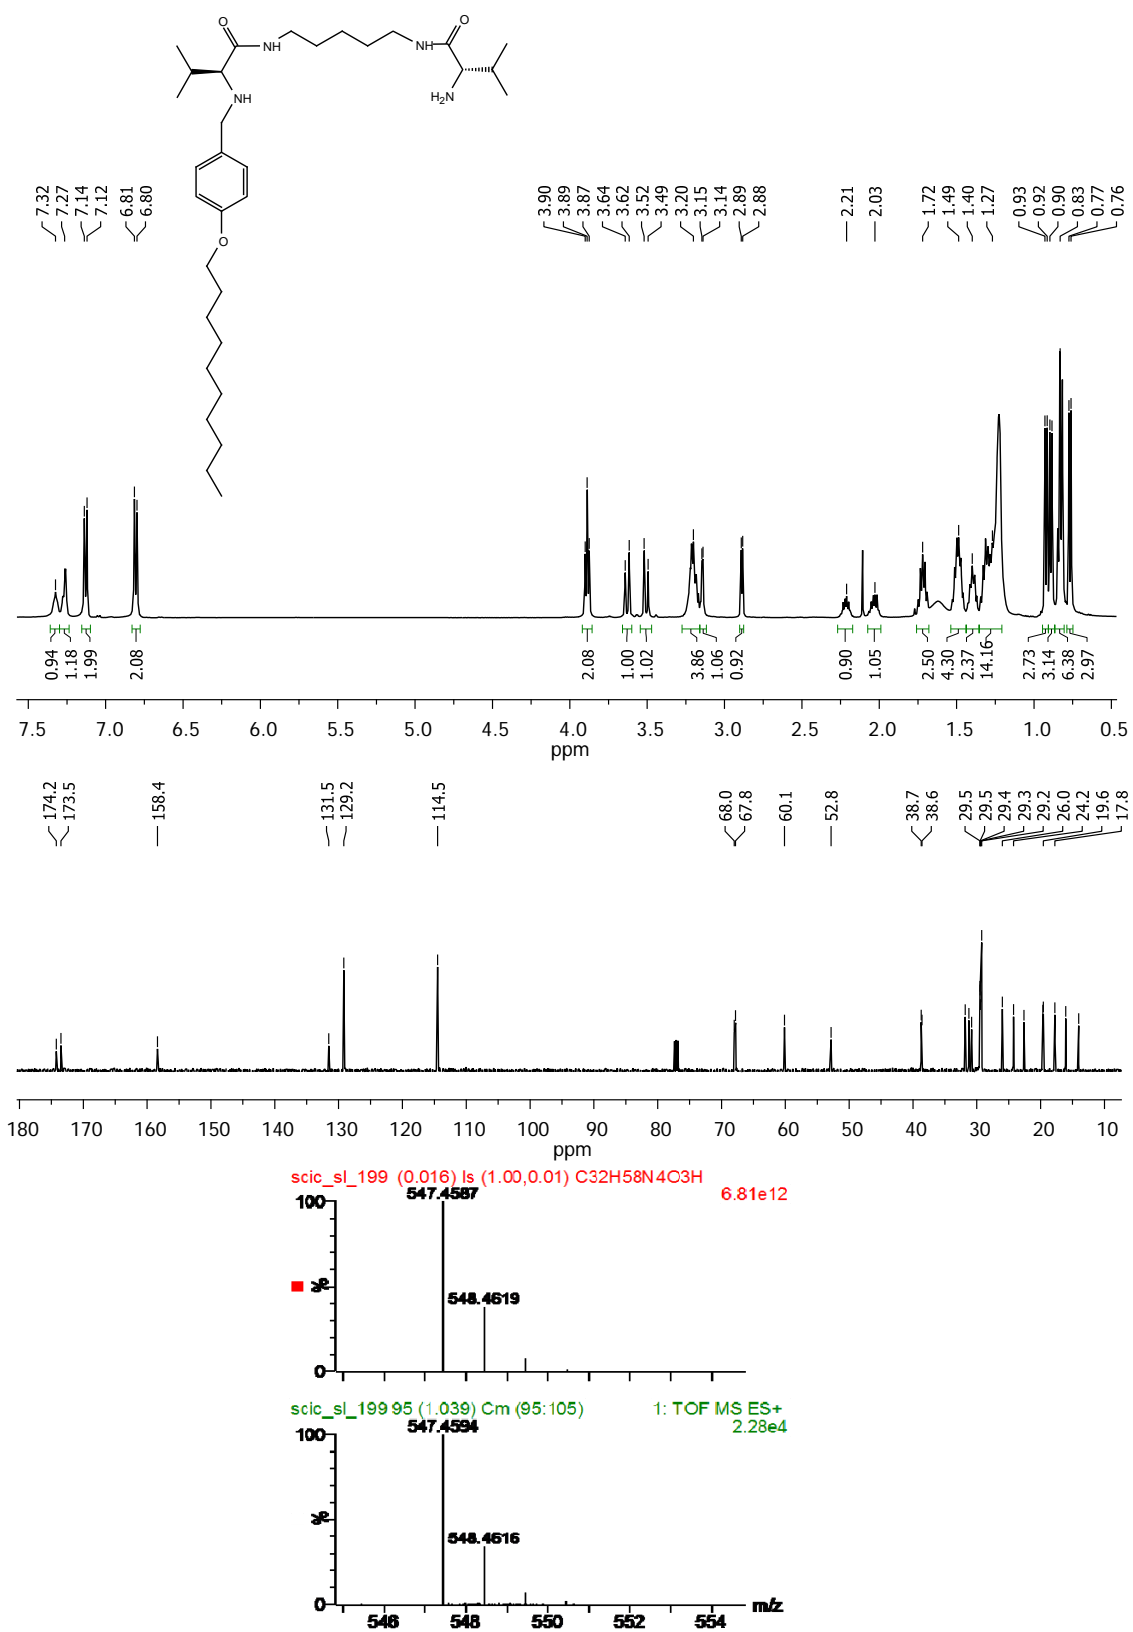

### A6Val\_a10benz (5)

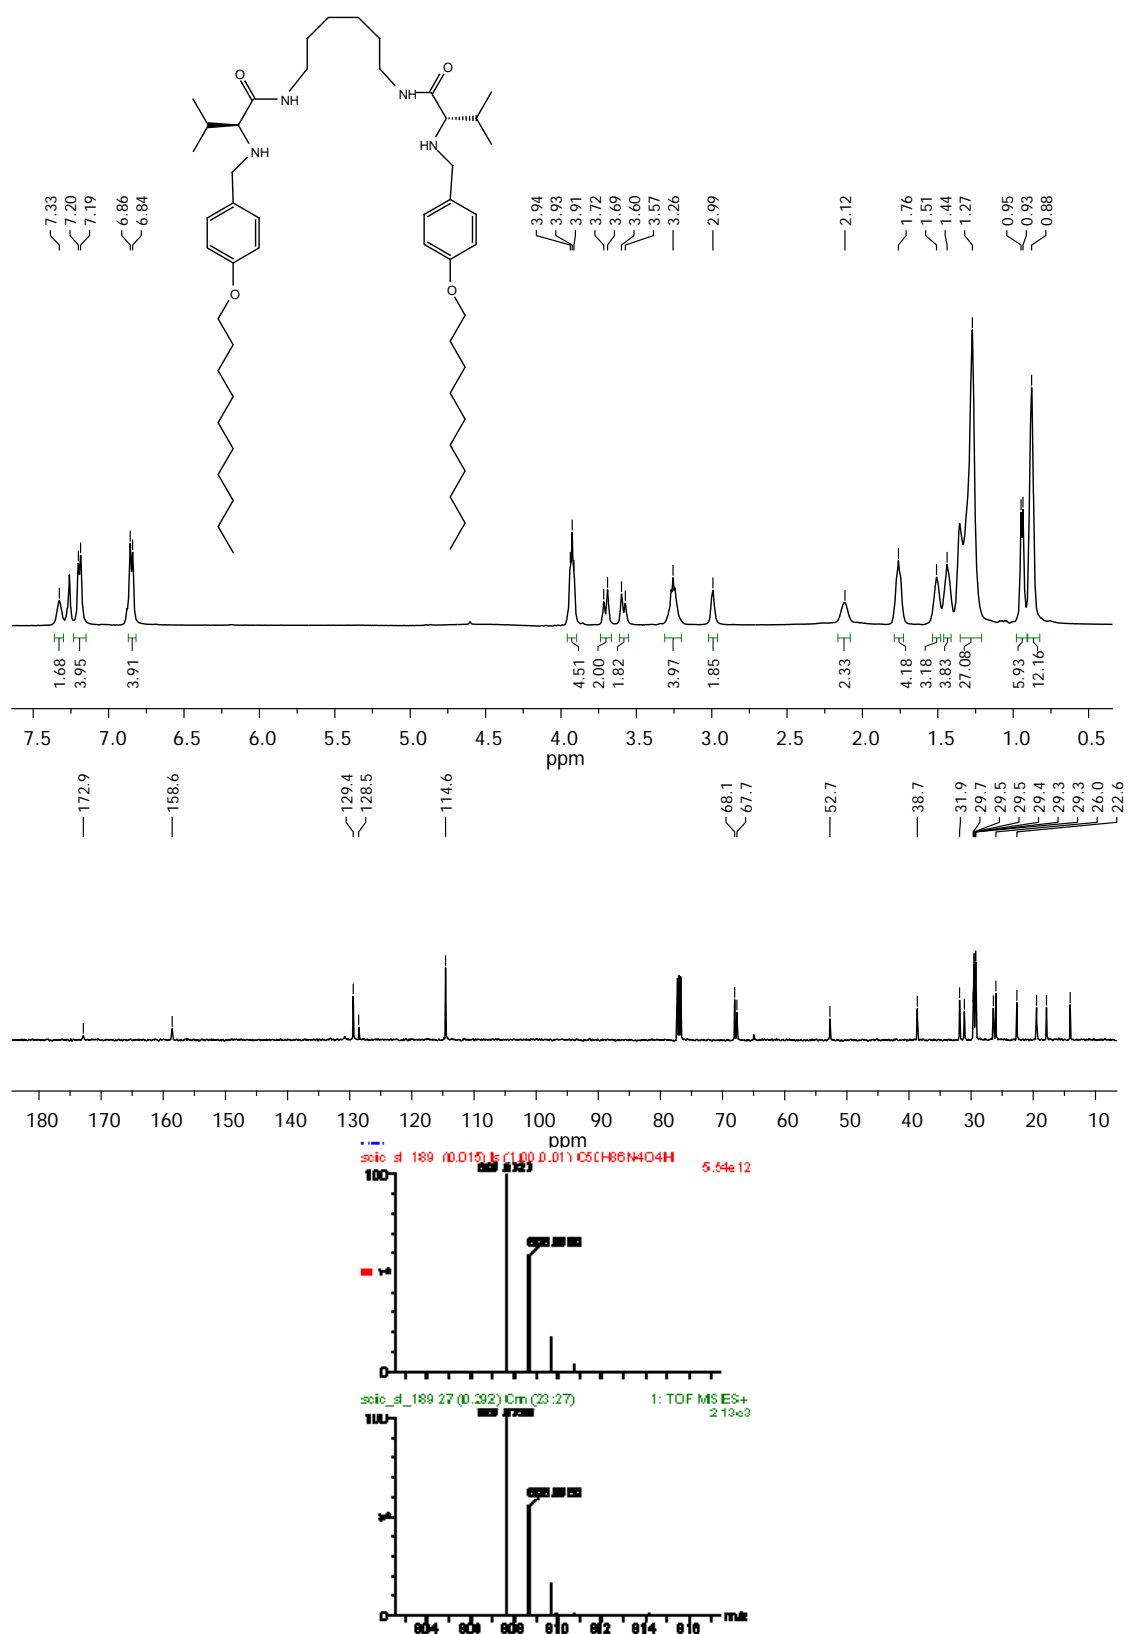



A6Val\_a10benz\_m (5)<sup>b</sup>

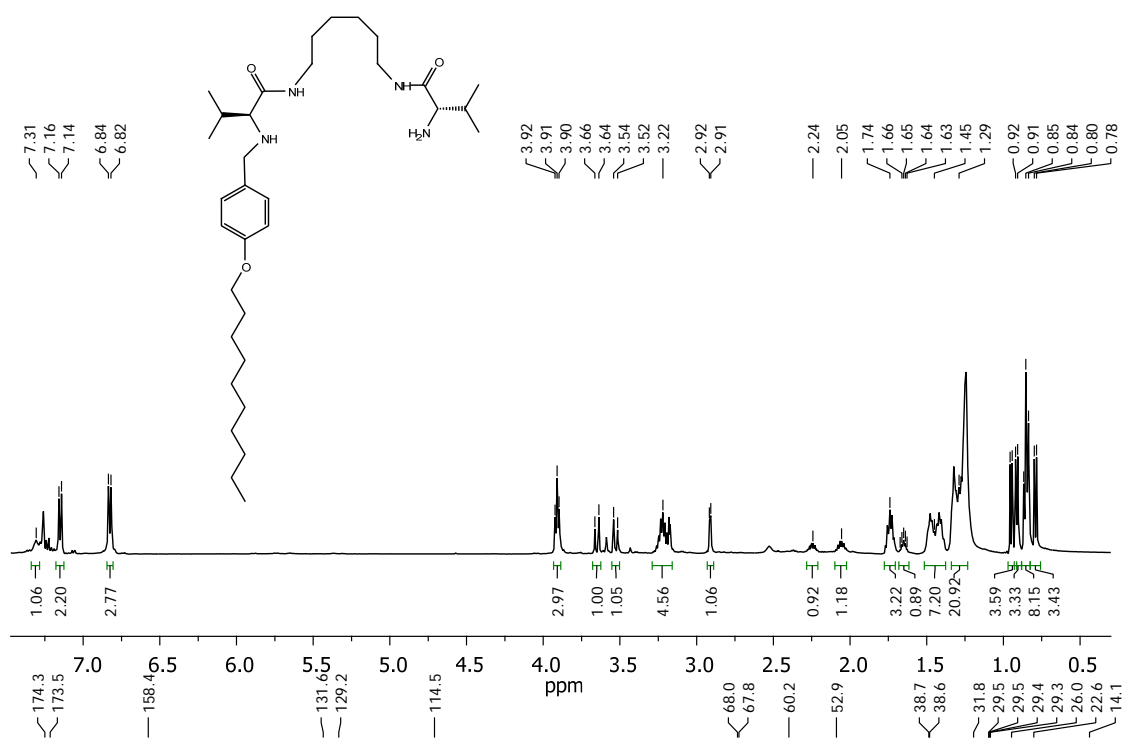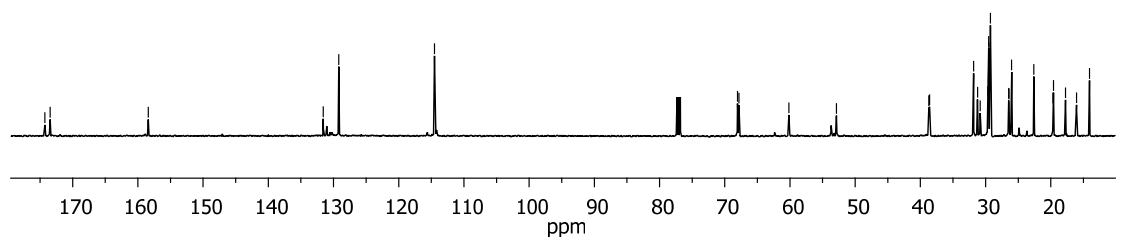

scic\_sl\_203 (0.016) Is (1.00,0.01) C<sub>33</sub>H<sub>60</sub>N<sub>4</sub>O<sub>3</sub>H 6.73e12

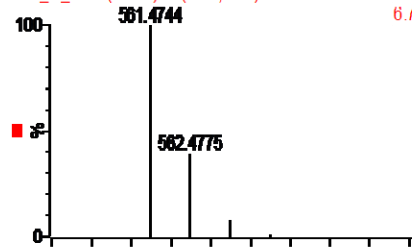

scic\_sl\_203 128 (1.380) Cm (109:128) 1: TOF MS ES+ 4.51e3

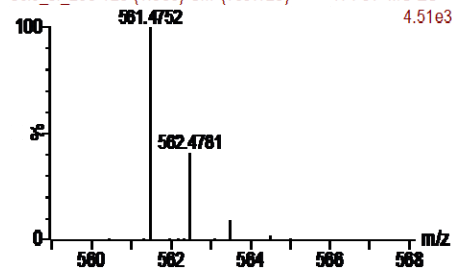

A2Phe\_a10obenz (6)

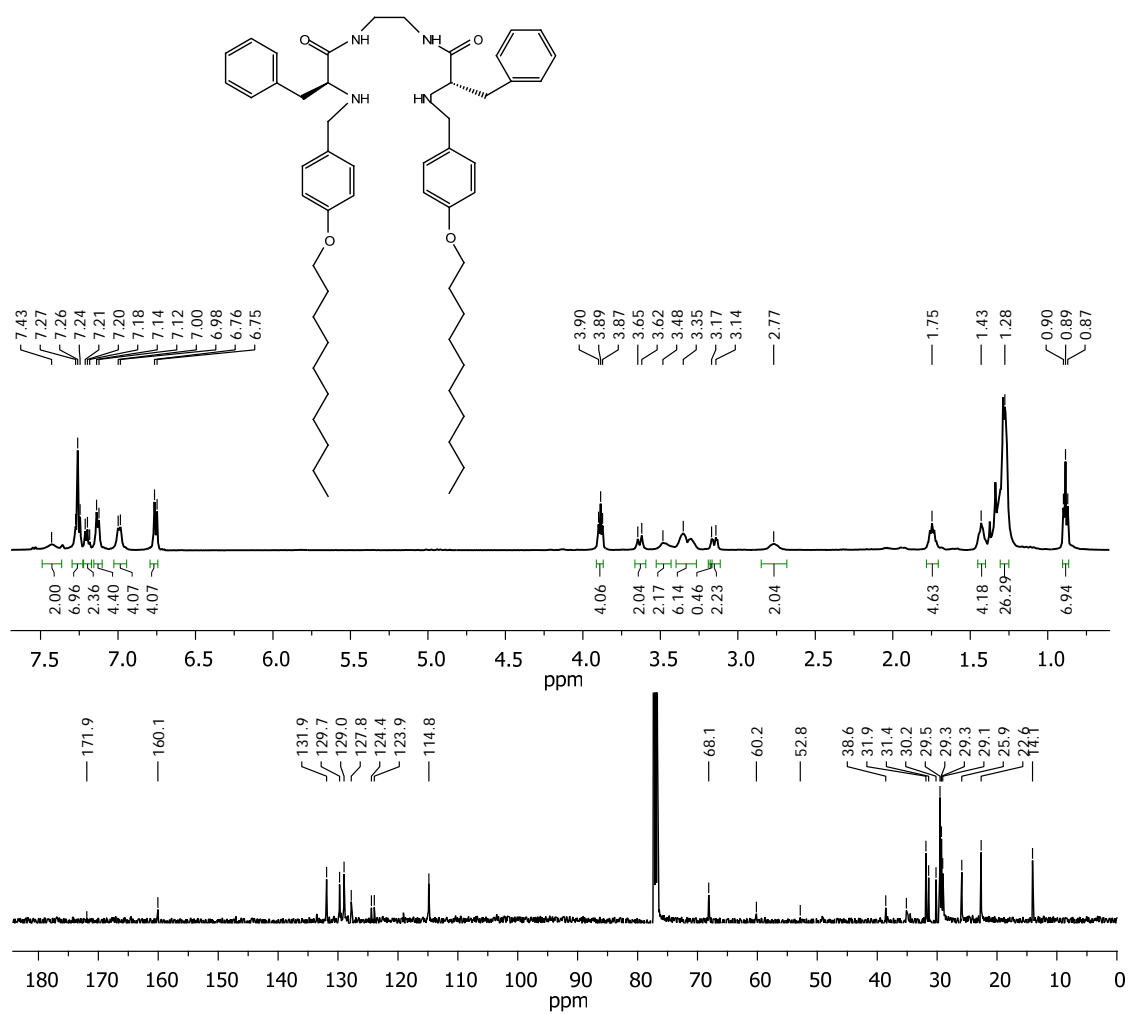

scic\_sl\_160 (0.016) Is (1.00,0.01) C54H78N4O4H 5.31e12

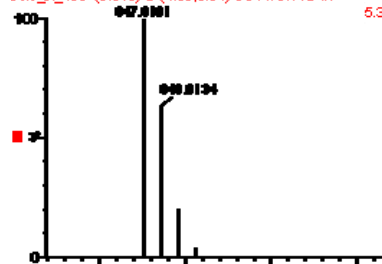

scic\_sl\_160 60 (0.647) Cm (58.61) 1: TOF MS ES+ 3.52e3

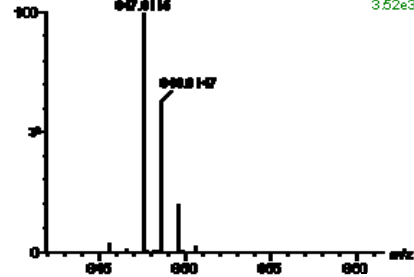

A2Phe\_a10benz\_m (6)<sup>b</sup>

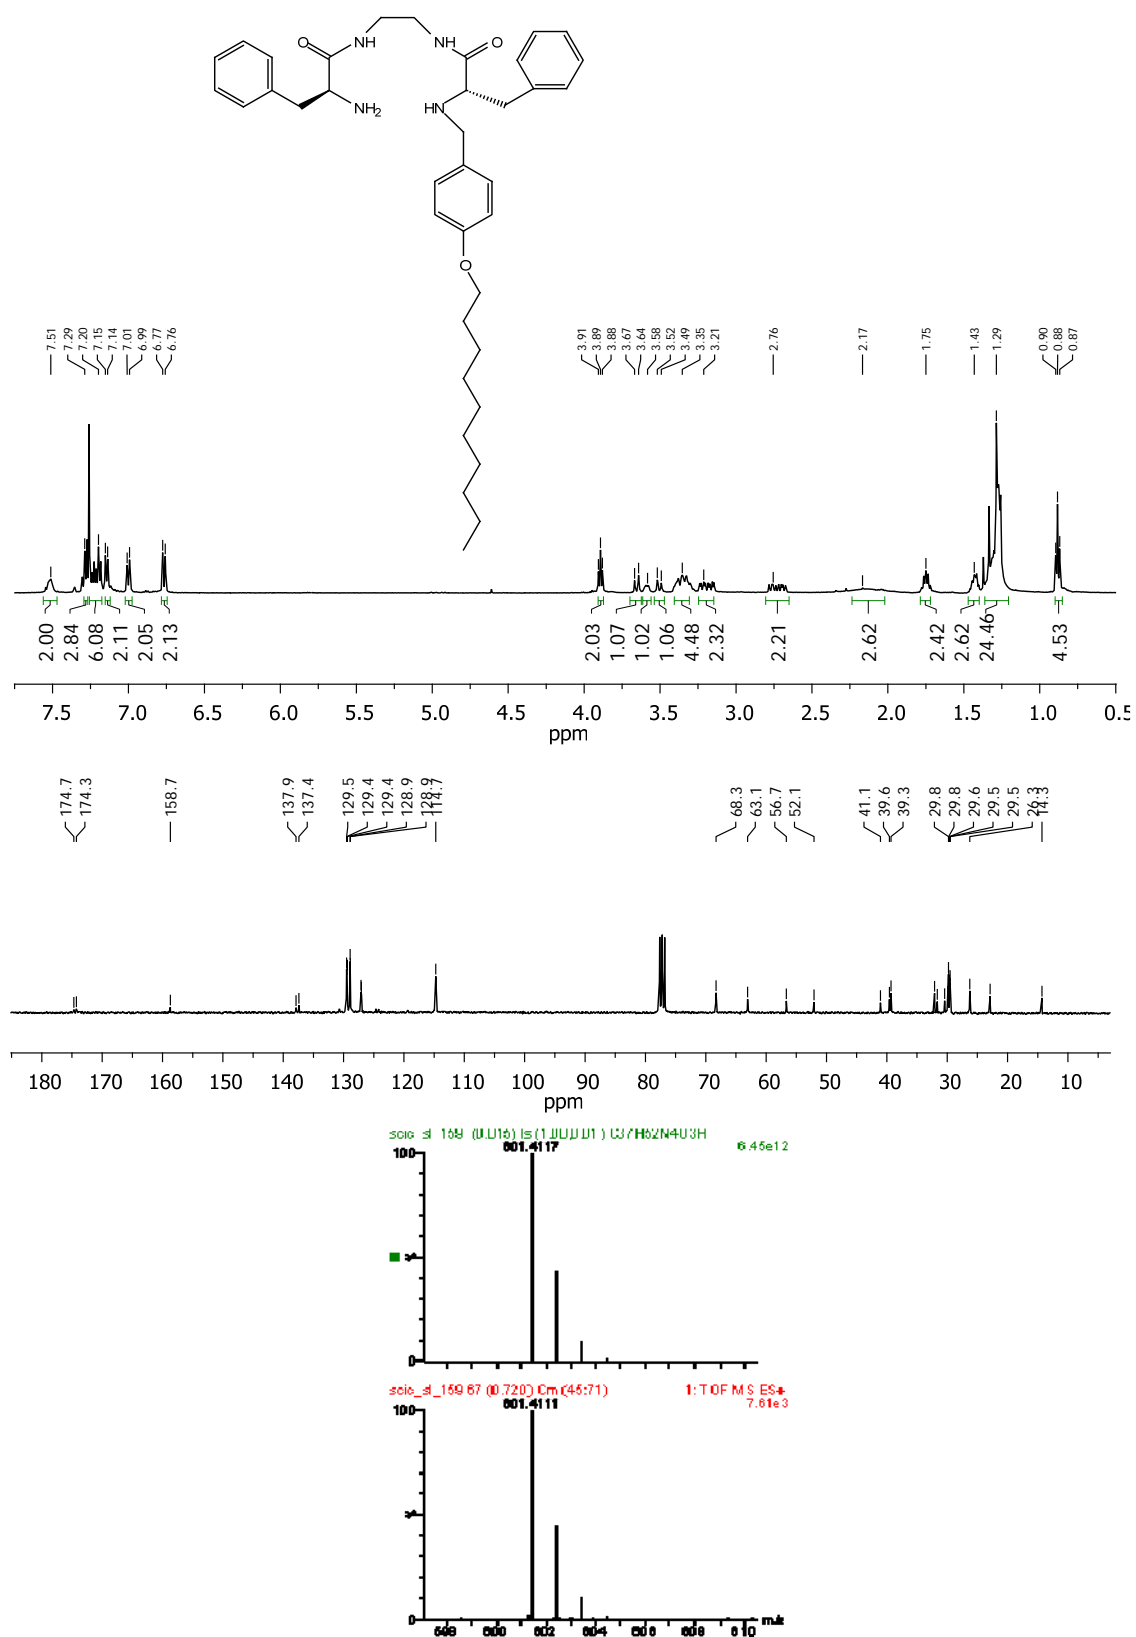

### A3Phe\_a10benz (7)

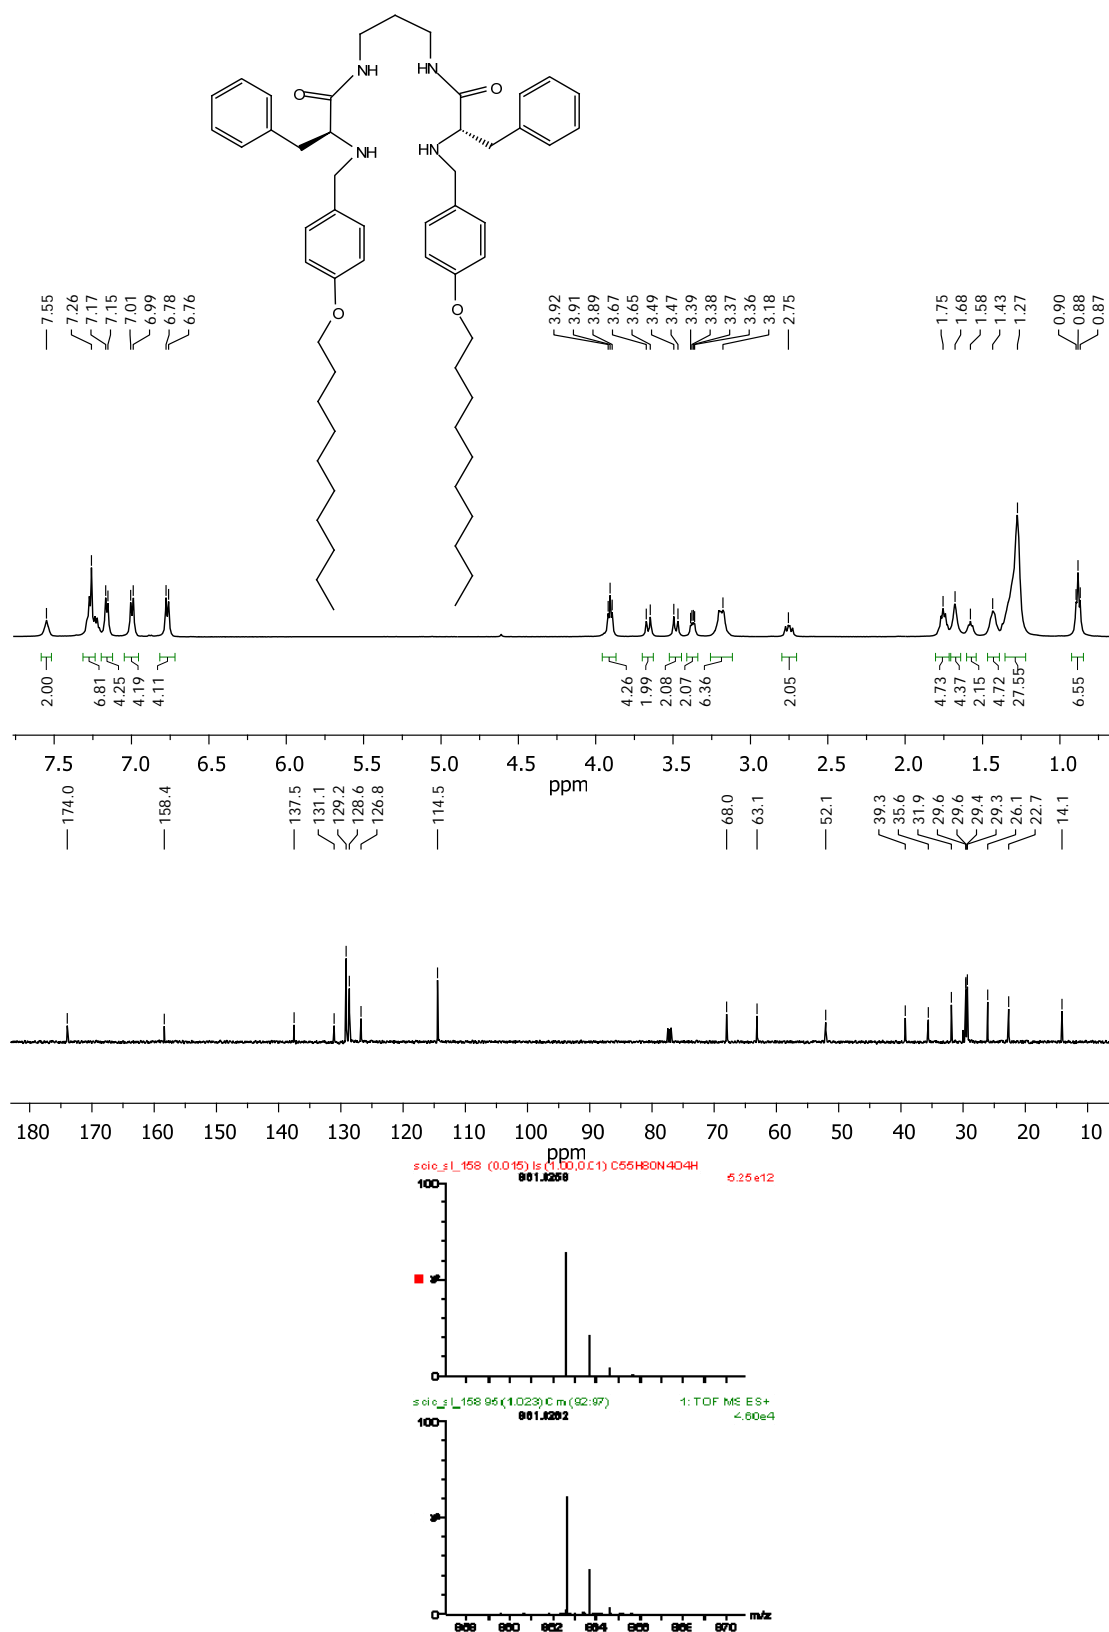

A3Phe\_a10benz\_m (7)<sup>b</sup>

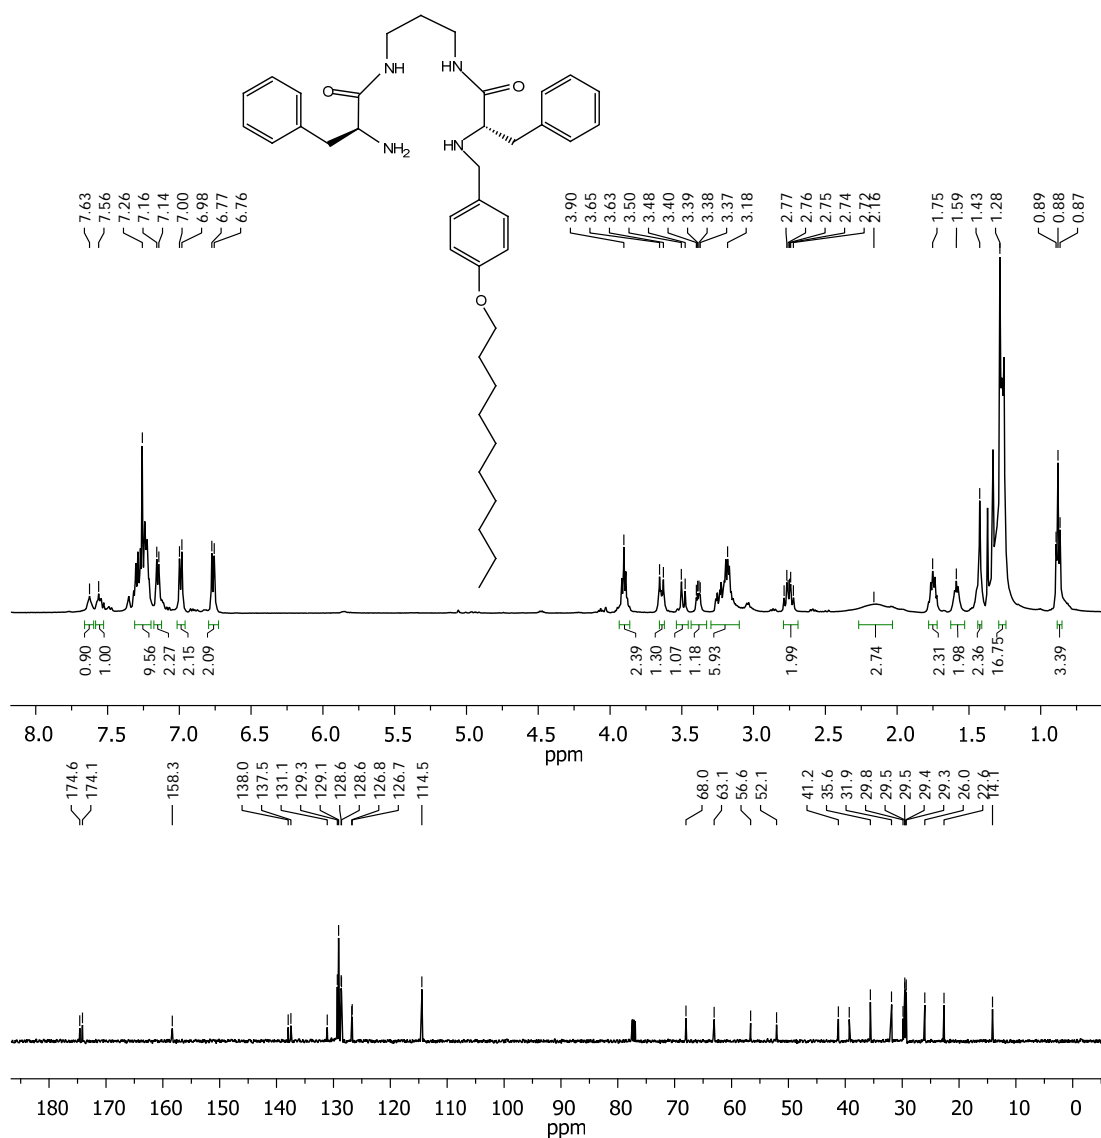

s vic sl 157 (0.015) Is (1.00,0.01) C38H54N4O3H 6.37 e12

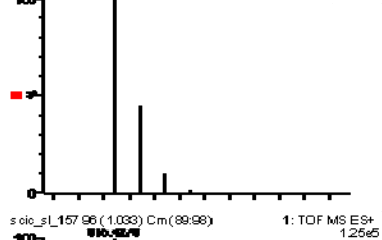

s vic\_sl\_157\_96 (1.033) Cm (88:98) 1: TOF MS ES+ 1.25e5

A4Phe\_a10benz (8)

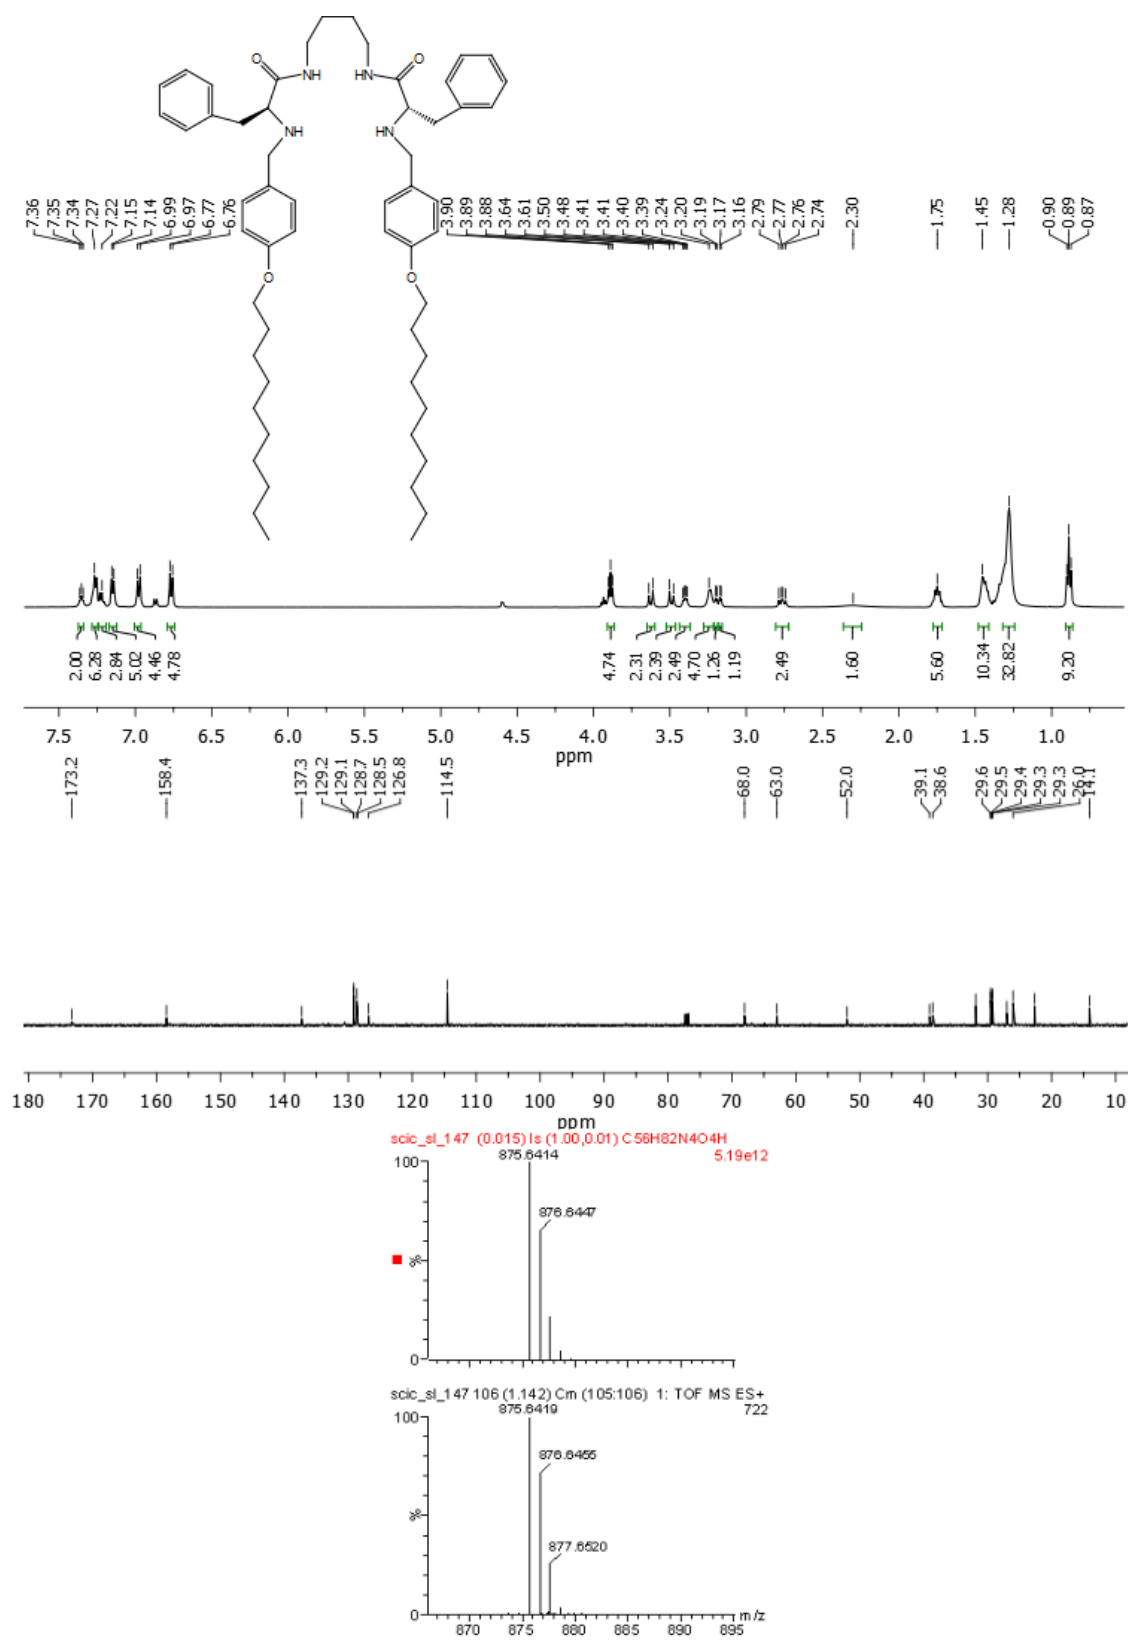

A4Phe\_a10benz\_m (8)<sup>b</sup>

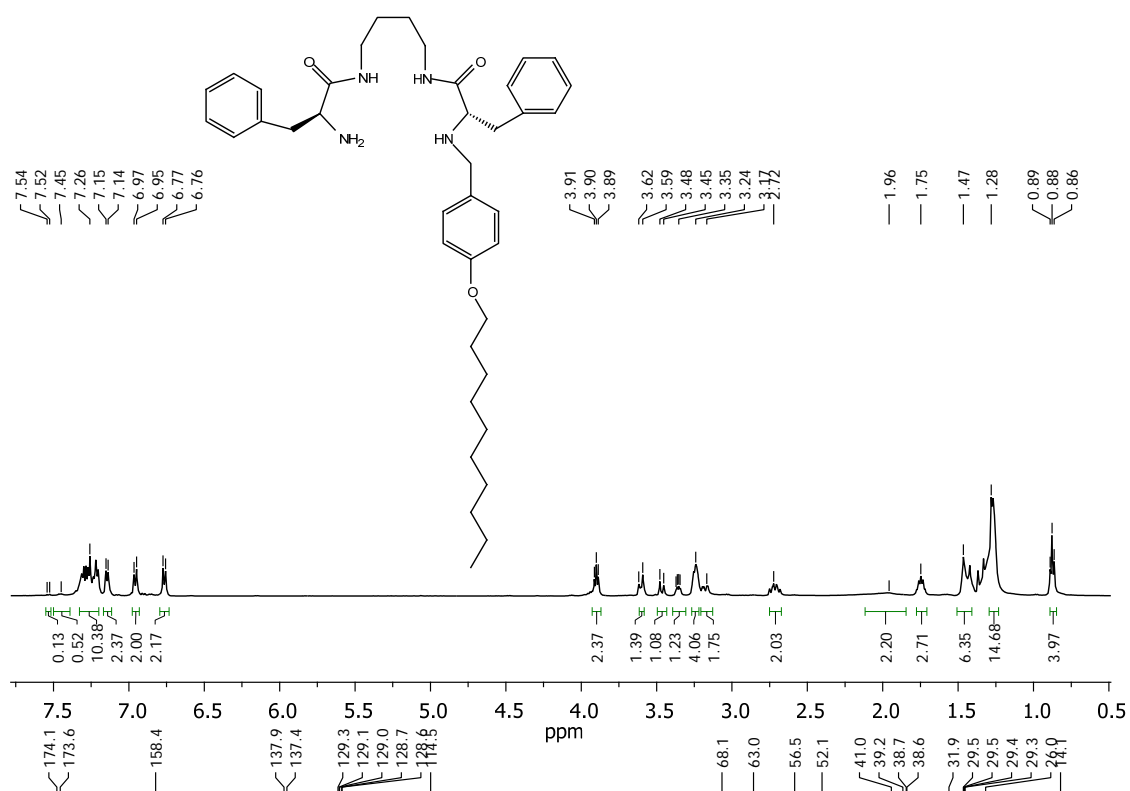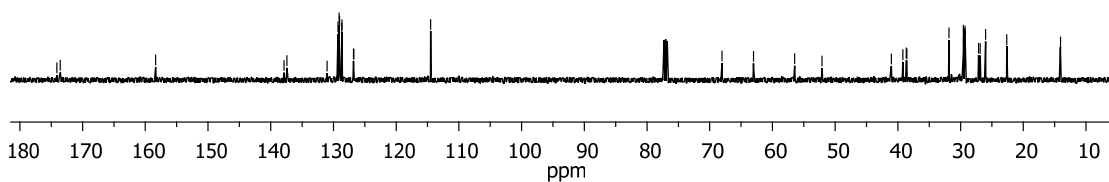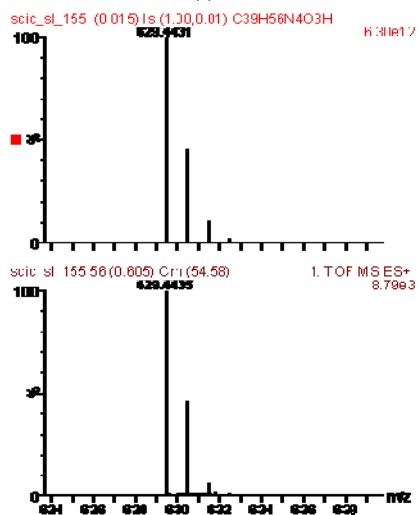

A2Val\_a8 (9)

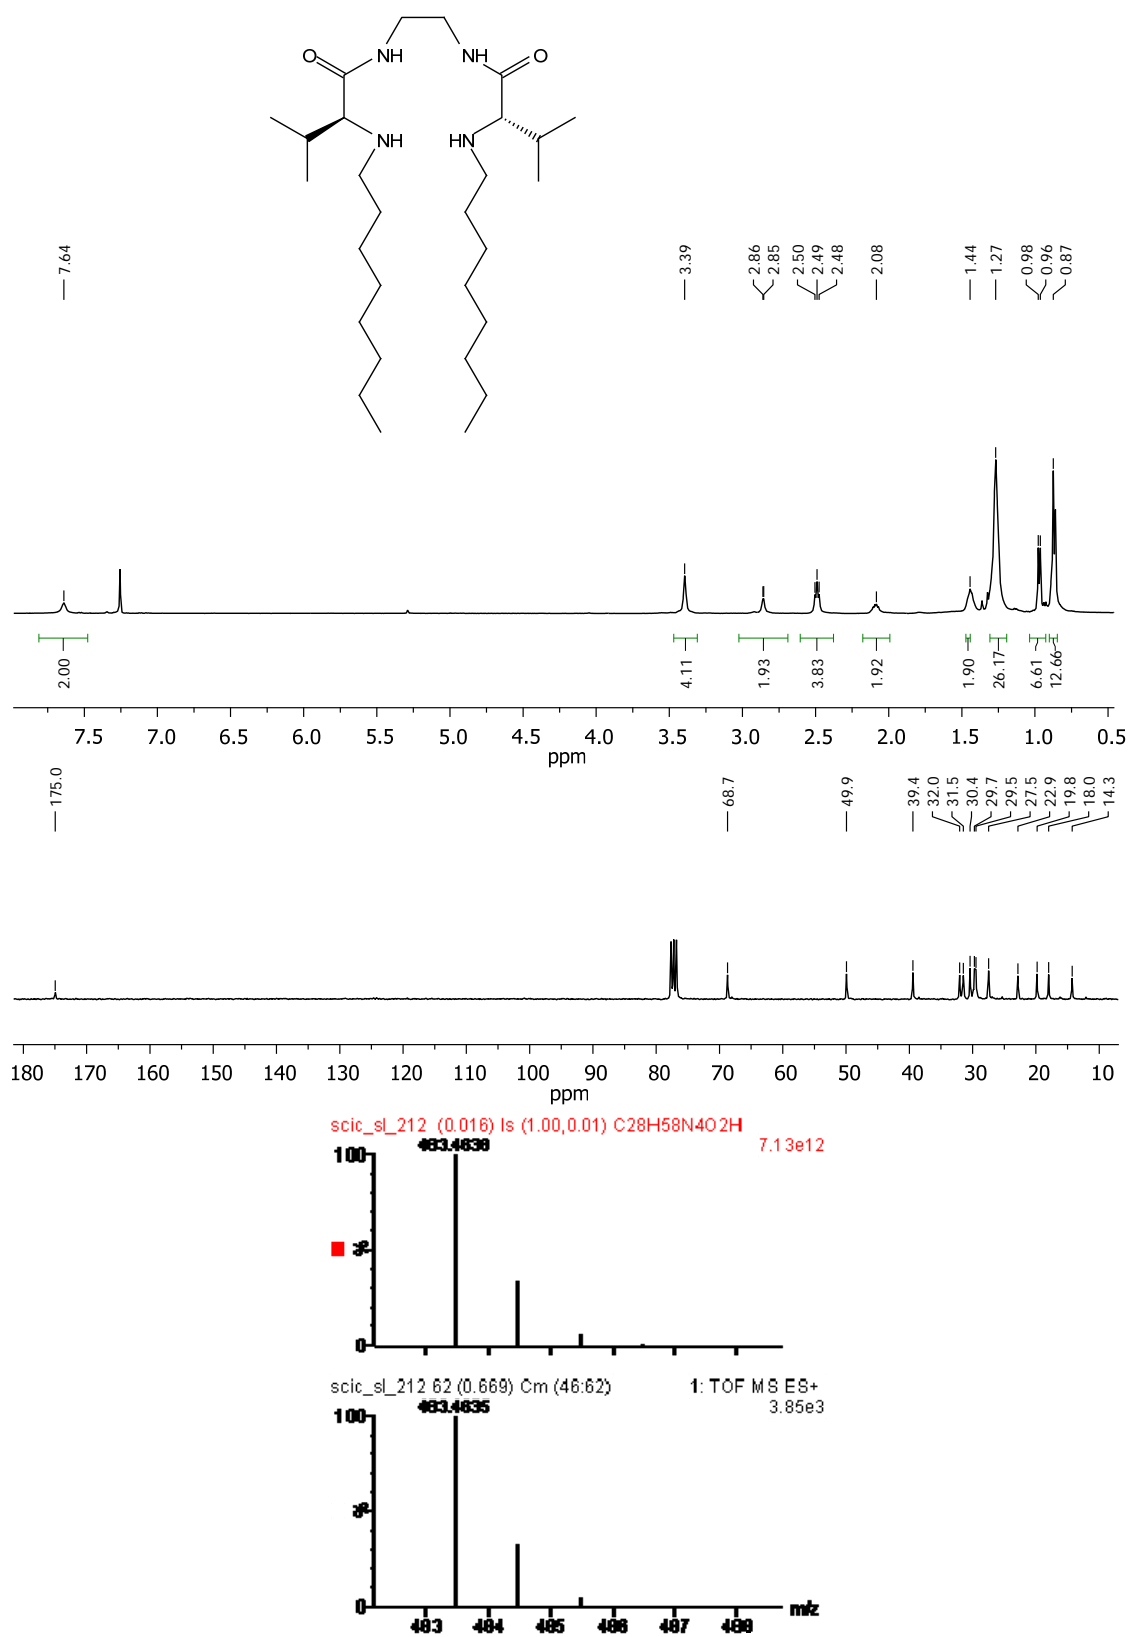



A3Val\_a8 (10)

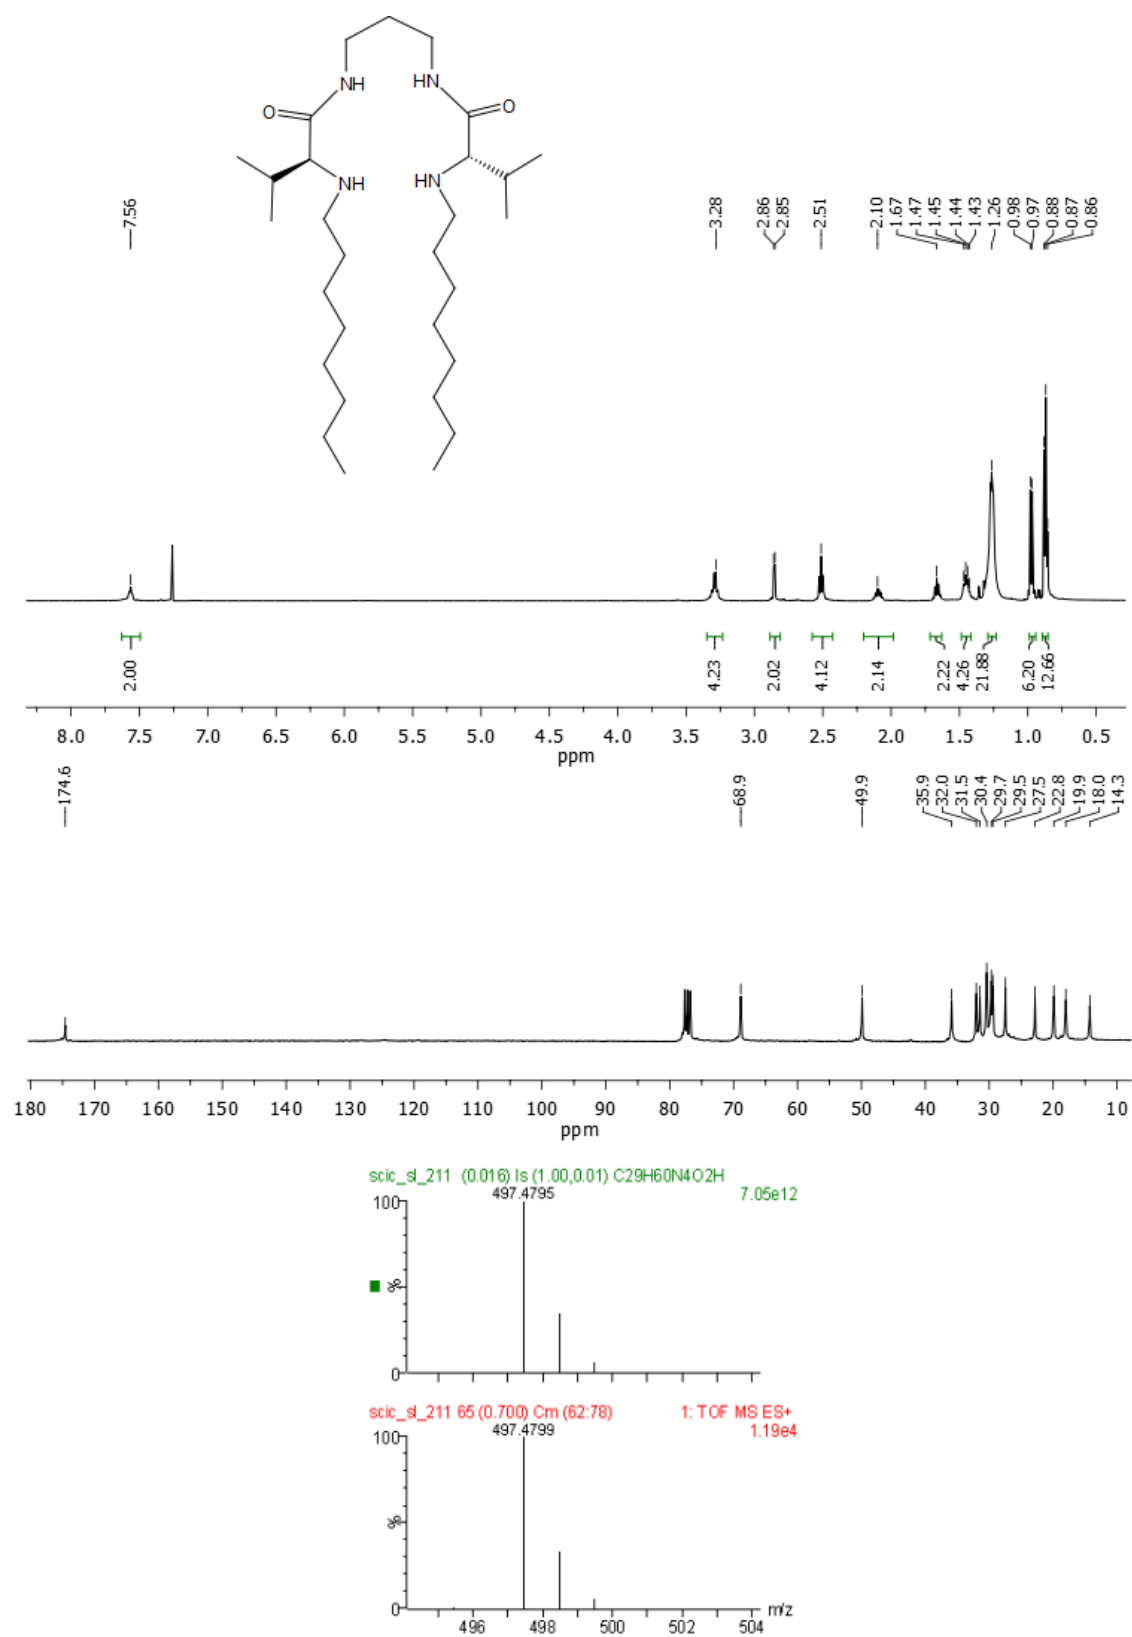

A4Val\_a8 (11)

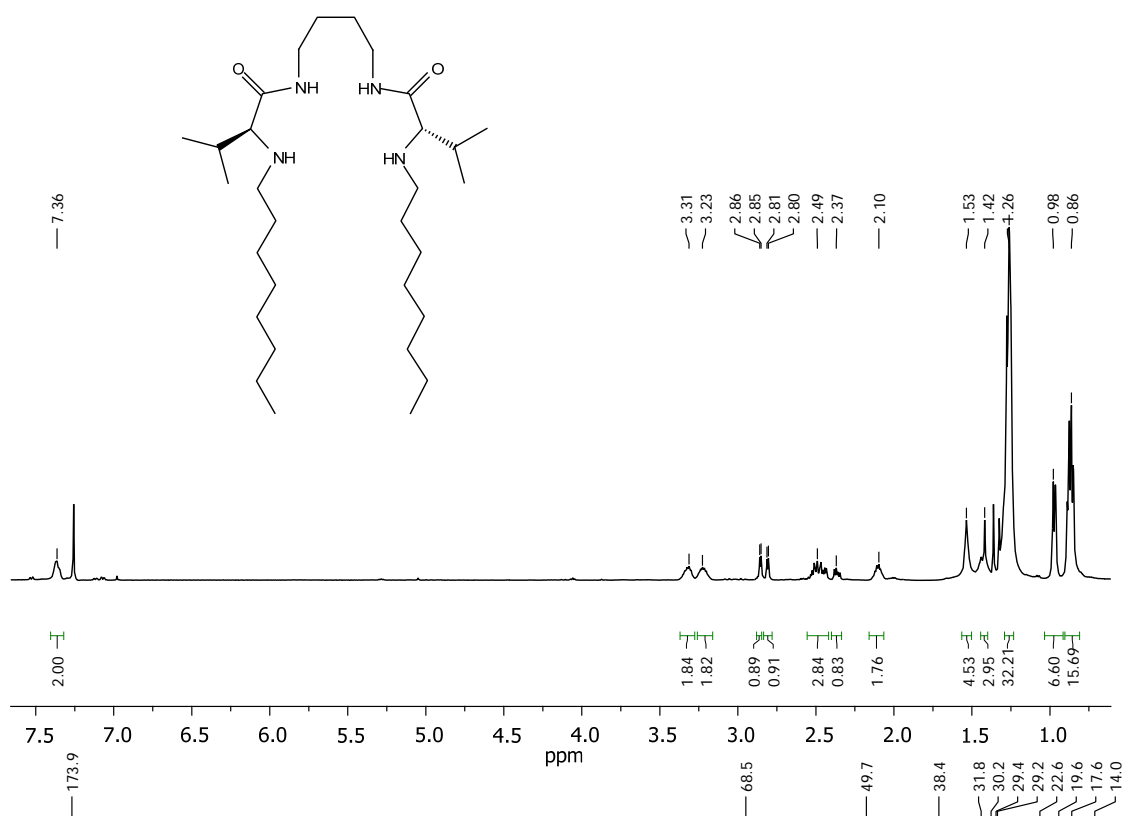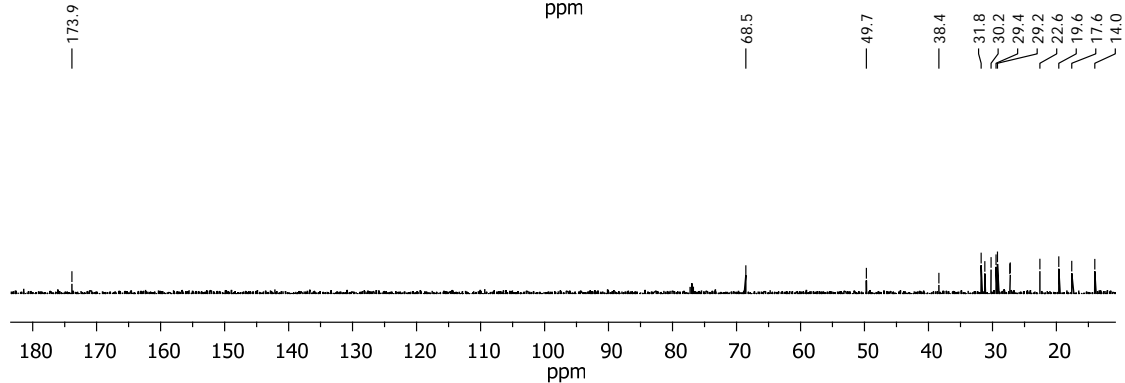

scic\_sl\_210 (0.016) Is (1.00,0.01) C<sub>30</sub>H<sub>62</sub>N<sub>4</sub>O<sub>2</sub>H 6.97e12

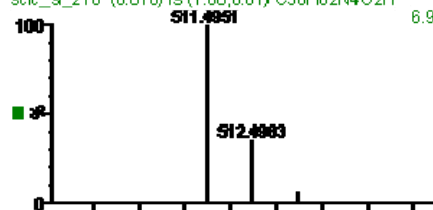

scic\_sl\_210 119 (1.281) Cm (103:120) 1: TOF MS ES+ 6.80e3

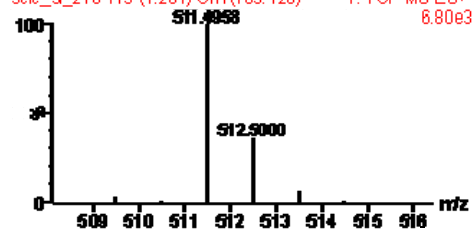

### A4Ala\_a10obenz (12)

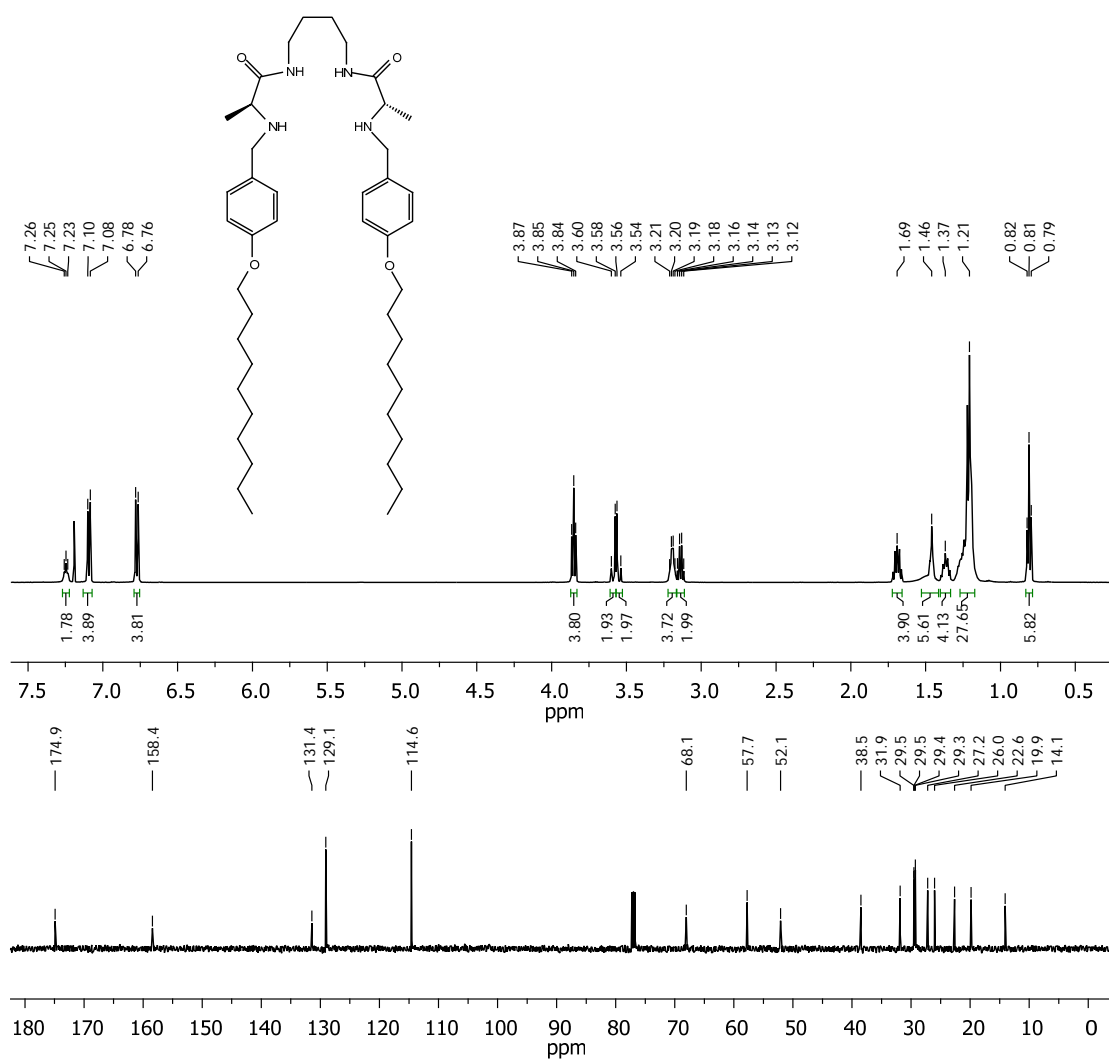

scic\_sl\_216 (0.016) Is (1.00,0.01) C<sub>44</sub>H<sub>74</sub>N<sub>4</sub>O<sub>4</sub>H 5.93e12

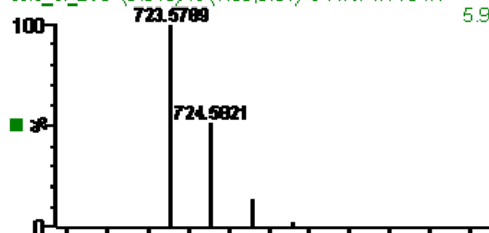

scic\_sl\_216 84 (0.904) C m (80:98) 1: TOF MS ES+ 5.85e3

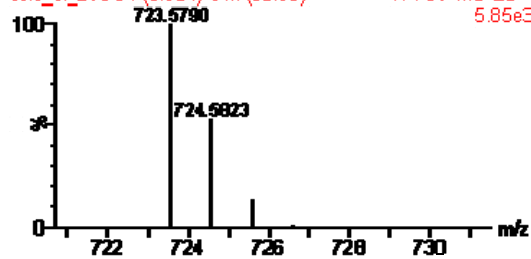

A4Ala\_a10benz\_m (12)<sup>b</sup>

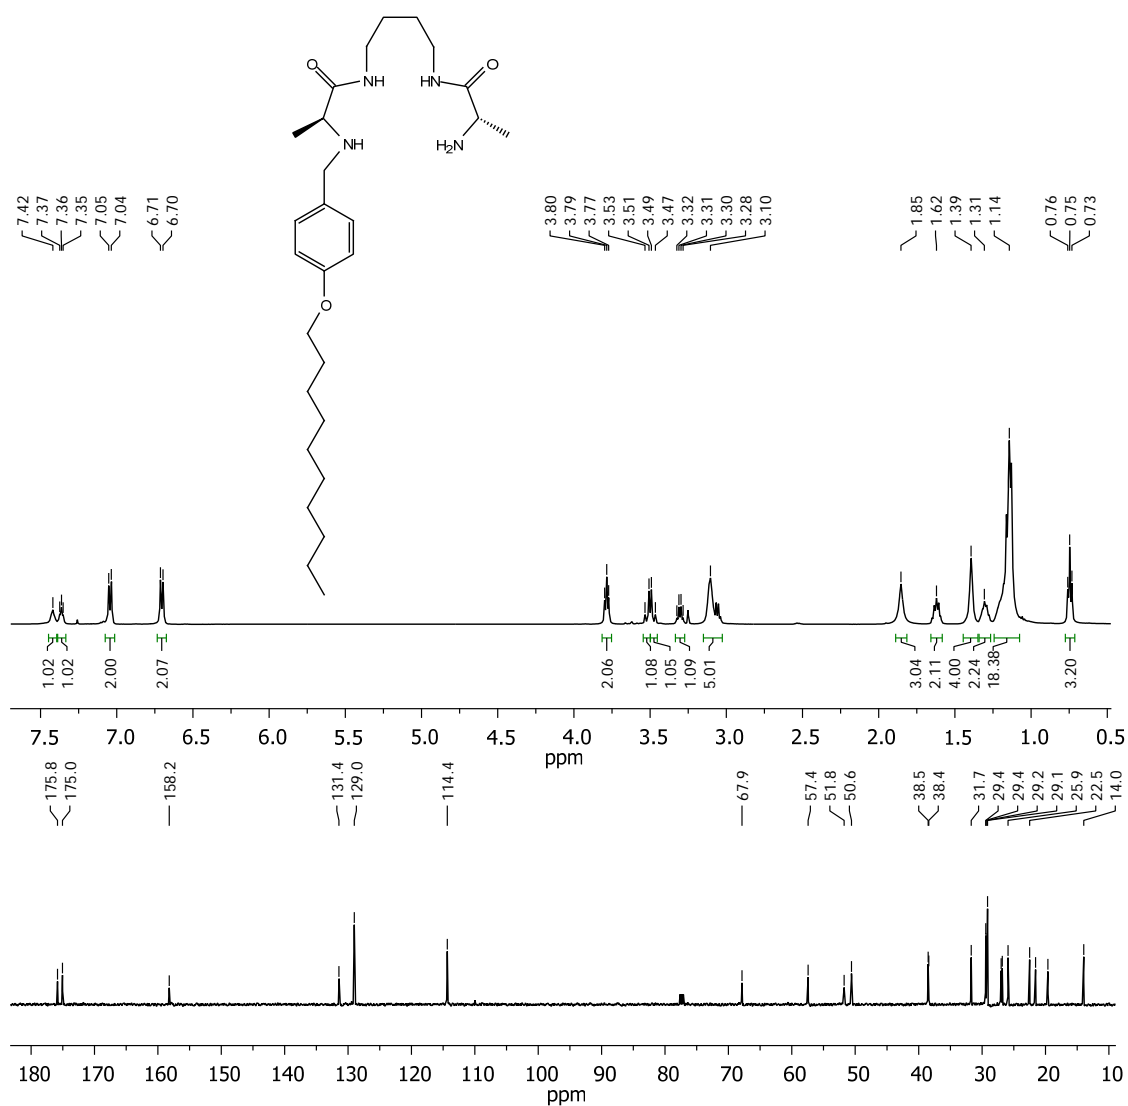

scic\_sl\_217 (0.016) Is (1.00,0.01) C27H48N4O3H 7.20e12

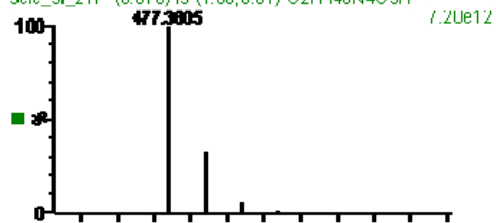

scic\_sl\_217 69 (0.747) Cm (69:79) 1: TOF MS ES+ 4.50e3

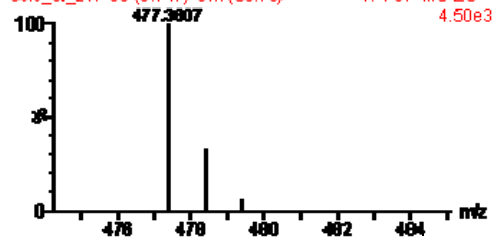

A4Leu\_a10benz (13)

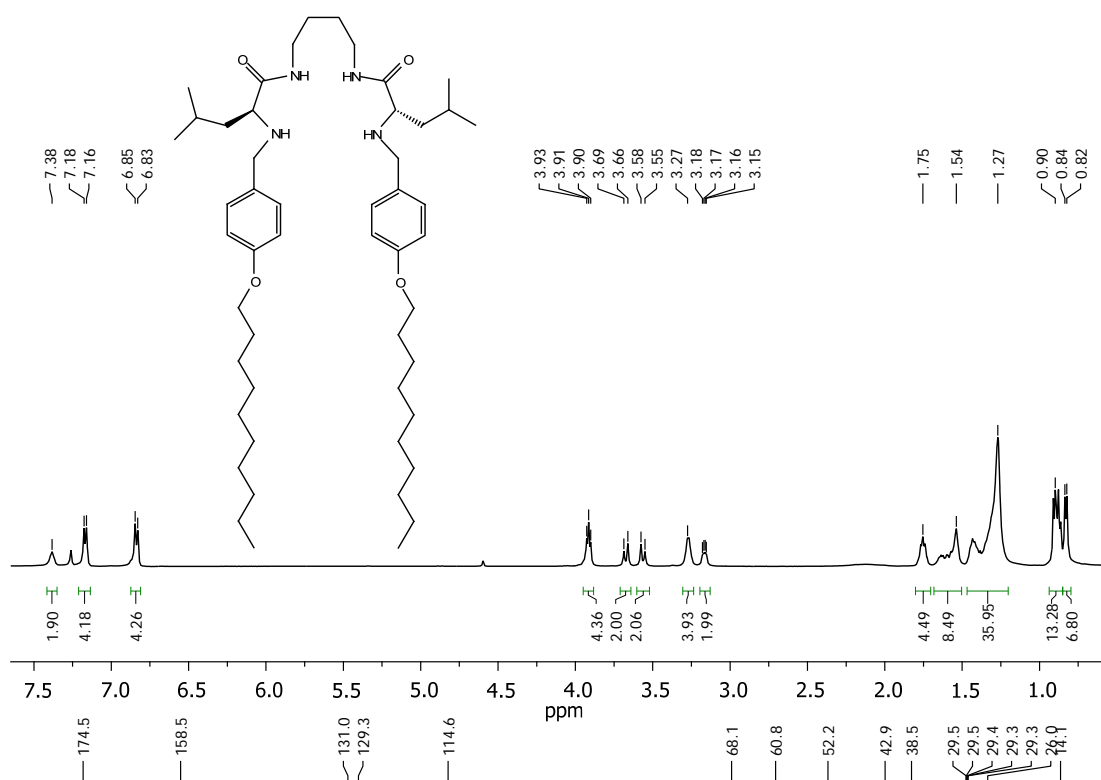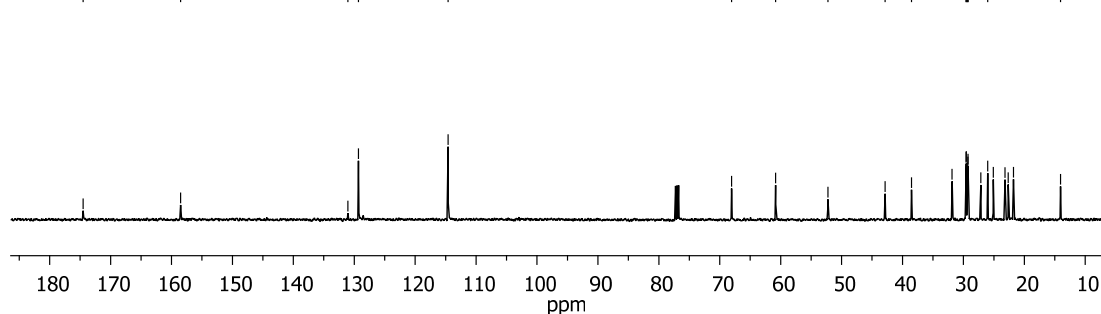

scic\_1\_190 (0.015) (1.000.01) C50H80N4O4H 5.54e12

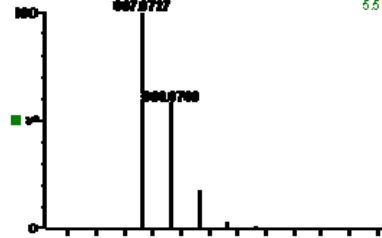

scic\_1\_190 (0.805) Cm (48:57) 1: TOF MS ES+ 6.34e3

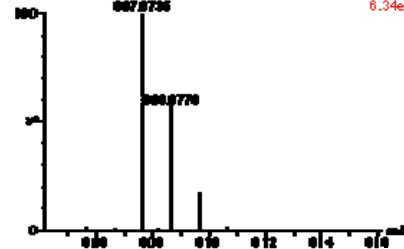

A4Leu\_a10obenz\_m (13)<sup>b</sup>

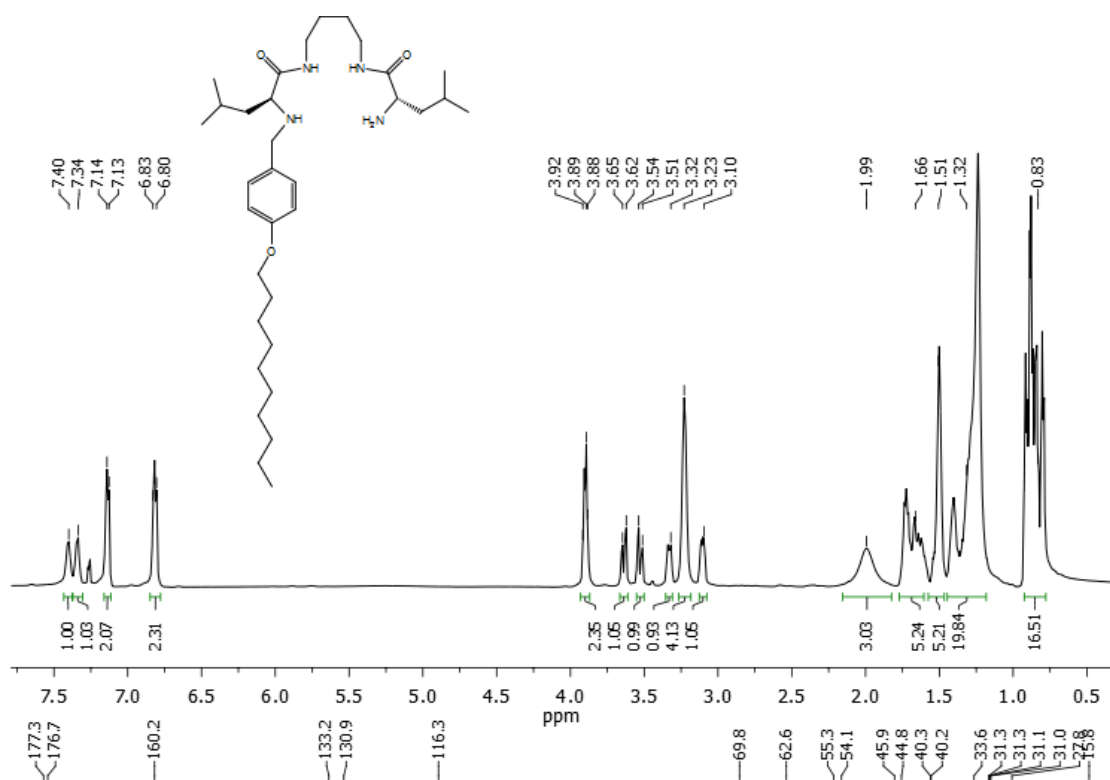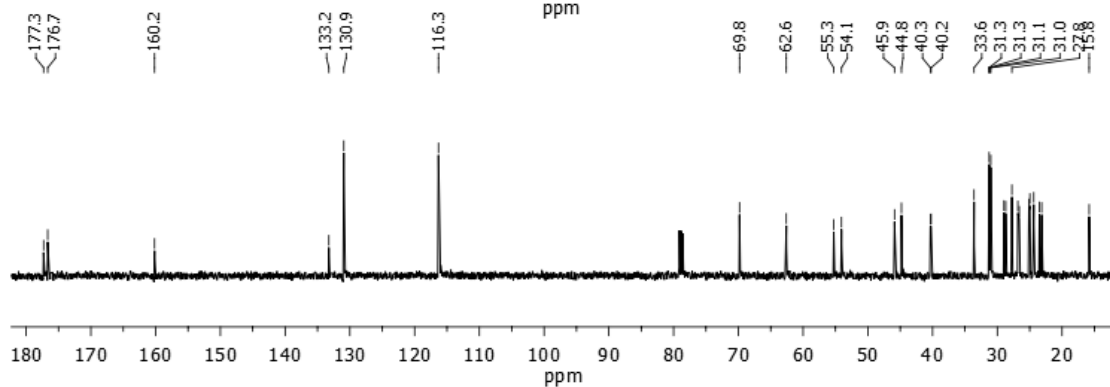

scic\_sl\_215 (0.016) Is (1.00,0.01) C<sub>33</sub>H<sub>60</sub>N<sub>4</sub>O<sub>3</sub>H 6.73e12

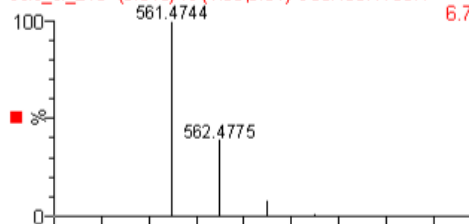

scic\_sl\_215 195 (2.101) Cm (188:195) 1: TOF MS ES+ 1.13e4

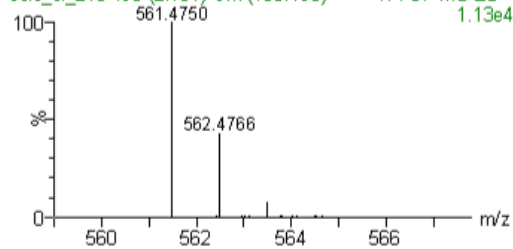

### A4Val\_alobenz (14)

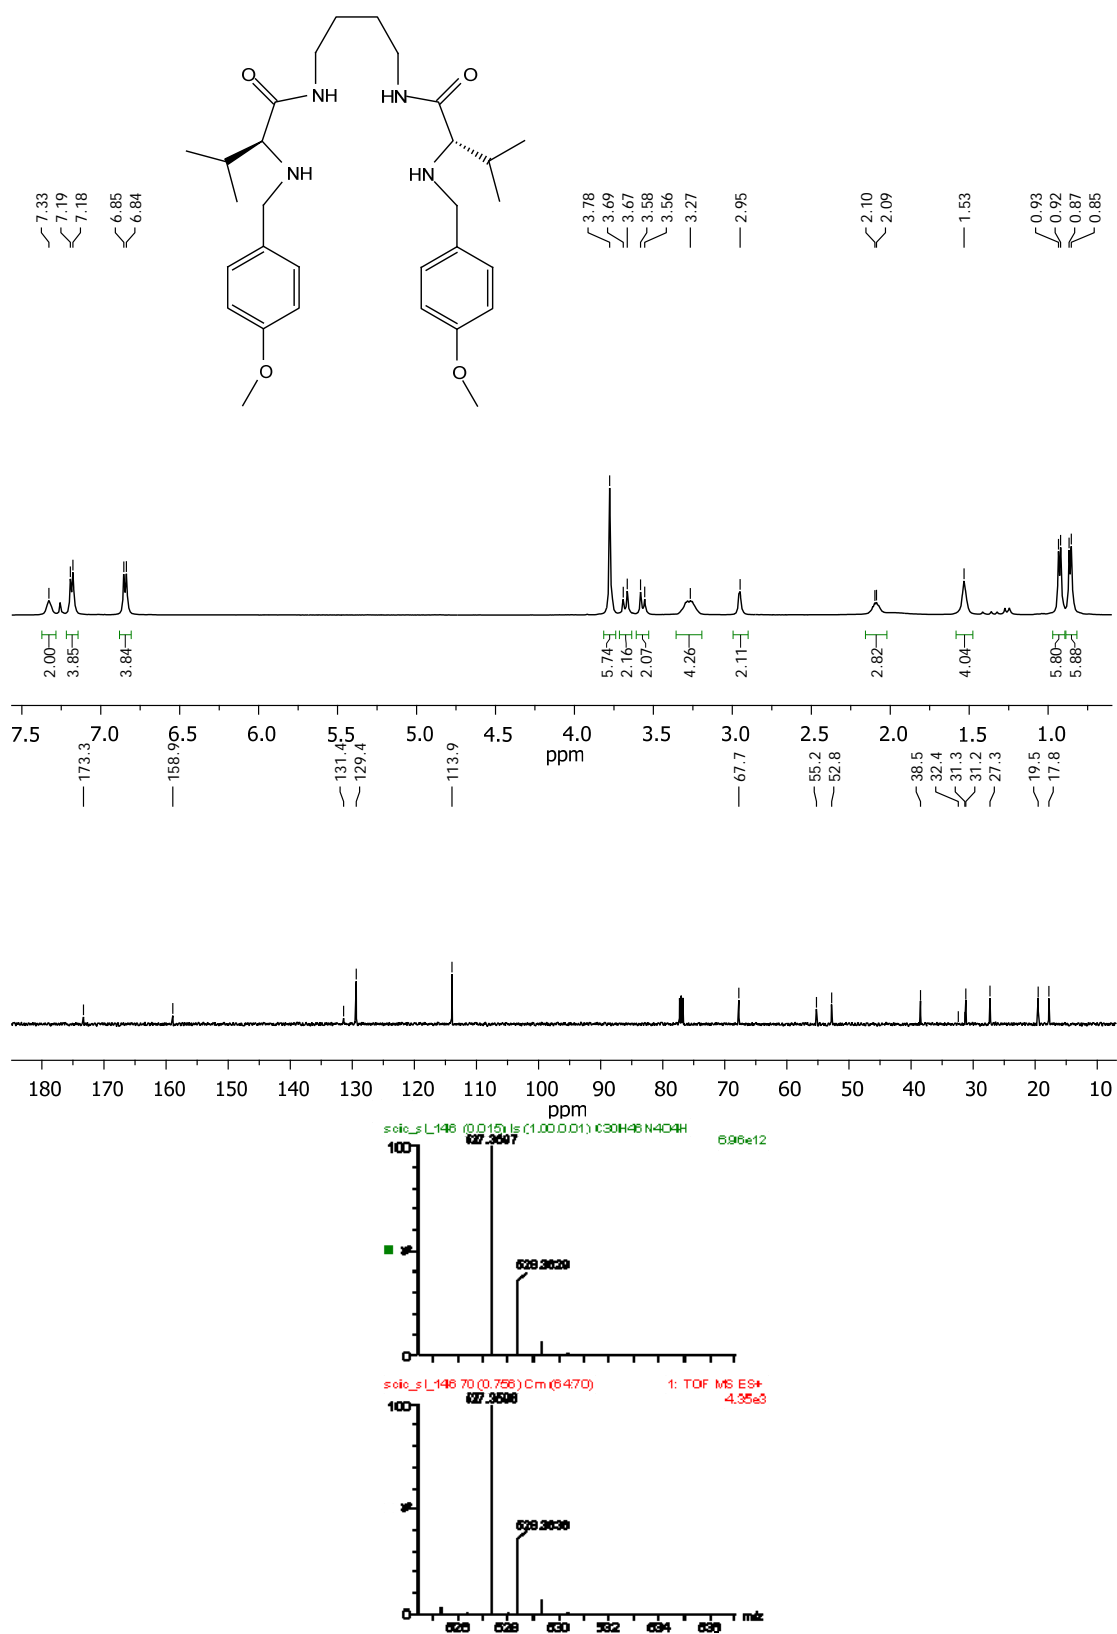

A4Val\_a4obenz (15)

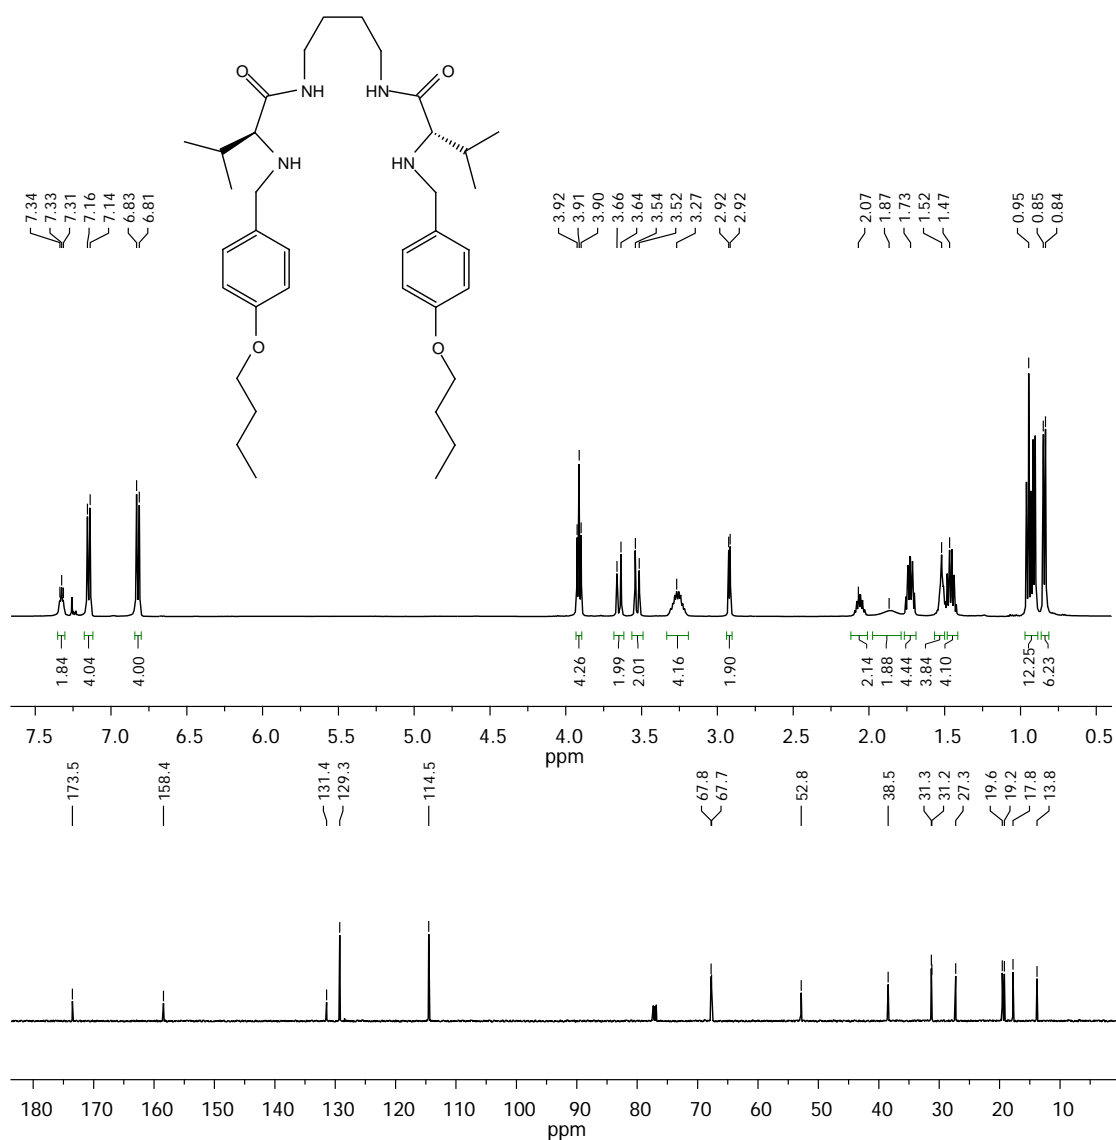

scic\_sl\_220 (0.016) Is (1.00,0.01) C<sub>36</sub>H<sub>58</sub>N<sub>4</sub>O<sub>4</sub>H 6.50e12

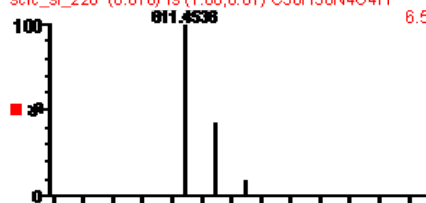

scic\_sl\_220 52 (0.565) Cm (49:63) 1: TOF MS ES+ 4.23e3

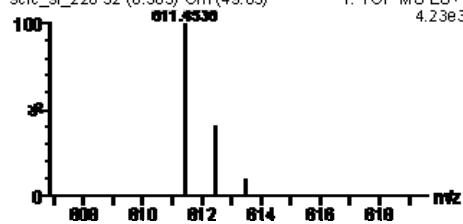



A4Val\_a4obenz\_m (15)<sup>b</sup>

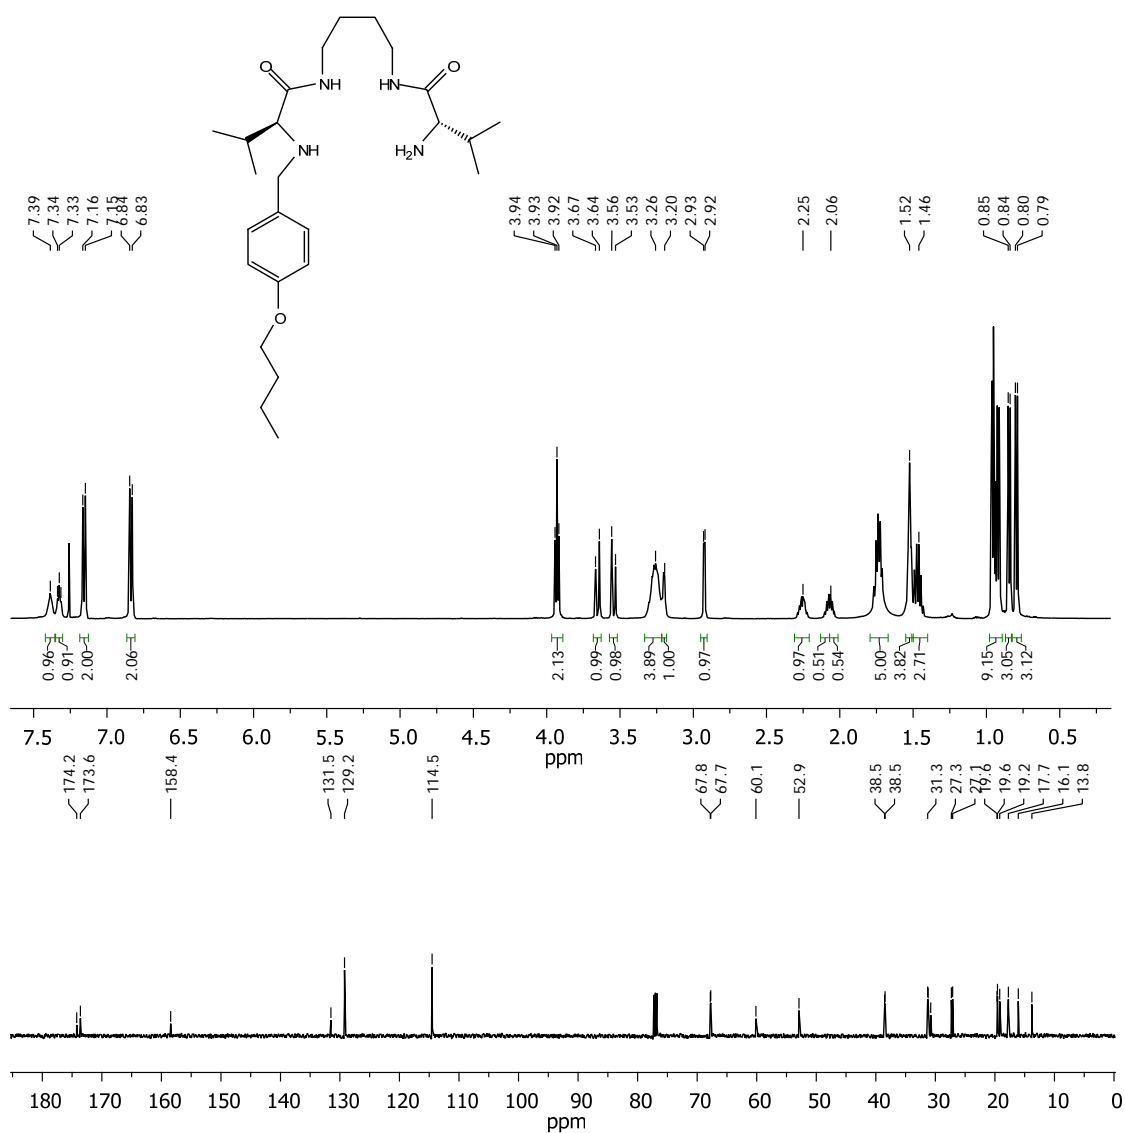

scic\_sl\_221 (0.015) Is (1.00,0.01) C<sub>25</sub>H<sub>44</sub>N<sub>4</sub>O<sub>3</sub>H 7.37e12

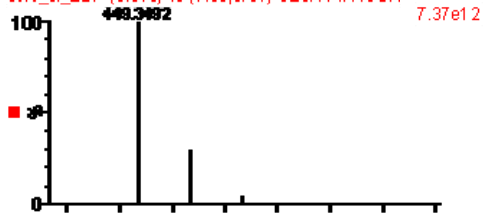

scic\_sl\_221 58 (0.626) Cm (54:65) 1: TOF MS ES+ 2.27e3

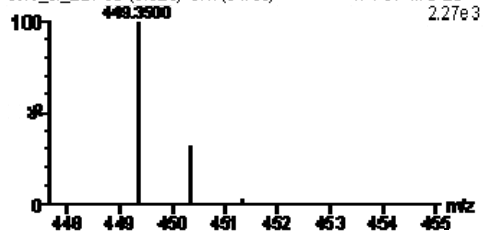

### SEM micrographs of compounds from chloroform solutions:

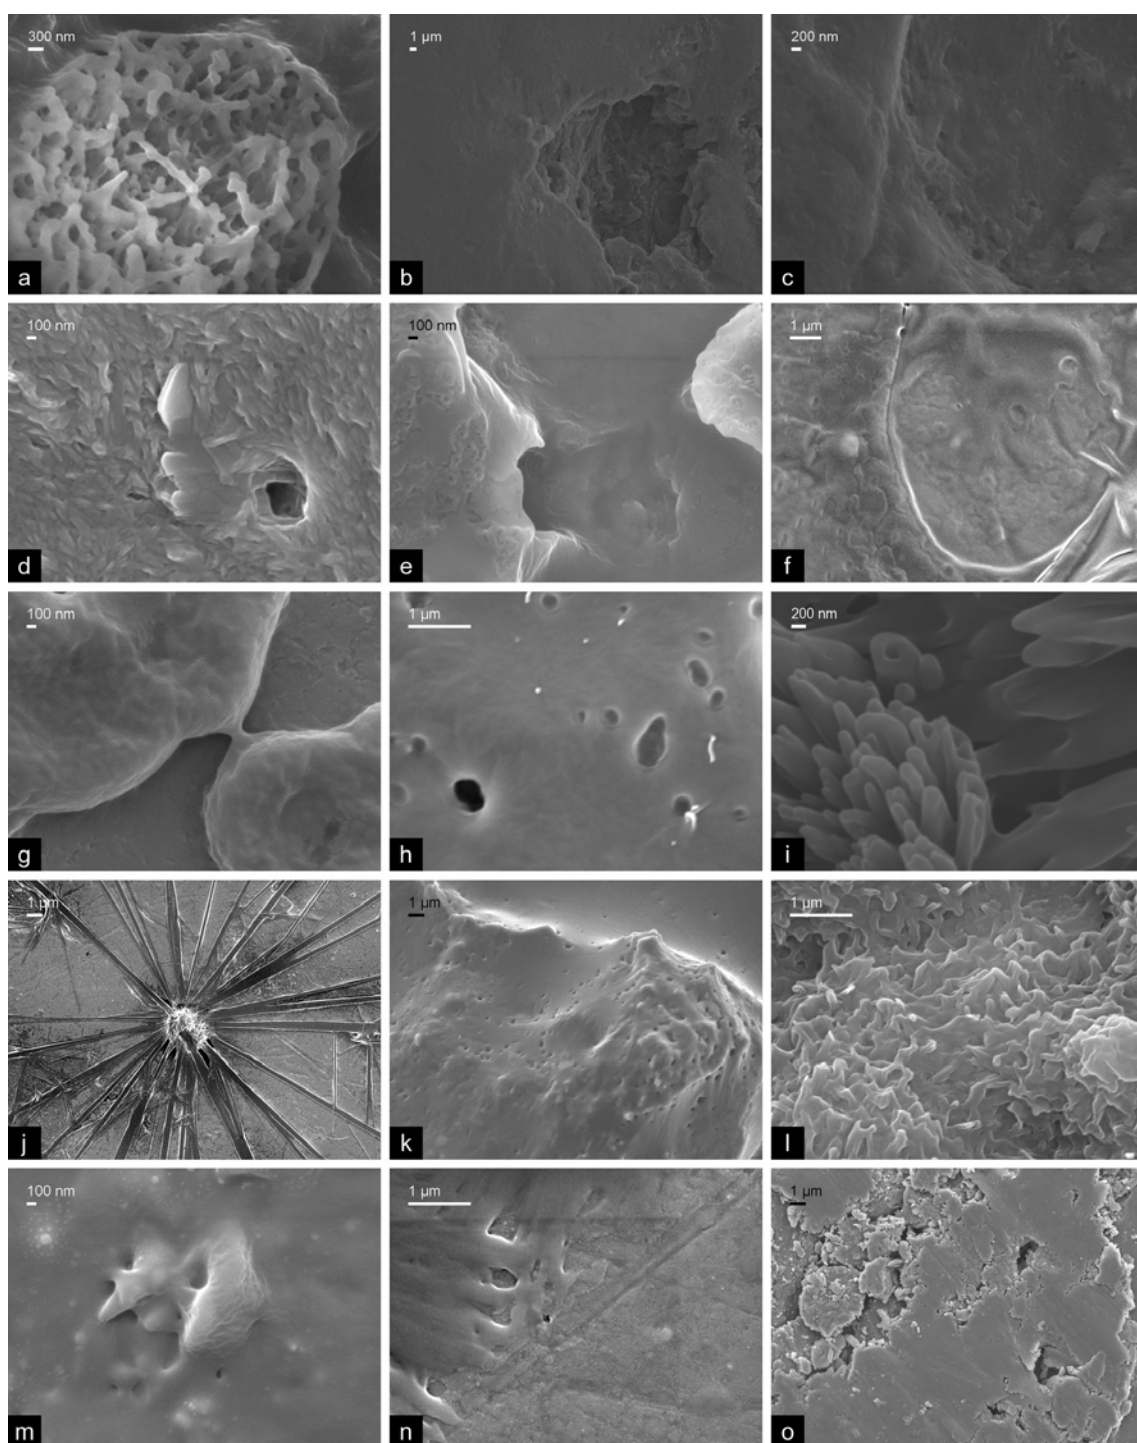

**Figure S1.** SEM micrographs of (a) A2Val\_a10obenz, (b) A3Val\_a10obenz, (c) A4Val\_a10obenz, (d) A5Val\_a10obenz, (e) A6Val\_a10obenz, (f) A2Phe\_a10obenz, (g) A3Phe\_a10obenz, (h) A4Phe\_a10obenz, (i) A2Val\_a8, (j) A3Val\_a8, (k) A4Val\_a8, (l) A4Ala\_a10obenz, (m) A4Leu\_a10obenz, (n) A4Val\_a1obenz and (o) A4Val\_a4obenz, grown from  $\text{CHCl}_3$  solutions. The corresponding scale bars are shown for every picture.

### SEM micrographs of compounds from MeOH solutions:

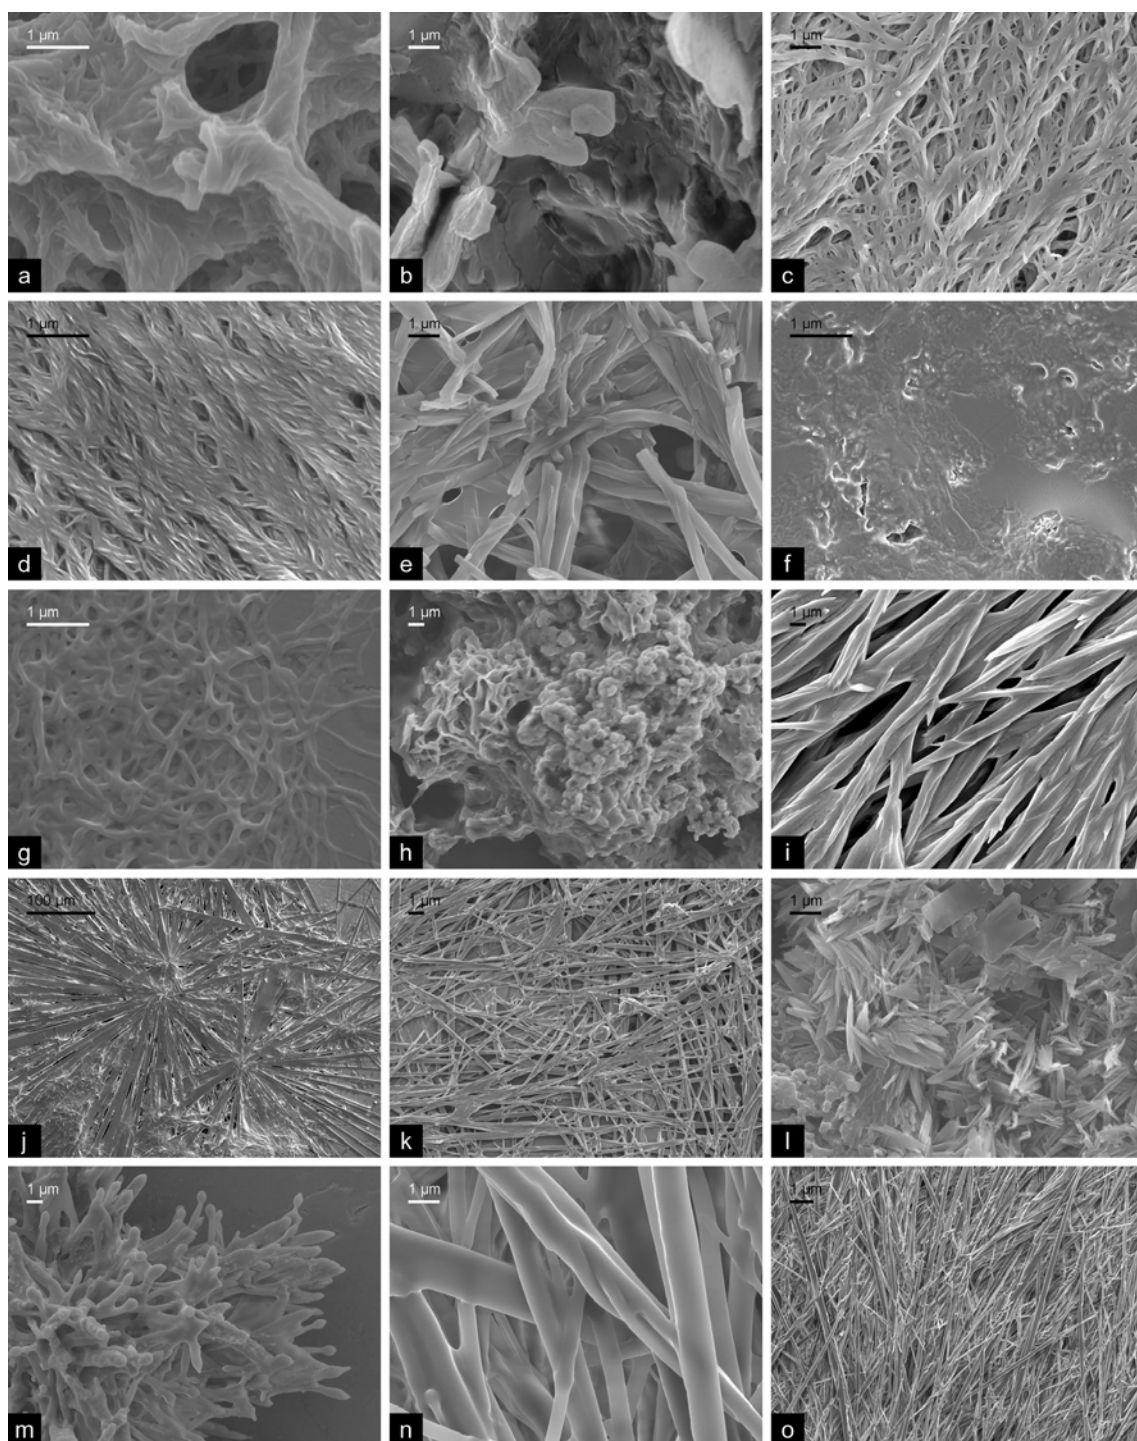

**Figure S2.** SEM micrographs of (a) A2Val\_a10obenz, (b) A3Val\_a10obenz, (c) A4Val\_a10obenz, (d) A5Val\_a10obenz, (e) A6Val\_a10obenz, (f) A2Phe\_a10obenz, (g) A3Phe\_a10obenz, (h) A4Phe\_a10obenz, (i) A2Val\_a8, (j) A3Val\_a8, (k) A4Val\_a8, (l) A4Ala\_a10obenz, (m) A4Leu\_a10obenz, (n) A4Val\_a1obenz and (o) A4Val\_a4obenz, grown from MeOH solutions. The corresponding scale bars are shown for every picture.

**SEM micrographs of compounds from 2 : 1 MeOH : H<sub>2</sub>O solutions:**

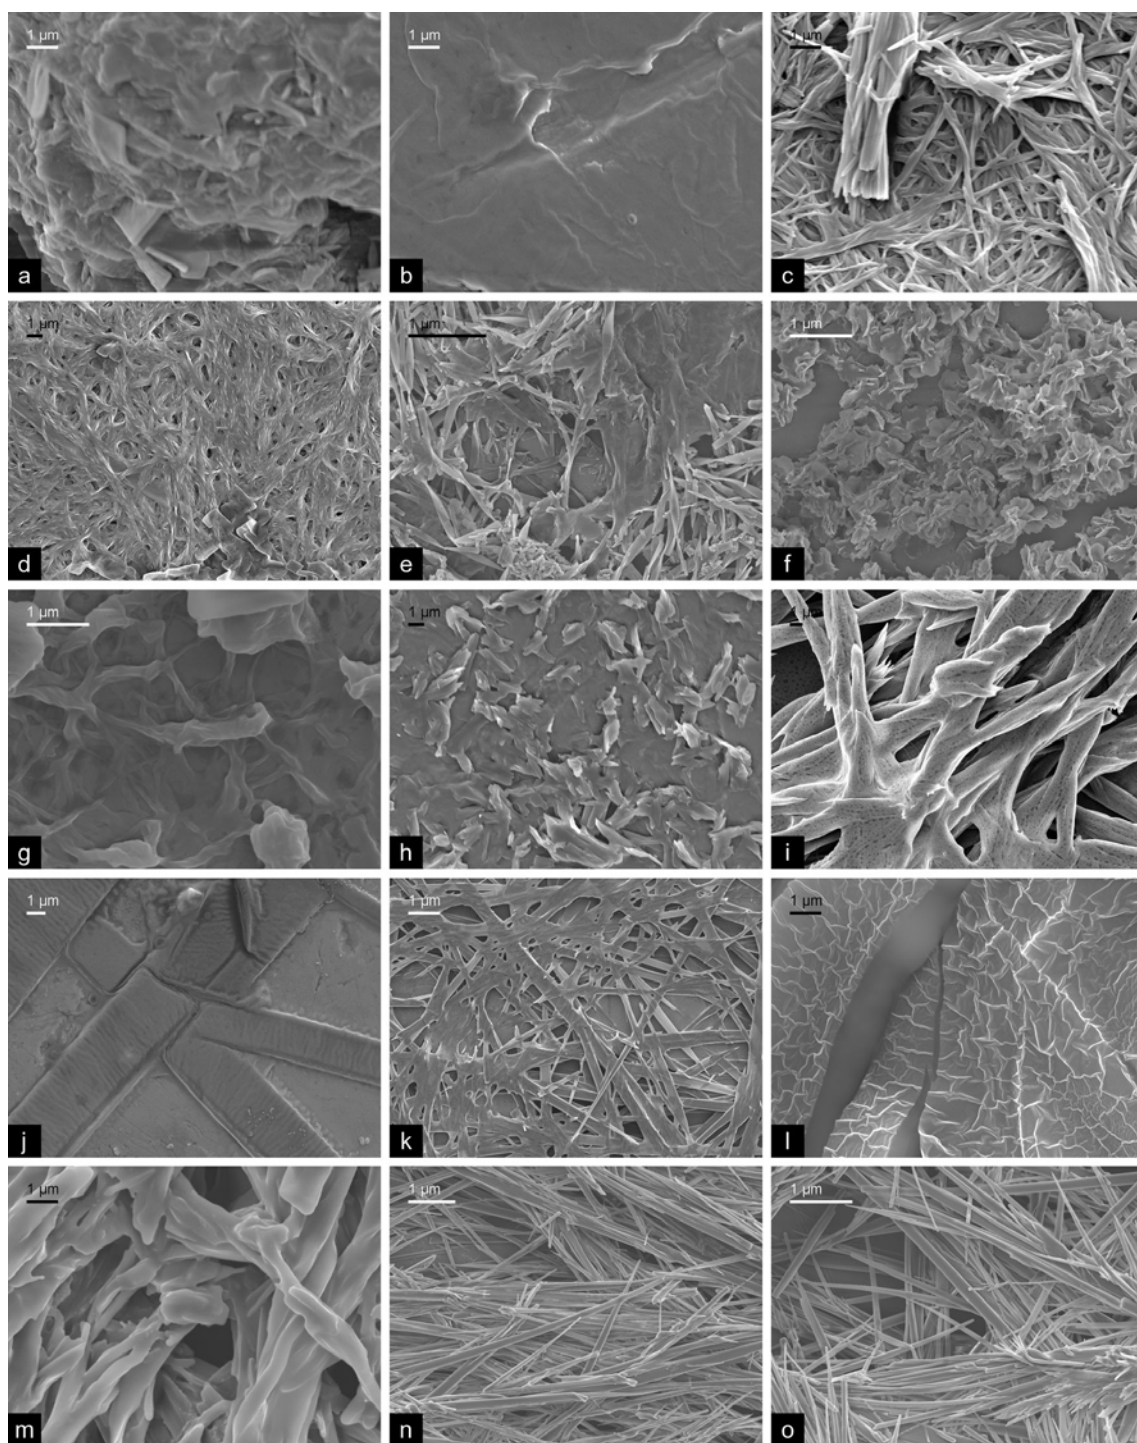

**Figure S3.** SEM micrographs of (a) A2Val\_a10obenz, (b) A3Val\_a10obenz, (c) A4Val\_a10obenz, (d) A5Val\_a10obenz, (e) A6Val\_a10obenz, (f) A2Phe\_a10obenz, (g) A3Phe\_a10obenz, (h) A4Phe\_a10obenz, (i) A2Val\_a8, (j) A3Val\_a8, (k) A4Val\_a8, (l) A4Ala\_a10obenz, (m) A4Leu\_a10obenz, (n) A4Val\_a1obenz and (o) A4Val\_a4obenz, grown from 2 : 1 MeOH : H<sub>2</sub>O solutions. The corresponding scale bars are shown for every picture.

**SEM micrographs of compounds from 2 : 1 MeOH : H<sub>2</sub>O solutions in the presence of acid (HCl):**

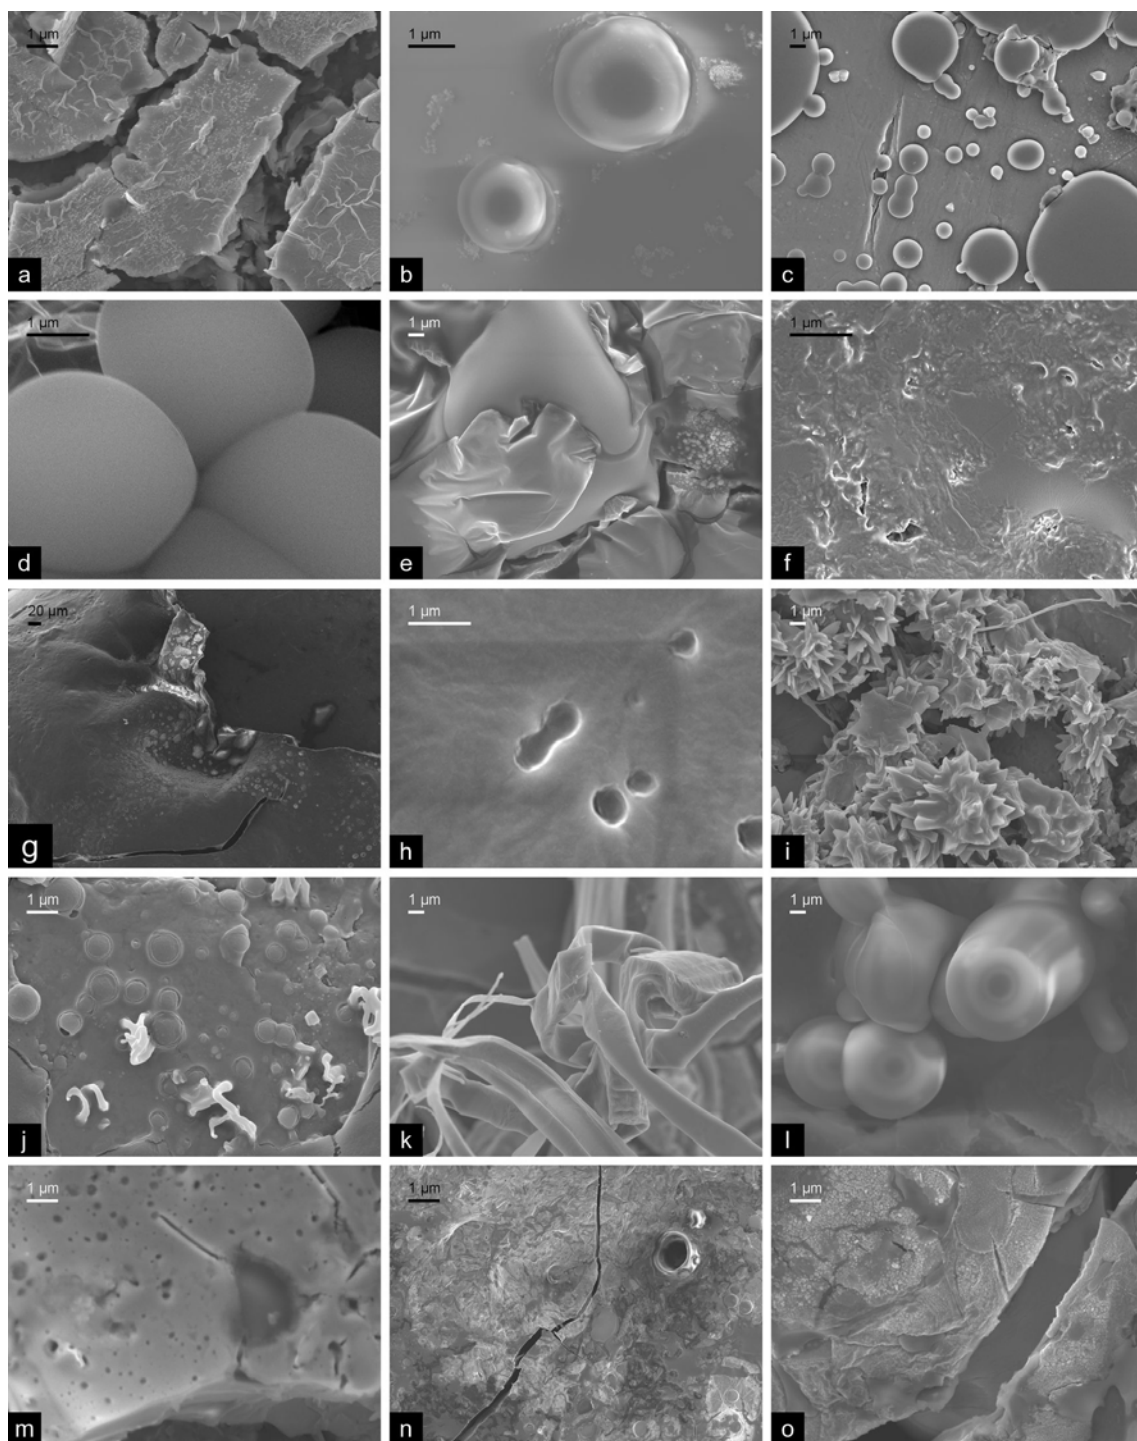

**Figure S4.** SEM micrographs of (a) A2Val\_a10obenz, (b) A3Val\_a10obenz, (c) A4Val\_a10obenz, (d) A5Val\_a10obenz, (e) A6Val\_a10obenz, (f) A2Phe\_a10obenz, (g) A3Phe\_a10obenz, (h) A4Phe\_a10obenz, (i) A2Val\_a8, (j) A3Val\_a8, (k) A4Val\_a8, (l) A4Ala\_a10obenz, (m) A4Leu\_a10obenz, (n) A4Val\_a1obenz and (o) A4Val\_a4obenz, grown from 2 : 1 MeOH : H<sub>2</sub>O solutions in the presence of acid (HCl). The corresponding scale bars are shown for every picture.

**NMR spectra of A4Val\_a10obenz (3) at different conditions:**

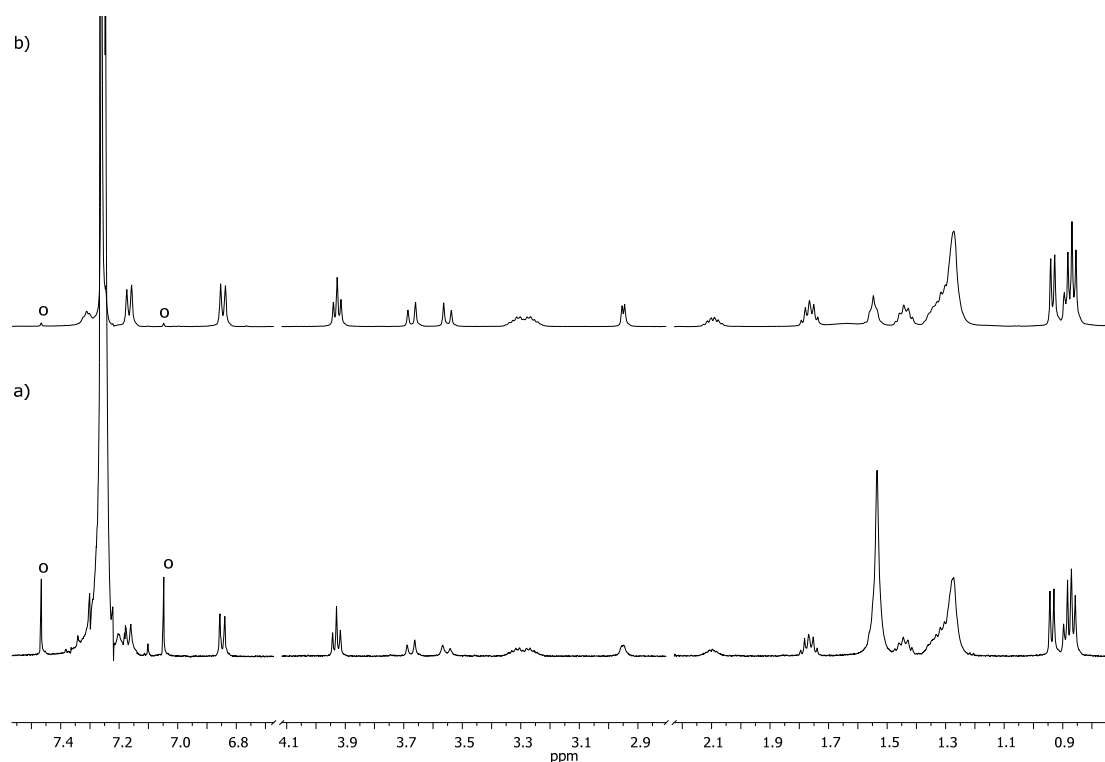

**Figure S5.** <sup>1</sup>H NMR spectra of A4Val\_a10obenz (3) (500 MHz, 303 K, in CD<sub>3</sub>OD) at 1 mM (a), and 20 mM (b).

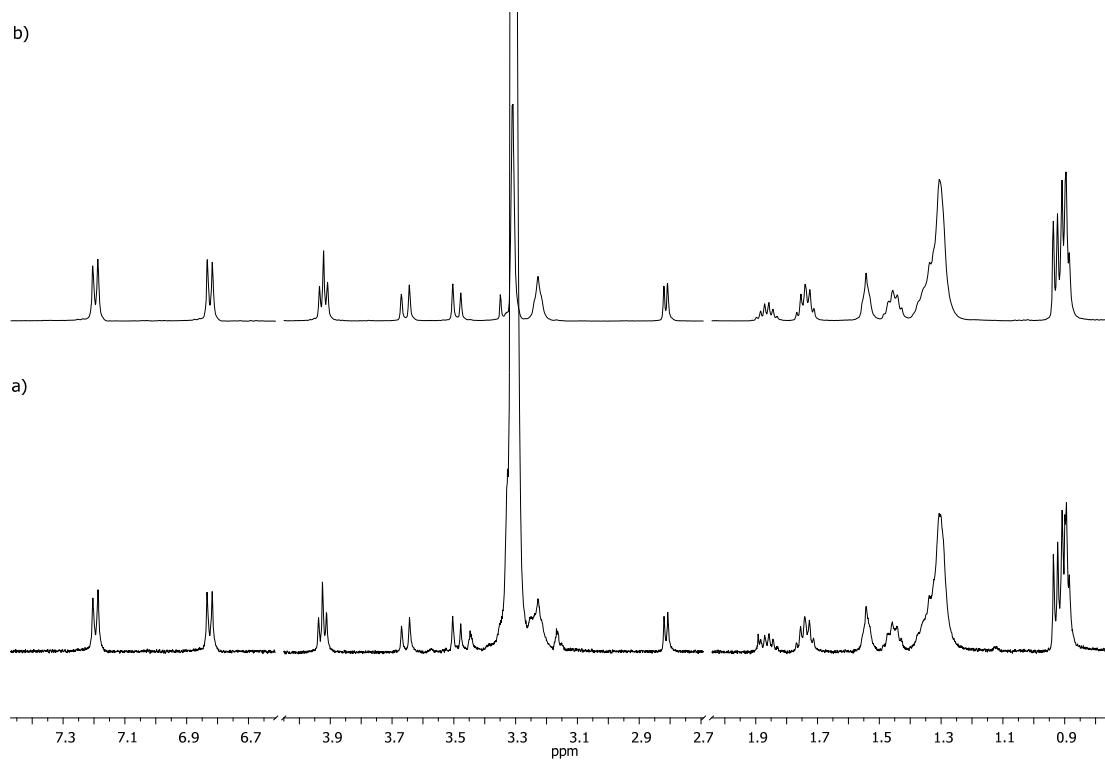

**Figure S6.** <sup>1</sup>H NMR spectra of A4Val\_a10obenz (3) (500 MHz, 303 K, in CD<sub>3</sub>OD) at 1 mM (a), and 20 mM (b).

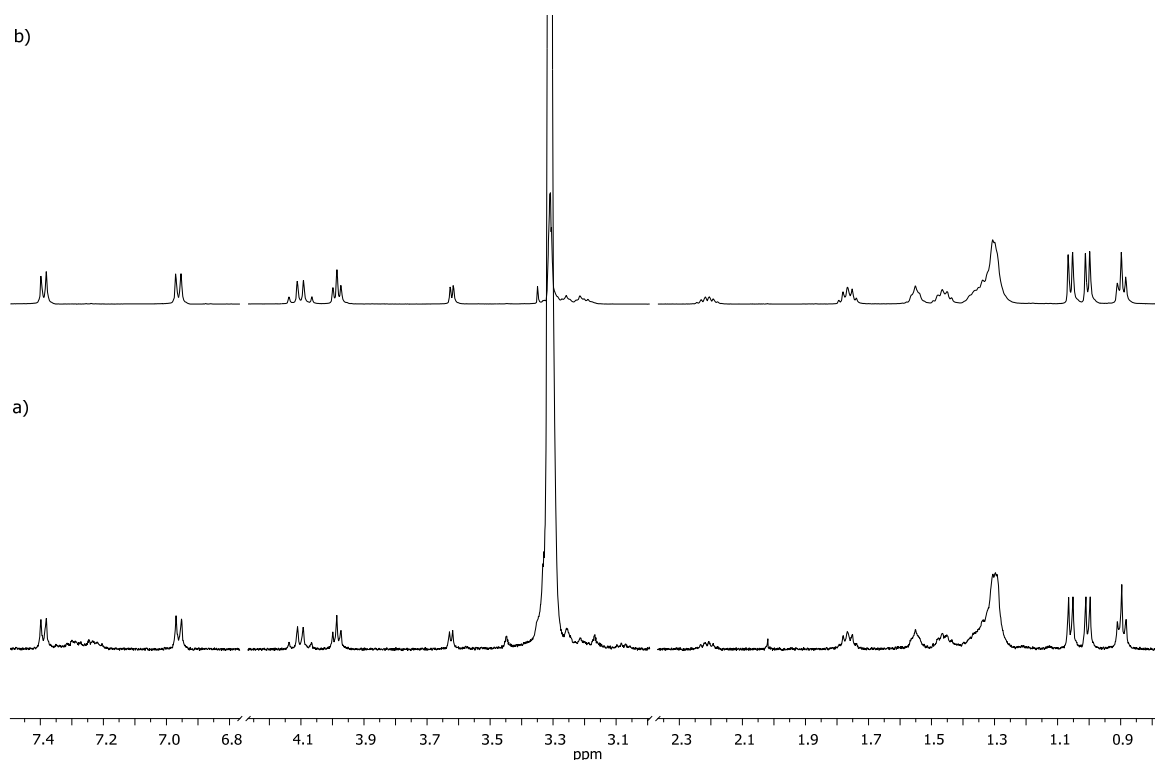

**Figure S7.** <sup>1</sup>H NMR spectra of A4Val\_a10benz (3) (500 MHz, 303 K, in CD<sub>3</sub>OD + DCl) at 1 mM (a), and 20 mM (b).

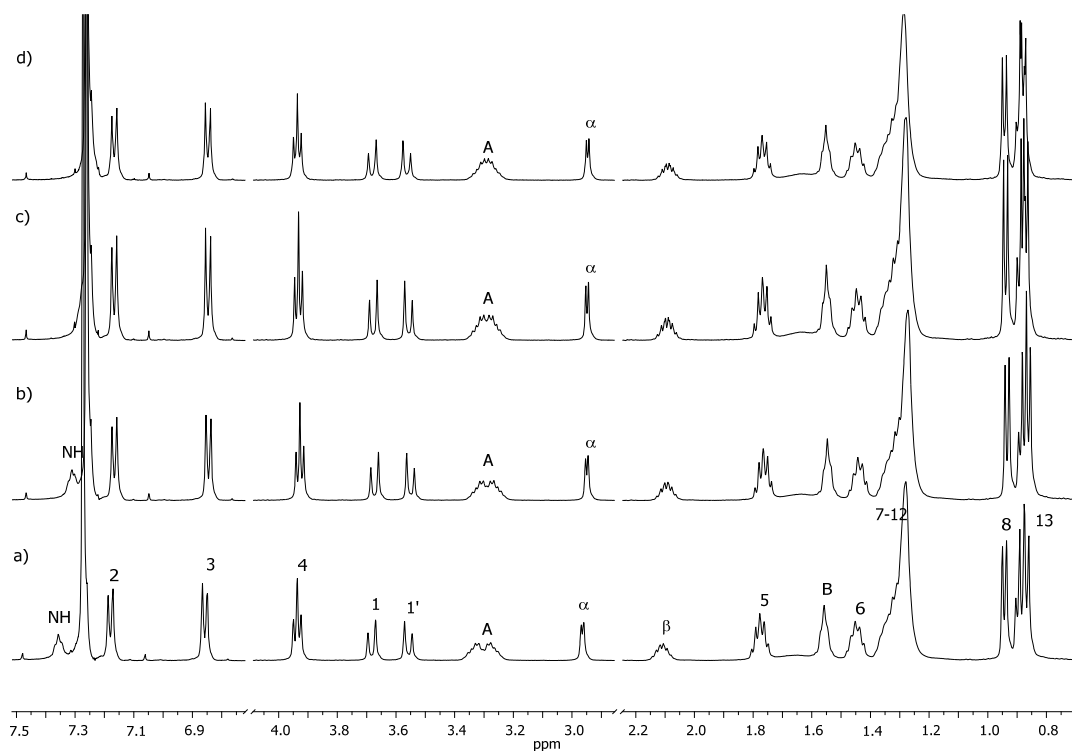

**Figure S8.** <sup>1</sup>H NMR spectra of A4Val\_a10benz (3) (500 MHz, 20 mM, in CDCl<sub>3</sub>) at 294 K (a), 303 K (b), 313 K (c) and 323 K (d). Assignations of the signals experiencing changes are shown following the arbitrary lettering of the chemical substructure.

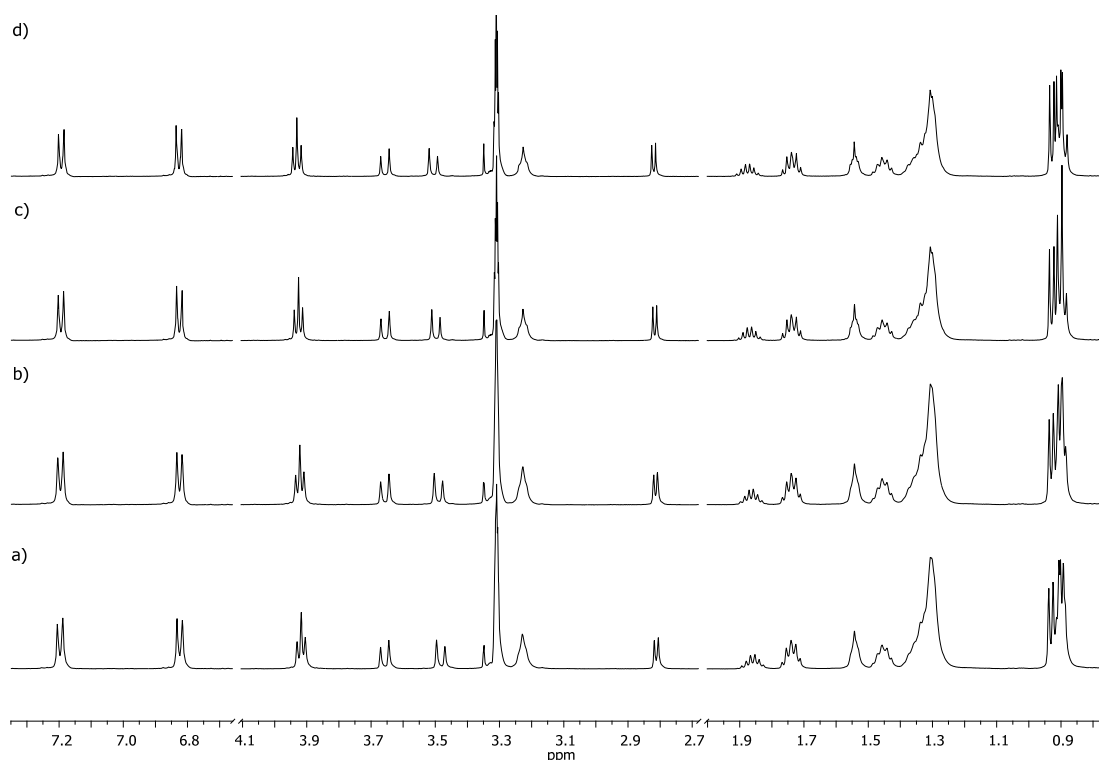

**Figure S9.** <sup>1</sup>H NMR spectra of A4Val\_a10obenz (3) (500 MHz, 20 mM, in CD<sub>3</sub>OD) at 294 K (a), 303 K (b), 313 K (c) and 323 K (d).

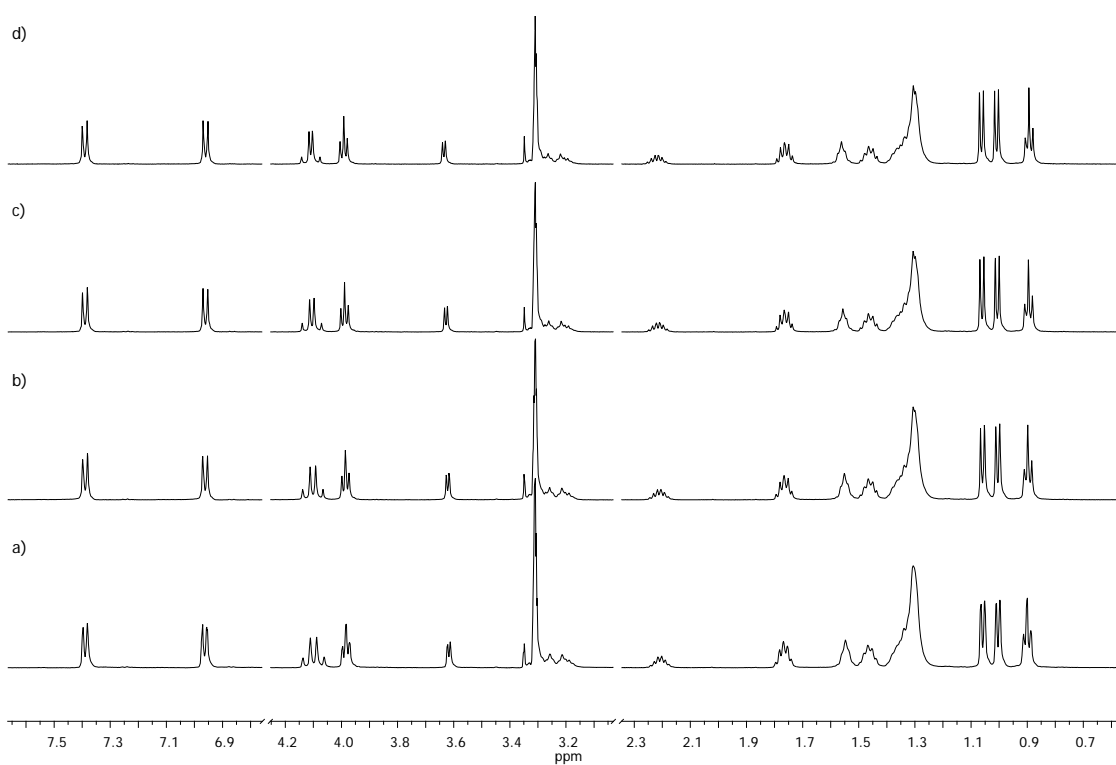

**Figure S10.** <sup>1</sup>H NMR spectra of A4Val\_a10obenz (3) (500 MHz, 20 mM, in CD<sub>3</sub>OD + DCl) at 294 K (a), 303 K (b), 313 K (c) and 323 K (d).



**NMR studies to check similar trends of compounds:**

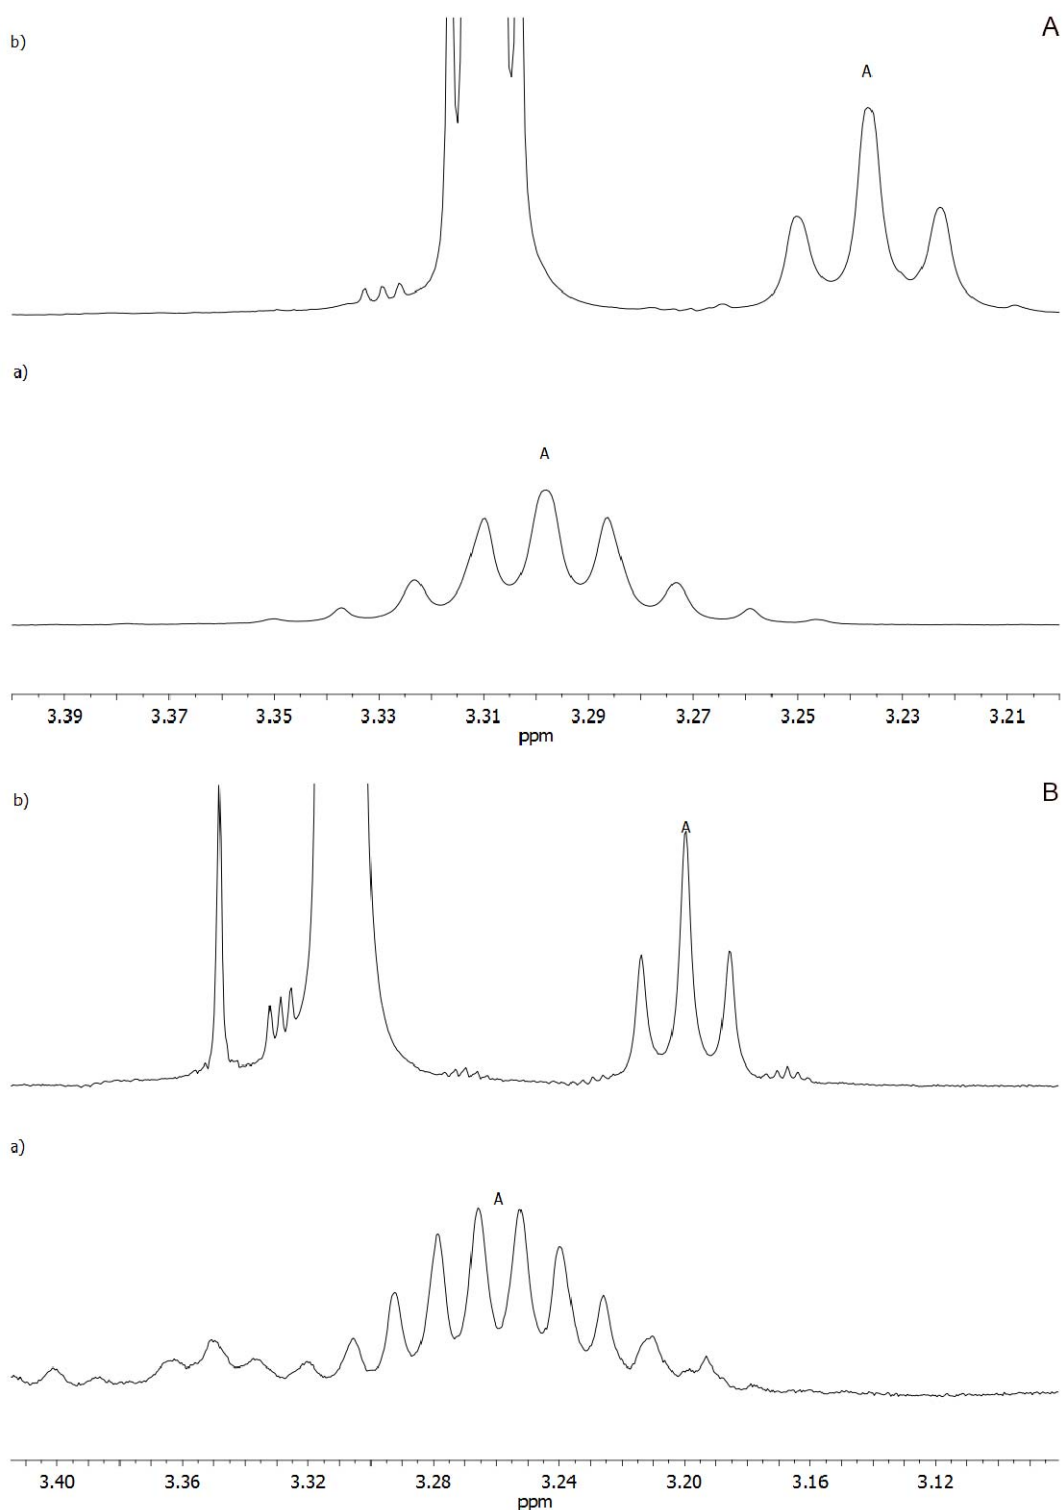

**Figure S11.** Selected partial <sup>1</sup>H NMR spectra (500 MHz, 303 K, 20 mM) of compound A3Val\_a10obenz (2) in CDCl<sub>3</sub> (a) and CD<sub>3</sub>OD (b) (A) and compound A5Val\_a10obenz (4) in CDCl<sub>3</sub> (a) and CD<sub>3</sub>OD (b) (B). Assignations of the signals are shown following the arbitrary lettering of the chemical substructure.

**Table S1.** Deshielding values for different GAPs obtained after protonation of the system. From MeOD to MeOD + DCl.

| Compound         | Deshielding (ppm) |      |      |      |      |            |           |            |
|------------------|-------------------|------|------|------|------|------------|-----------|------------|
|                  | H1                | H1'  | H2   | H3   | H4   | H $\alpha$ | H $\beta$ | H $\gamma$ |
| 1 A2Val_a10obenz | 0.48              | 0.61 | 0.23 | 0.14 | 0.05 | 0.88       | 0.35      | 0.15       |
| 2 A3Val_a10obenz | 0.48              | 0.58 | 0.19 | 0.13 | 0.06 | 0.80       | 0.34      | 0.12       |
| 3 A4Val_a10obenz | 0.47              | 0.59 | 0.20 | 0.14 | 0.07 | 0.81       | 0.33      | 0.13       |
| 4 A5Val_a10obenz | 0.48              | 0.59 | 0.20 | 0.12 | 0.06 | 0.82       | 0.35      | 0.13       |
| 5 A6Val_a10obenz | 0.47              | 0.58 | 0.19 | 0.13 | 0.06 | 0.79       | 0.35      | 0.12       |

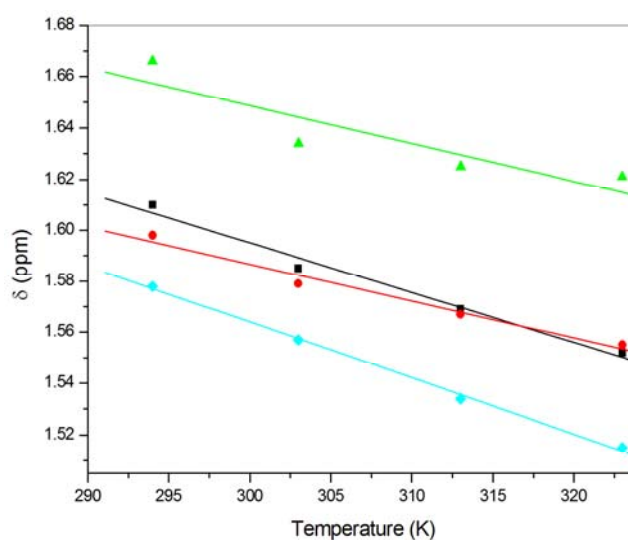

**Figure S12.** Plot of the temperature dependence of  $^1\text{H}$  NMR spectroscopic data of the amine NH protons of A2Val\_a10obenz (1) (black), A3Val\_a10obenz (2) (red), A4Val\_a10obenz (3) (green) and A6Val\_a10obenz (5) (cyan) (all at 500 MHz, 20 mM) in  $\text{CDCl}_3$ .

**Table S2.** Temperature factors for the amine NH protons.

| Compound         | $\Delta\delta_{\text{NHamine}}/\Delta T$ (ppb/K) |
|------------------|--------------------------------------------------|
| 1 A2Val_a10obenz | -3.8                                             |
| 2 A3Val_a10obenz | -4.0                                             |
| 3 A4Val_a10obenz | -2.7                                             |
| 5 A6Val_a10obenz | -3.8                                             |

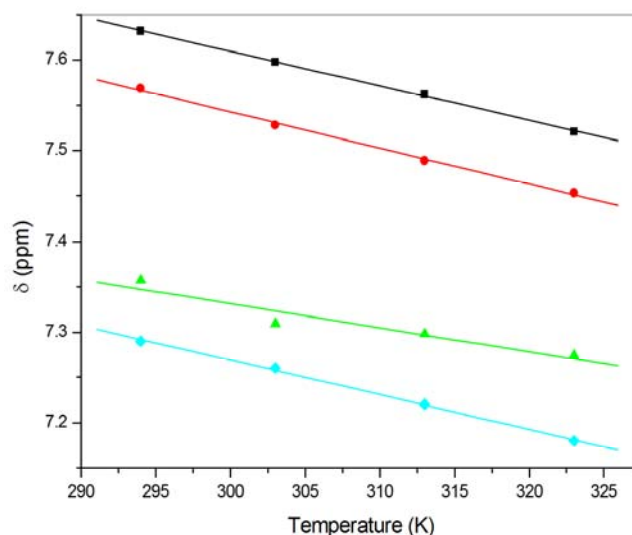

**Figure S13.** Plot of the temperature dependence of  $^1\text{H}$  NMR spectroscopic data of the amide NH protons of A2Val\_a10obenz (1) (black), A3Val\_a10obenz (2) (red), A4Val\_a10obenz (3) (green) and A6Val\_a10obenz (5) (cyan) (all at 500 MHz, 20 mM) in  $\text{CDCl}_3$ .

**Table S3.** Temperature factors for the amide NH protons.

|   | Compound       | $\Delta\delta_{\text{NHamide}}/\Delta T$ (ppb/K) |
|---|----------------|--------------------------------------------------|
| 1 | A2Val_a10obenz | -2.0                                             |
| 2 | A3Val_a10obenz | -1.5                                             |
| 3 | A4Val_a10obenz | -1.6                                             |
| 5 | A6Val_a10obenz | -2.2                                             |

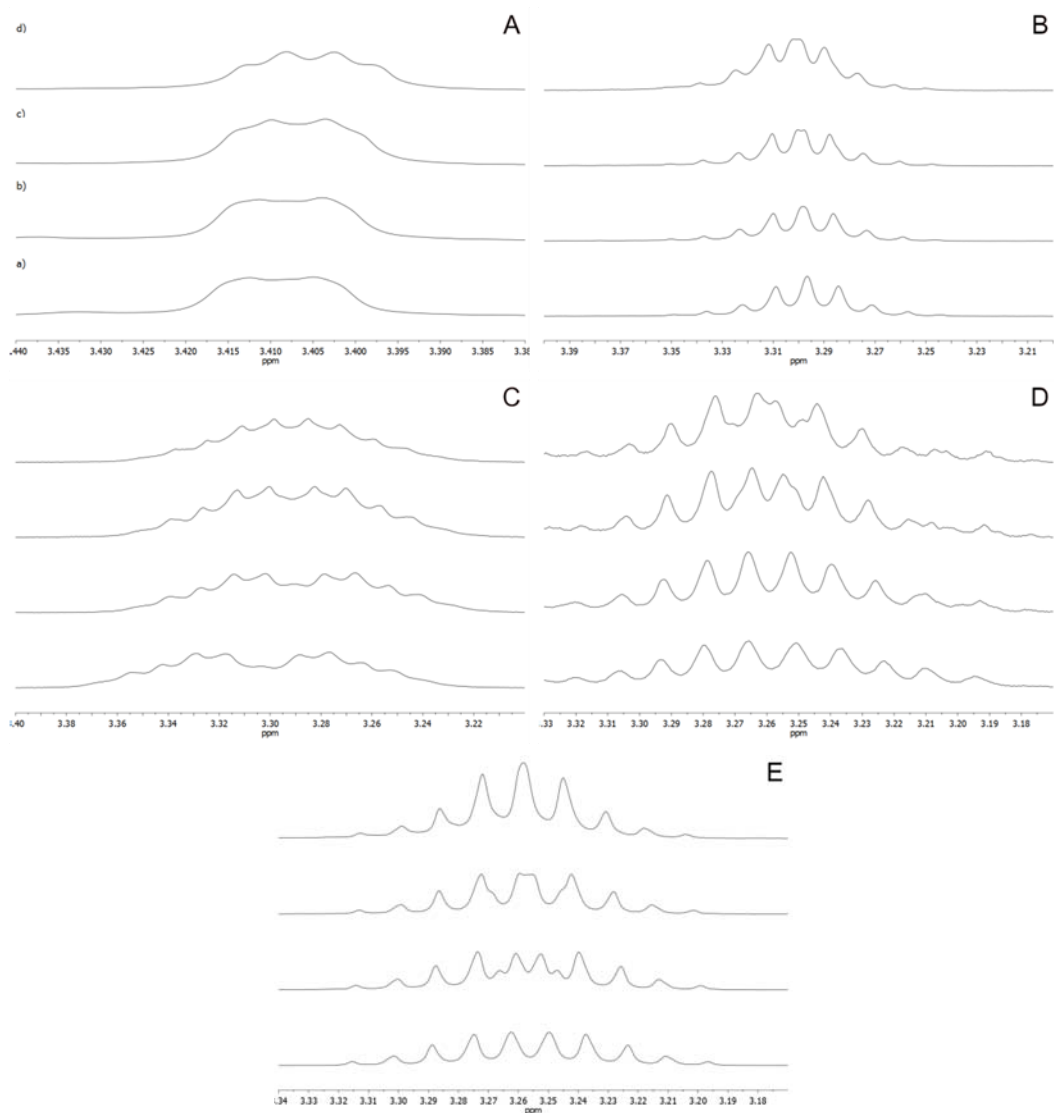

**Figure S14.** Selected partial <sup>1</sup>H NMR spectra (A signal, 500 MHz, 20 mM, CDCl<sub>3</sub>) of compounds A2Val\_a10obenz (A), A3Val\_a10obenz (B), A4Val\_a10obenz (C), A5Val\_a10obenz (D) and A6Val\_a10obenz (E) at 294 K (a), 303 K (b), 313 K (c) and 323 K (d).

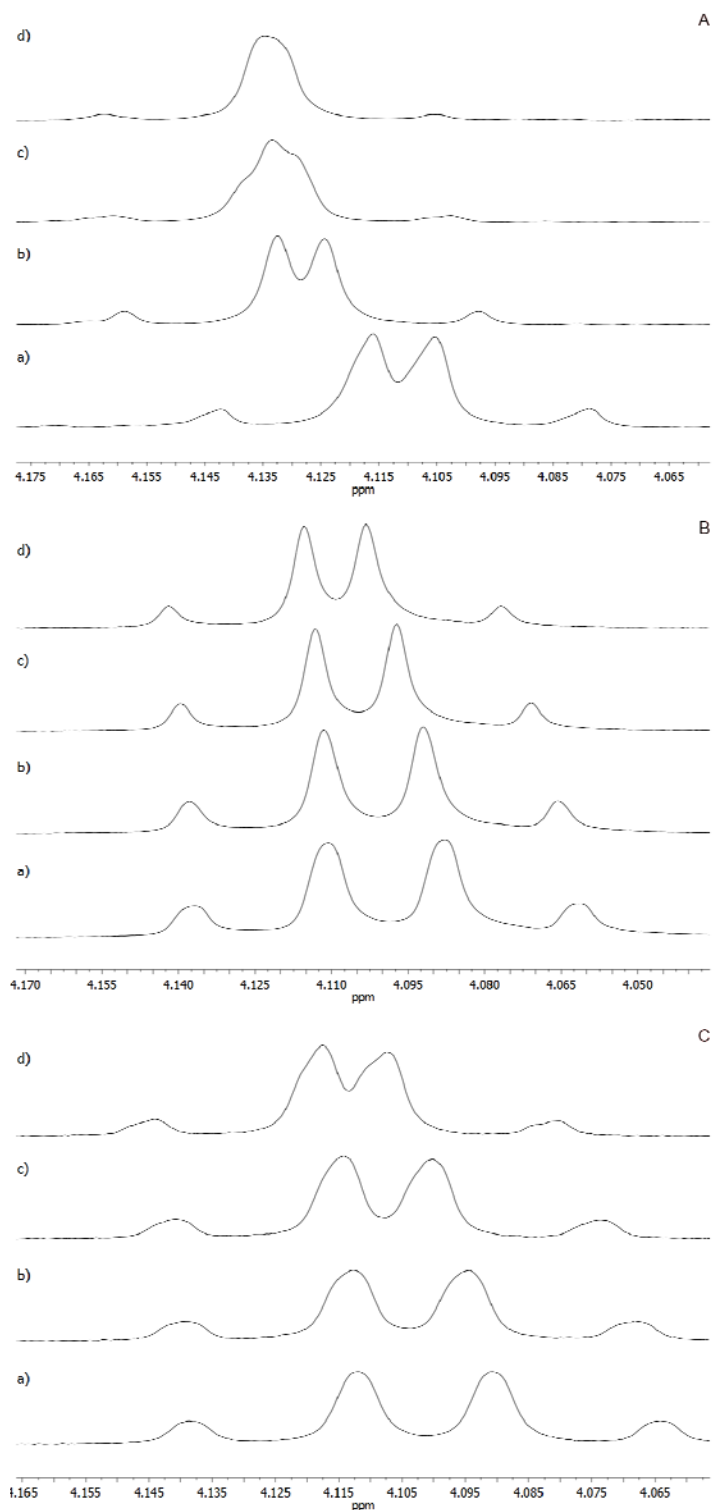

**Figure S15.** Selected partial <sup>1</sup>H NMR spectra (H1 signal, 500 MHz, 20 mM, CD<sub>3</sub>OD + DCl) of compounds A2Val\_a10obenz (A), A4Val\_a10obenz (B) and A6Val\_a10obenz (C) at 294 K (a), 303 K (b), 313 K (c) and 323 K (d).

**UV spectra of A4Val\_a10obenz (3) in MeOH at different concentrations:**

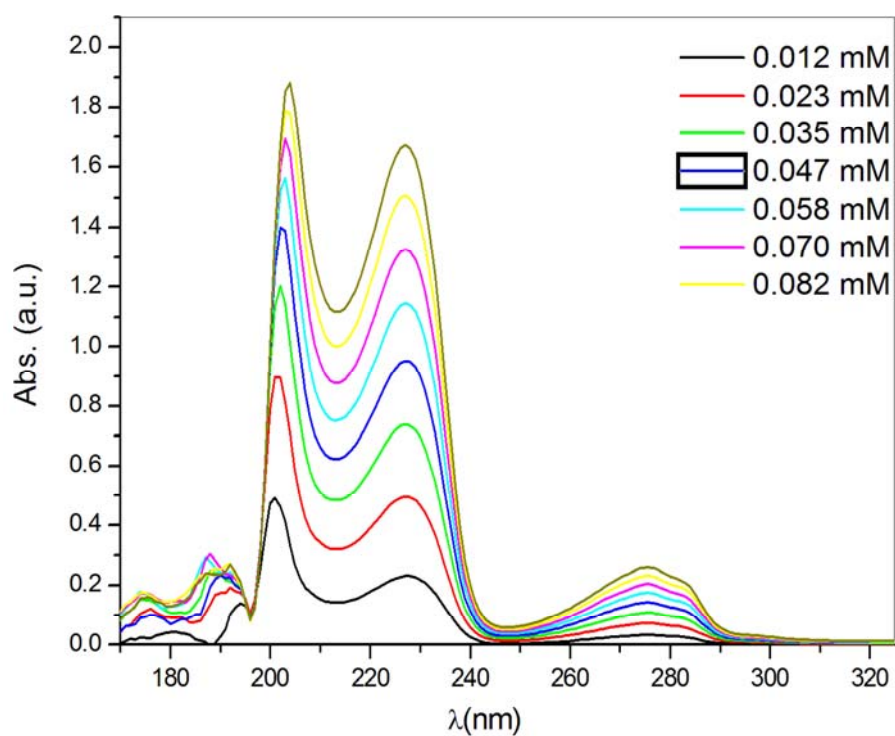

**Figure S16.** UV spectra of the A4Val\_a10obenz (3) in MeOH at different concentrations.

### UV study of compounds at different concentrations in MeOH in the presence of acid:

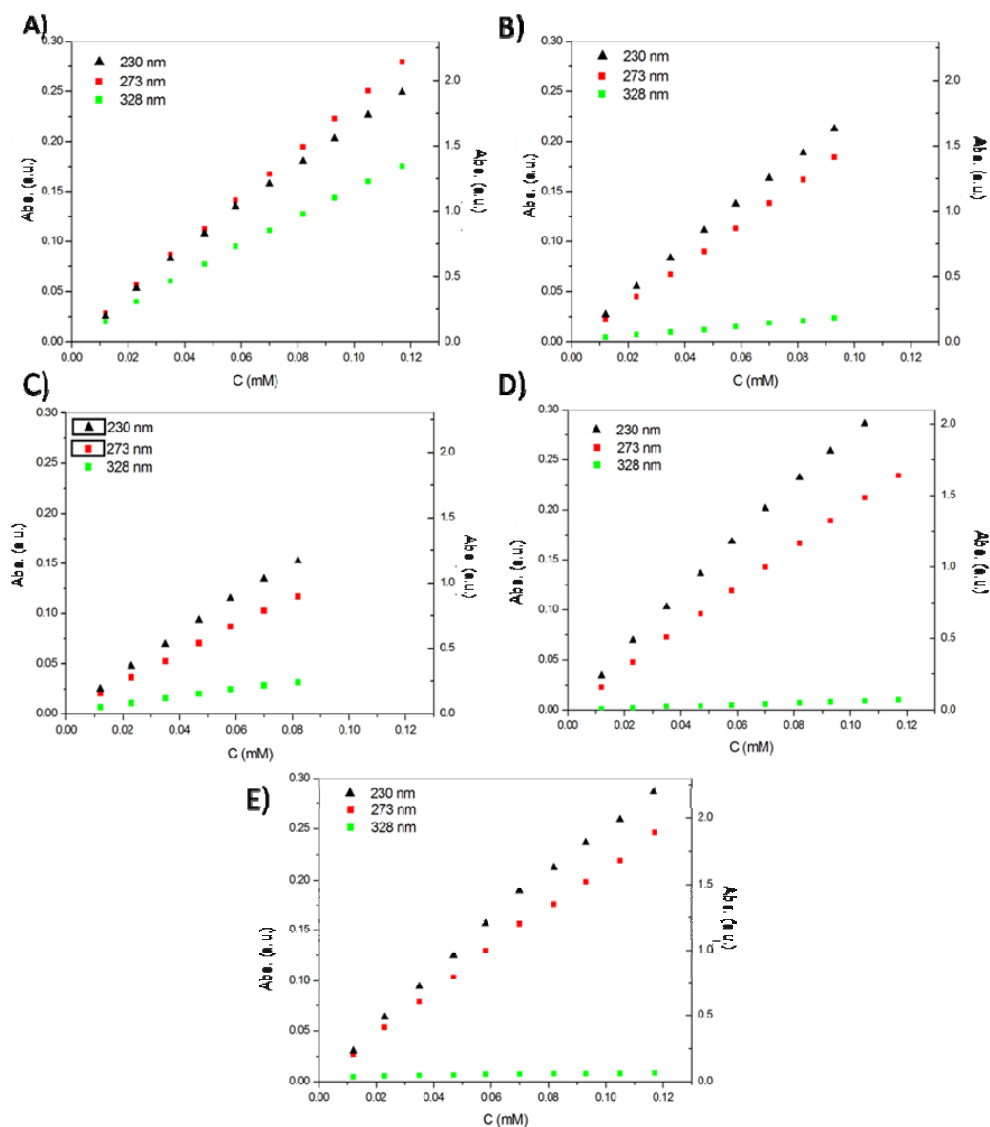

**Figure S17.** Plot of the UV absorbance at the corresponding  $\pi$ - $\pi^*$  transition (black triangle, right axis),  $n$ - $\pi^*$  transition (red square, left axis) and CT band (green square, left axis) in MeOH at acid pH; A2Val\_a10obenz (1) (A), A3Val\_a10obenz (2) (B), A4Val\_a10obenz (3) (C), A5Val\_a10obenz (4) (D) and A6Val\_a10obenz (5) (E).

### UV study of compounds with different long aliphatic tail:

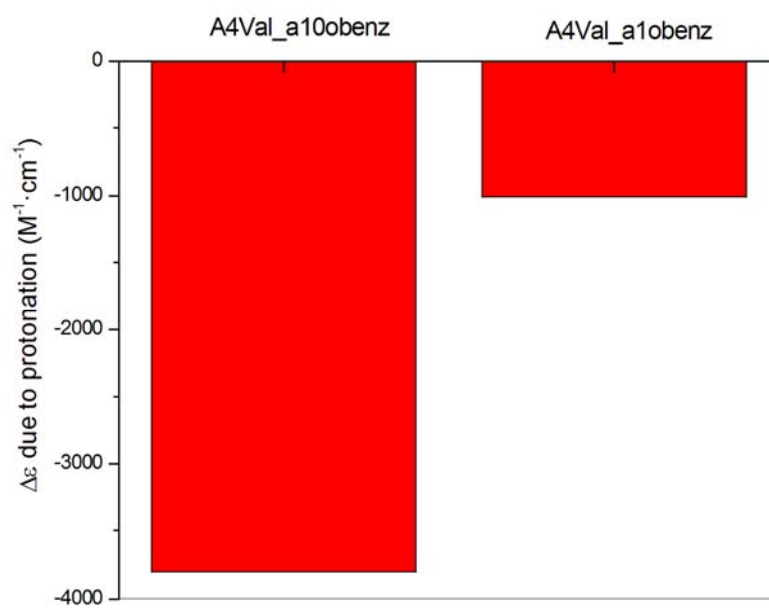

**Figure S18.** Plot of the variation of UV extinction coefficients at the corresponding maxima due to protonation for A4Val\_a10benz and A4Val\_a10benz.



### UV study of compounds with different amino acid side chain:

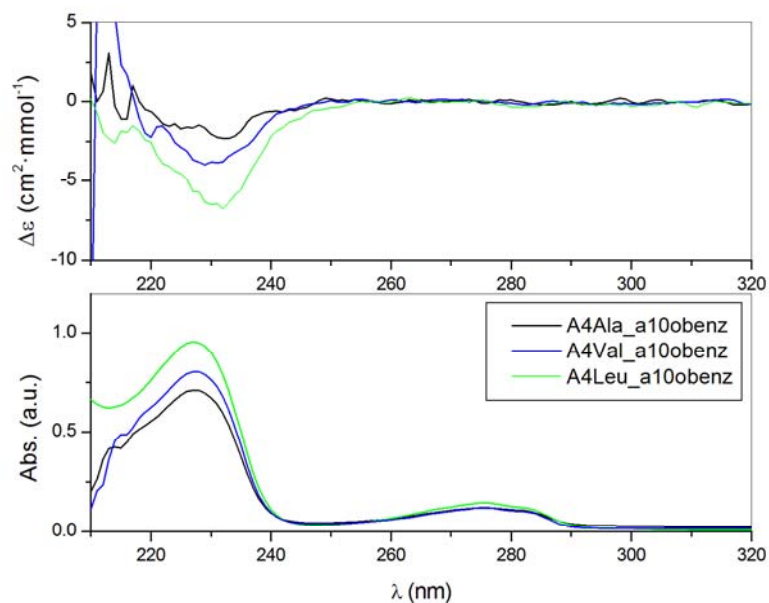

**Figure S19.** UV-CD spectra of A4Xxx\_a10obenz (Xxx = Ala, Val and Leu) in MeOH.

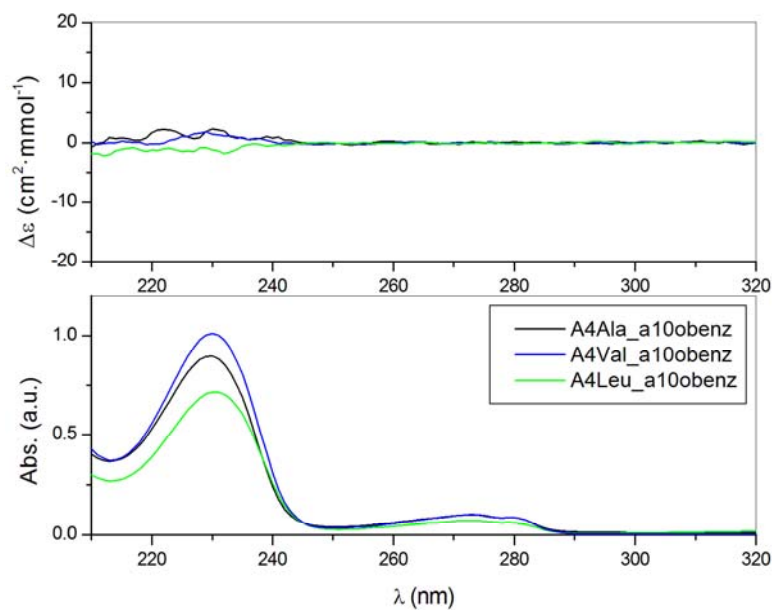

**Figure S20.** UV-CD spectra of A4Xxx\_a10obenz (Xxx = Ala, Val and Leu) in MeOH in the presence of acid.

**UV extinction coefficients at the corresponding maxima for several compounds:**

| <b>Compound</b> | <b>Media</b>                     | <b><math>\lambda_{\max}</math> (nm)</b> | <b><math>\epsilon</math> (<math>M^{-1}\cdot cm^{-1}</math>)</b> | <b>R</b>    |         |
|-----------------|----------------------------------|-----------------------------------------|-----------------------------------------------------------------|-------------|---------|
| A2Val_a10obenz  | MeOH, acid                       | 230                                     | 16200 ± 300                                                     | 0.99876     |         |
|                 |                                  | 273                                     | 2373 ± 13                                                       | 0.99989     |         |
|                 |                                  | 328                                     | 1466 ± 24                                                       | 0.99894     |         |
|                 | MeOH                             | 230                                     | 10414 ± 16                                                      | 0.9979      |         |
|                 |                                  | 273                                     | 3231 ± 7                                                        | 0.9987      |         |
| A3Val_a10obenz  | MeOH, acid                       | 230                                     | 17500 ± 200                                                     | 0.99961     |         |
|                 |                                  | 273                                     | 1993 ± 14                                                       | 0.99985     |         |
|                 |                                  | 328                                     | 240 ± 6                                                         | 0.99822     |         |
|                 | MeOH                             | 230                                     | 15056 ± 12                                                      | 0.9994      |         |
|                 |                                  | 273                                     | 2258.9 ± 0.7                                                    | 0.9996      |         |
| A4Val_a10obenz  | MeOH, acid                       | 230                                     | 14100 ± 300                                                     | 0.99882     |         |
|                 |                                  | 273                                     | 1400 ± 20                                                       | 0.99949     |         |
|                 |                                  | 328                                     | 365 ± 11                                                        | 0.99762     |         |
|                 | MeOH, basic                      | 226                                     | 8050 ± 90                                                       | 0.99969     |         |
|                 |                                  | 276                                     | 1447 ± 18                                                       | 0.99962     |         |
|                 | MeOH                             | 226                                     | 17900 ± 700                                                     | 0.992       |         |
|                 |                                  | 276                                     | 2840 ± 90                                                       | 0.9941      |         |
|                 |                                  | CHCl <sub>3</sub>                       | 238                                                             | 5470 ± 130  | 0.99778 |
|                 |                                  |                                         | 276*                                                            | 3000 ± 300  | 0.93275 |
|                 |                                  | MeOH,<br>acid5%H <sub>2</sub> O         | 230*                                                            | 2820 ± 110  | 0.98592 |
|                 |                                  |                                         | 273                                                             | 399 ± 3     | 0.99953 |
|                 |                                  |                                         | 328                                                             | 273.6 ± 0.5 | 0.99652 |
|                 | MeOH,<br>acid10%H <sub>2</sub> O | 230*                                    | 3200 ± 500                                                      | 0.82072     |         |
| 273             |                                  | 1584 ± 15                               | 0.99917                                                         |             |         |
| A5Val_a10obenz  | MeOH, acid                       | 230                                     | 19000 ± 300                                                     | 0.99907     |         |
|                 |                                  | 273                                     | 2010 ± 13                                                       | 0.99983     |         |
|                 | MeOH                             | 227                                     | 18130 ± 210                                                     | 0.99945     |         |
|                 |                                  | 276                                     | 2752 ± 17                                                       | 0.99984     |         |
| A6Val_a10obenz  | MeOH, acid                       | 230                                     | 18700 ± 400                                                     | 0.99786     |         |
|                 |                                  | 273                                     | 2070 ± 30                                                       | 0.99919     |         |
|                 | MeOH                             | 226                                     | 16220 ± 180                                                     | 0.99951     |         |
|                 |                                  | 275                                     | 2390 ± 30                                                       | 0.99935     |         |
| A4Val_a1obenz   | CHCl <sub>3</sub>                | 238                                     | 4090 ± 80                                                       | 0.998       |         |
|                 |                                  | 276                                     | 2721 ± 13                                                       | 0.9991      |         |
|                 | MeOH, acid                       | 226                                     | 14770 ± 90                                                      | 0.99984     |         |
|                 |                                  | 275                                     | 2242 ± 16                                                       | 0.99979     |         |
|                 |                                  | 276                                     | 2226 ± 16                                                       | 0.99979     |         |
|                 | MeOH, basic                      | 226                                     | 14000 ± 100                                                     | 0.99972     |         |
|                 |                                  | 276                                     | 2082 ± 18                                                       | 0.99969     |         |
|                 | MeOH                             | 226                                     | 15780 ± 80                                                      | 0.99989     |         |
|                 |                                  | 276                                     | 2383 ± 15                                                       | 0.99983     |         |
|                 | A4Ala_a10obenz                   | MeOH, acid                              | 230                                                             | 18190 ± 230 | 0.99935 |
| 273             |                                  |                                         | 2131 ± 19                                                       | 0.99967     |         |
| MeOH            |                                  | 227                                     | 14860 ± 140                                                     | 0.99966     |         |
|                 |                                  | 276                                     | 2349 ± 18                                                       | 0.99977     |         |
| A4Leu_a10obenz  | MeOH, acid                       | 227                                     | 18600 ± 400                                                     | 0.99793     |         |
|                 |                                  | 275                                     | 2640 ± 50                                                       | 0.99871     |         |
|                 | MeOH                             | 230                                     | 20700 ± 400                                                     | 0.99875     |         |
|                 |                                  | 273                                     | 2185 ± 12                                                       | 0.99988     |         |

### Selected bands of the ATR FT-IR spectra of A4Val\_a10obenz at different conditions:

Evolution of the ATR FT-IR spectra of A4Val\_a10obenz: we monitored the IR spectrum from CHCl<sub>3</sub>, MeOH and acidic MeOH solutions until complete evaporation of the solvent to dryness. The spectra were normalized considering the area of the analyzed bands in every region.

#### Amide II (N-H bending) region

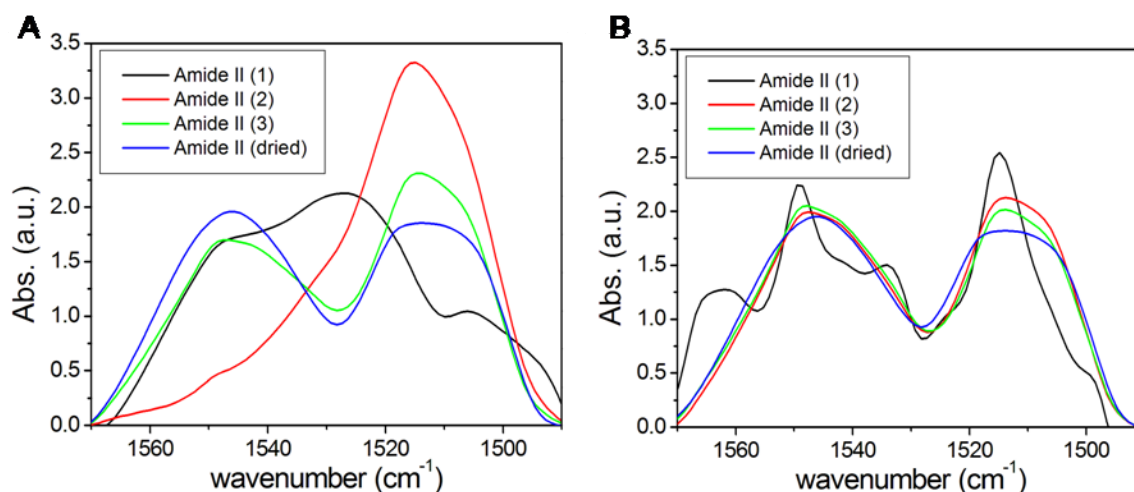

**Figure S21.** Selected regions of several ATR FT-IR spectra of A4Val\_a10obenz: (A) amide II in CHCl<sub>3</sub> and (B) amide II in MeOH.

#### Amide A (N-H stretching) region

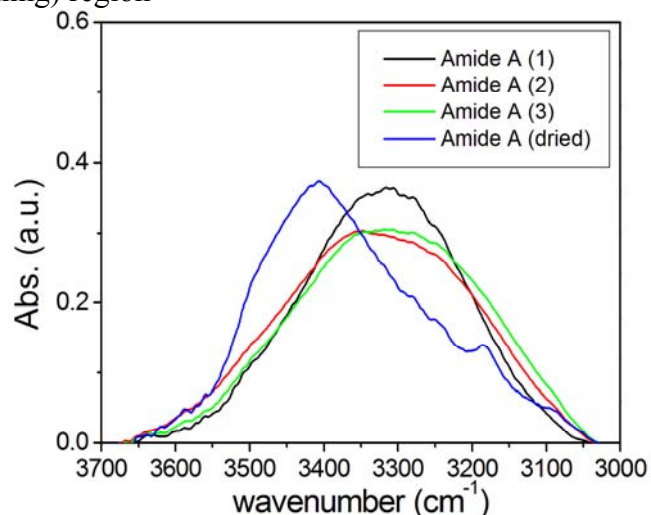

**Figure S22.** ATR FT-IR spectra (amide A region) evolution of 4Val\_a10obenz in acidic MeOH.

Amide I (C=O stretching) and Amide II (N-H bending) regions.

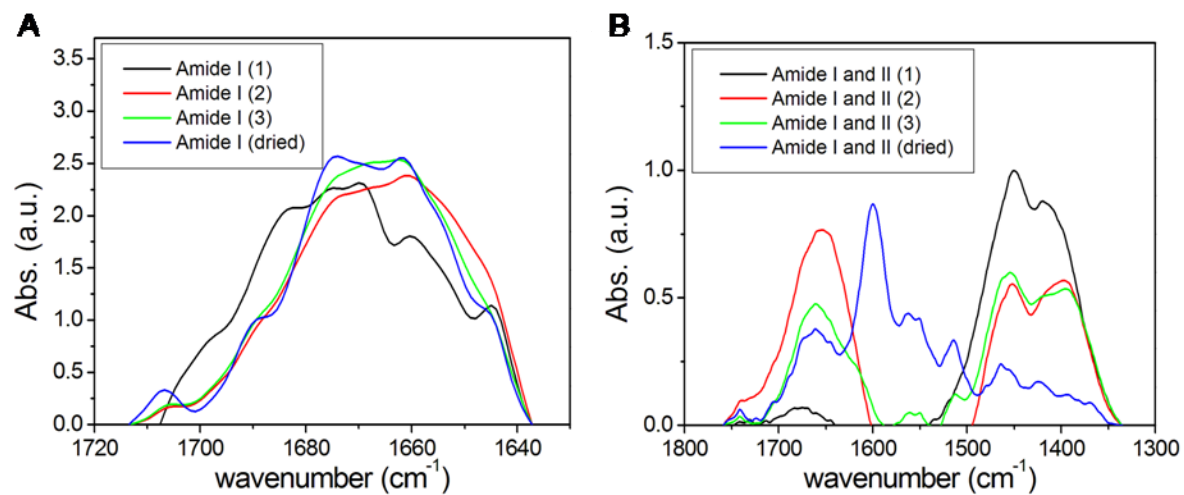

**Figure S23.** Selected regions of several ATR FT-IR spectra of A4Val\_a10obenz: (A) amide I and (B) amide I and II in MeOH with acid.

Evolution of the ATR FT-IR spectra of A4Val\_a10benz upon evaporation of the solvent to dryness.

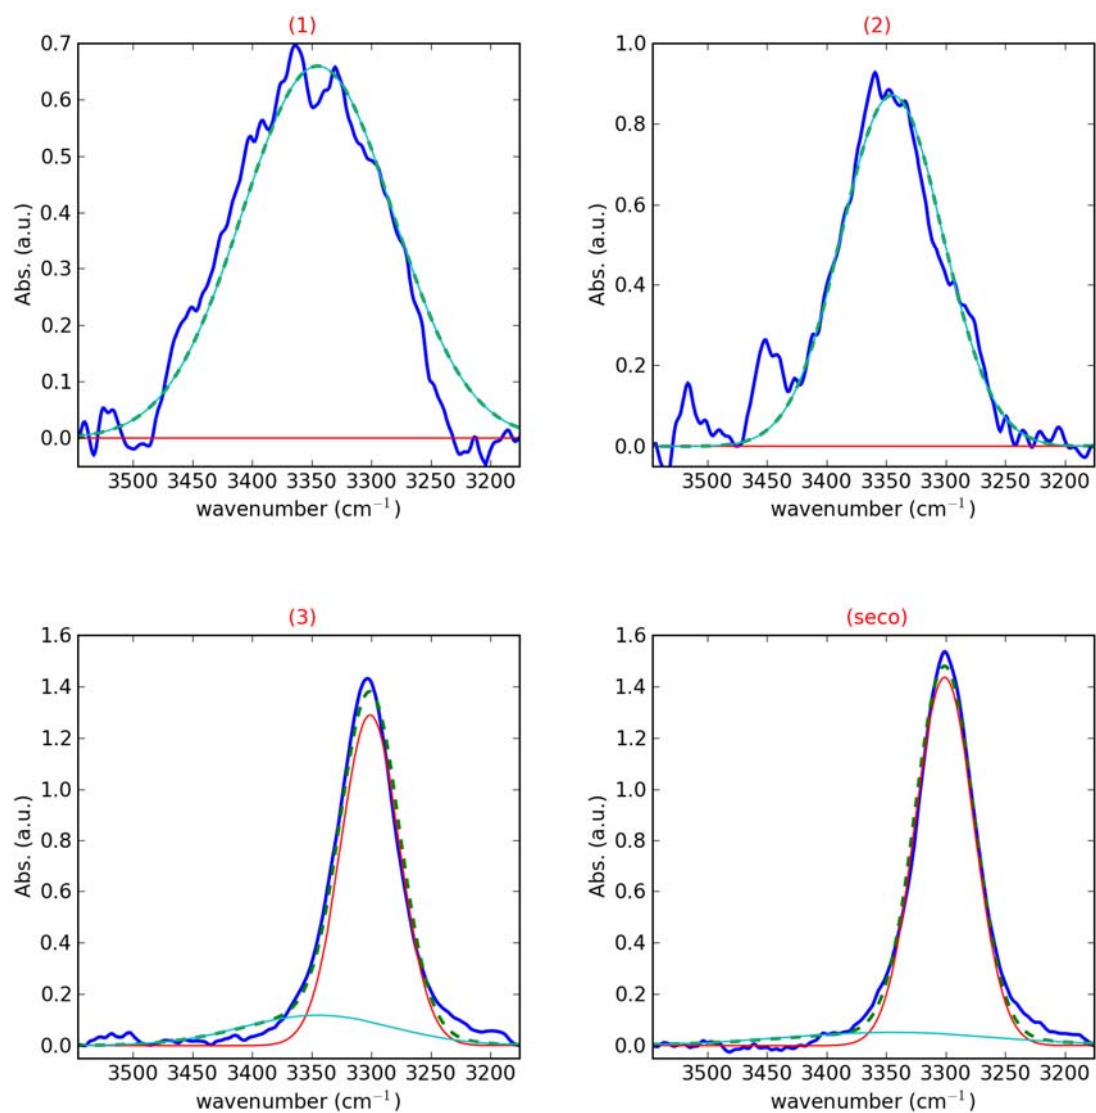

**Figure S24.** Solvent evaporation evolution for amide A for A4Val\_a10benz in CHCl<sub>3</sub>.

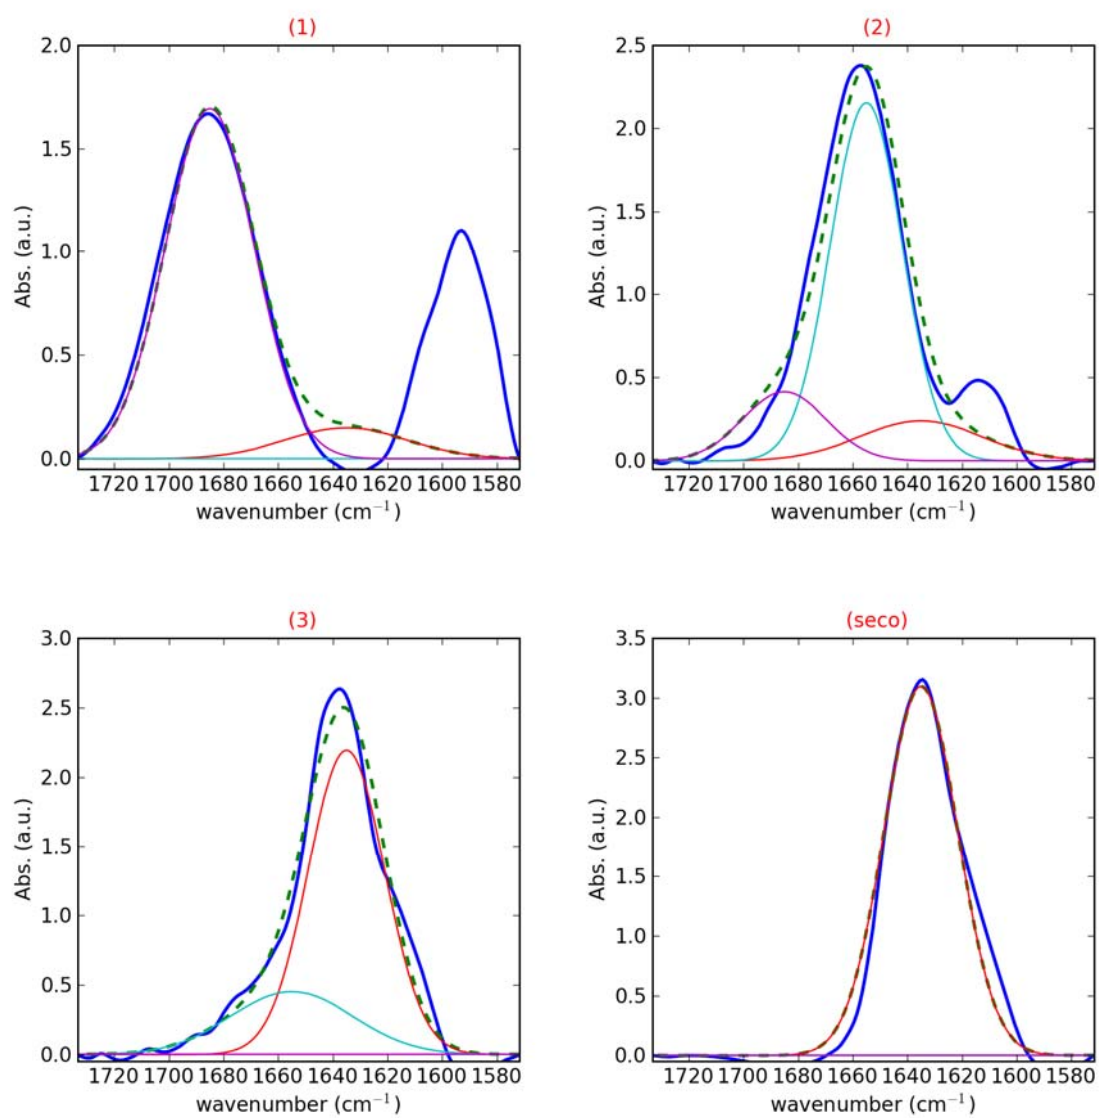

**Figure S25.** Solvent evaporation evolution for amide I for A4Val\_a10obenz in CHCl<sub>3</sub>.

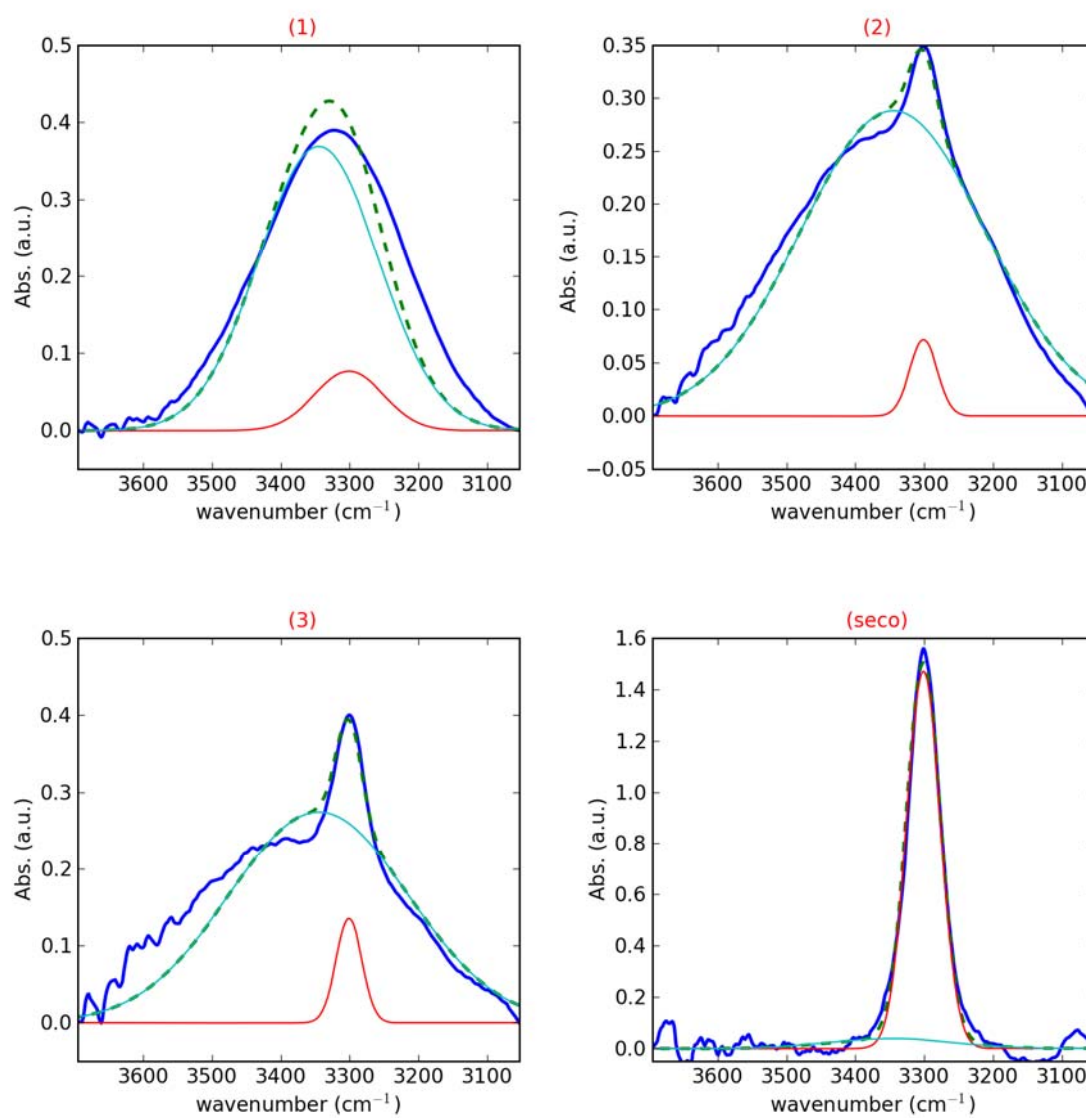

**Figure S26.** Solvent evaporation evolution for amide A for A4Val\_a10benz in MeOH.

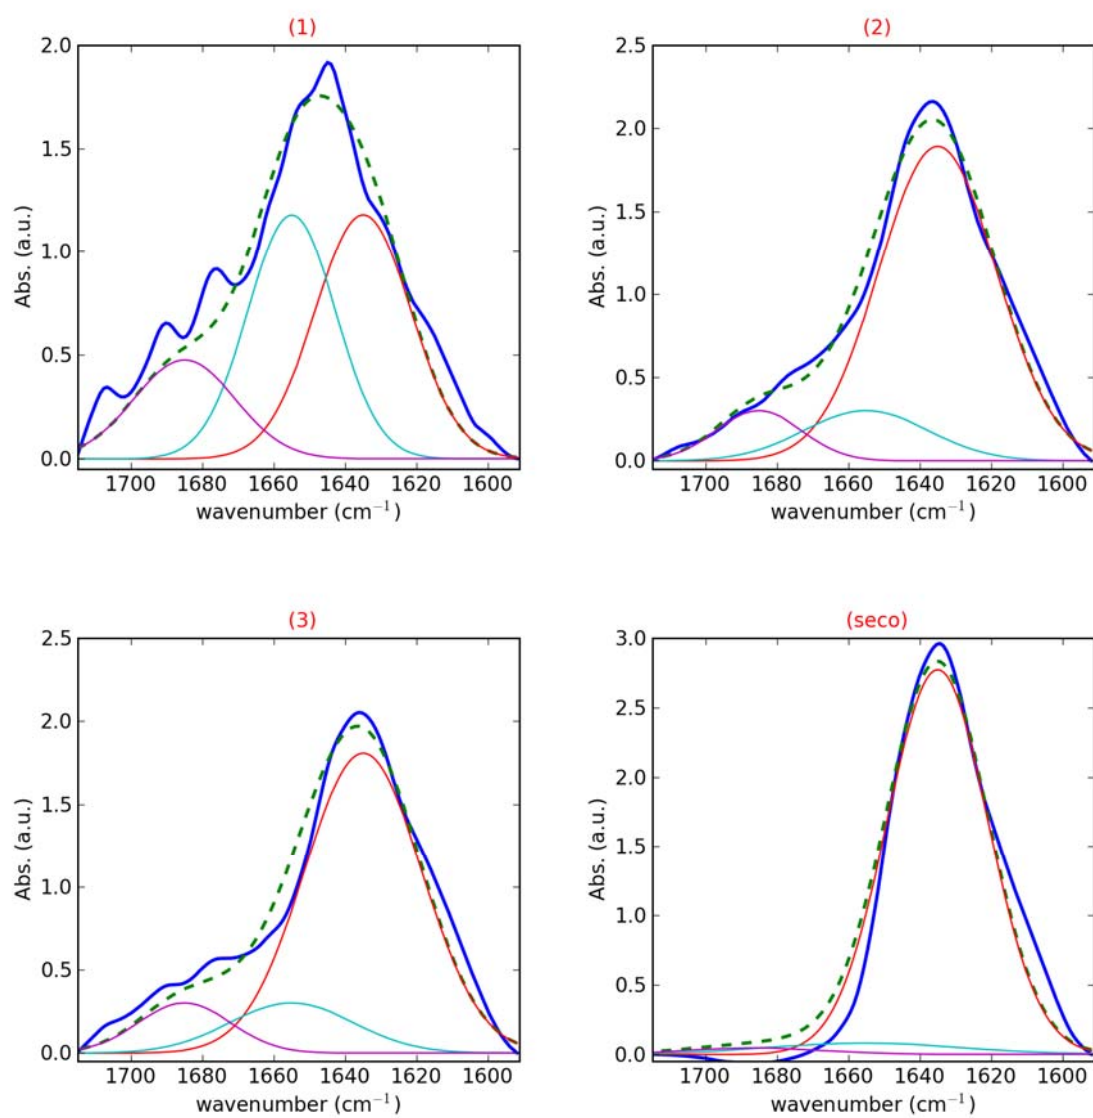

**Figure S27.** Solvent evaporation evolution for amide I for A4Val\_a10obenz in MeOH.



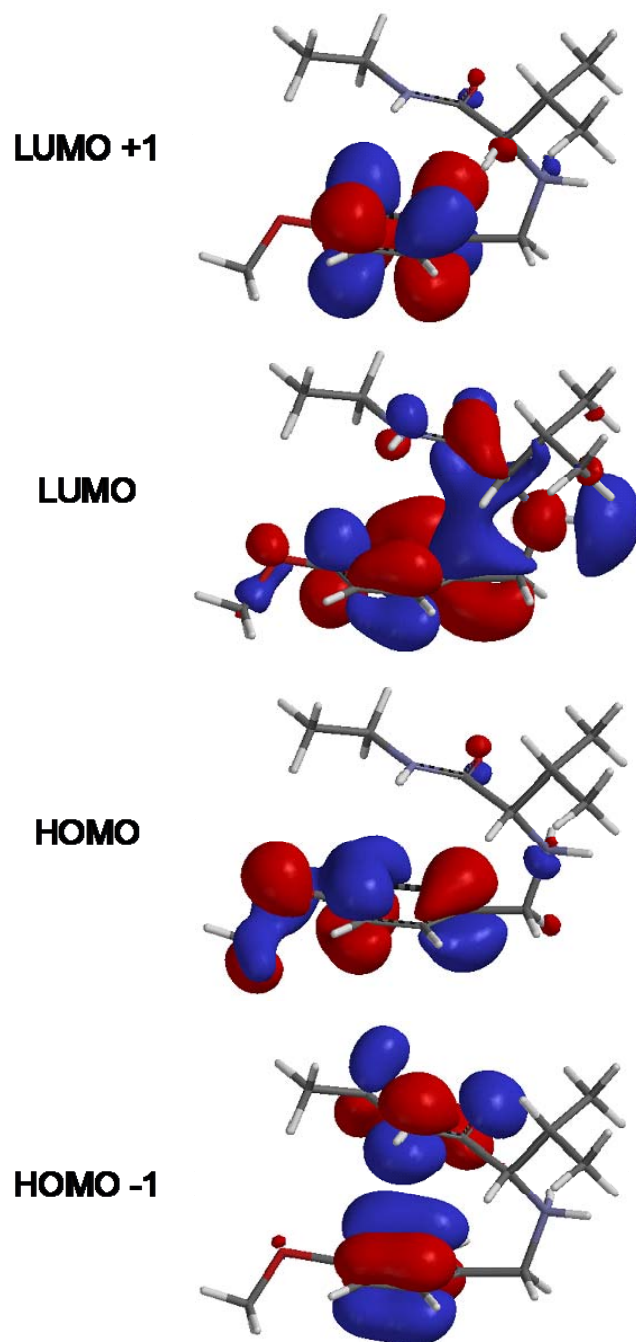

**Figure S28.** Frontier orbitals (B3LYP/6-31G\*) for a simplified fragment of the GAPs.
